# Supplementary material for: A miRNA-regulatory network explains how dysregulated miRNAs perturb oncogenic processes across diverse cancers
Source: HighWire-hosted journal article supplement (doi:10.1101/gr.133991.111), 2012-06-28
Supplement: SuppMethods.docx [file SuppMethods.docx]

**Supplementary Methods: A miRNA-Regulatory Network Explains How Dysregulated miRNAs Perturb Oncogenic Processes Across Diverse Cancers**

Christopher L Plaisier1, Min Pan1, Nitin S. Baliga1

1 Institute for Systems Biology, 401 Terry Avenue North, Seattle, WA 98109-5234

**Address correspondence to:** Nitin S. Baliga, 401 Terry Avenue North, Seattle, WA 98109-5234, Phone: (206) 732-1200, Fax: (206) 732-1299, E-mail: [nbaliga@systemsbiology.org](mailto:nbaliga@systemsbiology.org)

**Running Title:** Cancer-miRNA Regulatory Network

**Keywords:** miRNA, cancer, co-expression, co-regulation, gene expression

**Supplementary Methods**

**De Novo Identification of 3’ UTR Motifs**

Sequences and RefSeq gene definition files were downloaded from the UCSC genome browser FTP site (ftp://hgdownload.cse.ucsc.edu/goldenPath/currentGenomes/Homo_sapiens). To reduce overlap the set of RefSeq genes that mapped to an Entrez gene were collapsed and the regulatory regions were merged to include all potential regulatory sequences. The RefSeq to Entrez gene mapping was downloaded from NCBI Gene FTP site (ftp://ftp.ncbi.nih.gov/gene/DATA/gene2refseq.gz). To provide a 3' untranslated region (UTR) for as many genes as possible we set the minimum 3' UTR length to the median annotated 3' UTR length of 844 bp (Kertesz et al. 2007). The same approach was used for the 5' UTR with a minimum 5' UTR length of 183 bp. The coding sequences were acquired as they were annotated, and were not filtered in anyway.  All annotated introns were removed as they are present only transiently in expressed transcripts. The Weeder *de novo* motif detection algoirthm (Pavesi et al. 2006) was then used to identify over-represented miRNA binding sites in the 3' UTR of putatively miRNA co-regulated genes (Fan et al. 2009; Linhart et al. 2008).

**miRvestigator Hidden Markov Model (HMM) from Position Specific Scoring Matrix**

Two general problems are faced when comparing an miRNA seed which is a string of nucleotides 8 base pairs long (and may be complementary for 6, 7 or 8 base pairs) to a PSSM (a matrix of 4 nucleotide probabilities that must sum to 1 in a column by a variable number of columns). First the miRNA seed sequence must be aligned to the PSSM, and second the certainty of the match between the miRNA seed and the PSSM must be computed. The Viterbi algorithm identifies the optimal path through an HMM for an observed sequence of events, and there can solve both of these problems simultaneously by turning the PSSM into an Hidden Markov Model (HMM) and the miRNA seed nucleotide sequence into the observed sequence of events. The overall structure of the miRvestigator HMM is described in Figure 5. Each column n of the PSSM is converted into a hidden state PSSMn which emits the nucleotides A, G, C and T with the probability of each nucleotide in the PSSM column. There are also two non-matching states NM1 and NM2, which are used to buffer entry and exit respectively to and from the PSSM. The non-matching states emit nucleotides at a random frequency of 0.25 for each nucleotide, thus not favoring any nucleotide over another. This buffering allows for non-matching states at the start and end of the aligned seed to the PSSM, and do not allow for gapping. From the start state the transmission probability is evenly distributed to each PSSMn state and the NM1 state (1/(length of PSSM + 1 )). This allows the alignment to start with equal probability at any point in the miRvestigator HMM. If the alignment starts with NM1 the transition probability back to NM1 is 0.01 and the transition to the next PSSM column state is 0.99. The transition between PSSMn column state and PSSMn+1 column state is 0.99, and 0.01 to the end buffering NM2non-matching state. The last PSSMN state transitions to the end state with a probability of 1. The NM2 non-matching state transitions to itself and the end state with a probability of 1, therefore when an alignment transitions to the NM2 state it stays there till it transitions to the end state. The emitted observations are the miRNA seed sequence being fed into the miRvestigator HMM. The output from the Viterbi algorithm is the optimal state path (a path made up of the PSSMn, NM1, NM2, WOBBLEn states) through the mirvestigator HMM given the miRNA seed nucleotide sequence and a probability for this optimal alignment.

**Significance of the Viterbi Optimal State Path Probability**

The significance of a the Viterbi optimal state path probability for a given miRNA is then calculated by exhaustively computing the complete distribution of Viterbi optimal state path probabilities for all potential miRNA k-mer seed sequences (where k = 6, 7 or 8 base pairs). Only k-mers which are present in the regulatory regions of the transcripts being investigated are included in the exhaustive computation. The complete distribution of Viterbi probabilities is then used to provide a p-value for each miRBase miRNA seed sequence by counting the number of k-mers with a Viterbi optimal state path probability greater than or equal to the miRNA seed of interest divided by the total number of potential k-mers. This provides a p-value for the alignment and match for each miRNA seed sequences to a PSSM identified from cis-regulatory regions. The miRNAs are then ranked based upon the Viterbi optimal state path p-values and the miRNA(s) with the smallest p-values is the most likely to regulate the set of transcripts.

**Modelling Wobble Base-Pairing with miRvestigator HMM**

Wobble base-pairing was included in the miRvestigator HMM for the case where a G=U wobble base-pairing defines the miRNA to protein coding transcript complementarity (Baek et al. 2008; Guo et al. 2010; Hendrickson et al. 2009; Selbach et al. 2008). The individual miRNA to protein coding transcript G=U wobble base-pairing is a problem that will need to be solved at the level of *de novo* motif identification. A wobble base-pairing state is added to the model only if a G and/or U have a nucleotide seed frequency of 25%. For the case where the G seed nucleotide frequency is greater than 25% and the U seed nucleotide frequency is below 25% the wobble state emits the nucleotide A with a probability of 1. For the case where the U seed nucleotide frequency is greater than 25% and the G seed nucleotide frequency is below 25% the wobble state emits the nucleotide C with a probability of 1. For the case where both the G and U seed nucleotide frequencies are greater than 25% the wobble state emits A and C with a probability of 0.5. When a wobble state is added the transition probability from the PSSMn state to the WOBBLEn+1 state is set to 0.19, the transition probability from the PSSMn state to the PSSMn+1 state is set to 0.8, and the transition probability from the PSSMn state to the NM2 state remains at 0.01. The transition probability from the wobble state WOBBLEn to PSSMn+1 is set to 1, which precludes a wobble base-pairing at the terminus of a state path for either transitioning to the NM2 state or to the end state.

**Supplementary References**

Baek D, Villén J, Shin C, Camargo FD, Gygi SP, and Bartel DP. 2008. The impact of microRNAs on protein output. *Nature* **455**: 64–71.

Fan D, Bitterman PB, and Larsson O. 2009. Regulatory element identification in subsets of transcripts: comparison and integration of current computational methods. *RNA* **15**: 1469–1482.

Guo H, Ingolia NT, Weissman JS, and Bartel DP. 2010. Mammalian microRNAs predominantly act to decrease target mRNA levels. *Nature* **466**: 835–840.

Hendrickson DG, Hogan DJ, McCullough HL, Myers JW, Herschlag D, Ferrell JE, and Brown PO. 2009. Concordant regulation of translation and mRNA abundance for hundreds of targets of a human microRNA. *PLoS Biol.* **7**: e1000238.

Kertesz M, Iovino N, Unnerstall U, Gaul U, and Segal E. 2007. The role of site accessibility in microRNA target recognition. *Nat. Genet.* **39**: 1278–1284.

Linhart C, Halperin Y, and Shamir R. 2008. Transcription factor and microRNA motif discovery: the Amadeus platform and a compendium of metazoan target sets. *Genome Res.* **18**: 1180–1189.

Pavesi G, Mereghetti P, Zambelli F, Stefani M, Mauri G, and Pesole G. 2006. MoD Tools: regulatory motif discovery in nucleotide sequences from co-regulated or homologous genes. *Nucleic Acids Res.* **34**: W566–570.

Selbach M, Schwanhäusser B, Thierfelder N, Fang Z, Khanin R, and Rajewsky N. 2008. Widespread changes in protein synthesis induced by microRNAs. *Nature* **455**: 58–63.
