# Supplementary material for: A miRNA-regulatory network explains how dysregulated miRNAs perturb oncogenic processes across diverse cancers
Source: HighWire-hosted journal article supplement (doi:10.1101/gr.133991.111), 2012-06-28
Supplement: SuppTab1.xlsx [file SuppTab1.xlsx]

## Sheet: Sheet1
Supplementary Table 1.
Inference Method	miRNA Seed Complementarity	Cross-Species Conservation	Free Energy of Annealing	Free Energy of Secondary mRNA Structure	Gene Expression miRNA Perturbation Experiments
PITA	X	X	X	X
TargetScan	X	X
miRanda	X	X	X
miRSVR	X	X	X		X
