# Supplementary material for: A miRNA-regulatory network explains how dysregulated miRNAs perturb oncogenic processes across diverse cancers
Source: HighWire-hosted journal article supplement (doi:10.1101/gr.133991.111), 2012-06-28
Supplement: SuppTab2.xlsx [file SuppTab2.xlsx]

## Sheet: Sheet1
Supplementary Table 2.
PMID	miRNA	Perturbation	System	Biological Model	Environment	Assay	Target Genes
15685193	hsa-miR-1	miRNA	HeLa	Ovarian Cancer	in vitro	Transcriptomics	98
15685193	hsa-miR-124	miRNA	HeLa	Ovarian Cancer	in vitro	Transcriptomics	165
15685193	hsa-miR-hes-3 B	miRNA	HeLa	Ovarian Cancer	in vitro	Transcriptomics	61
16549876	hsa-miR-124	miRNA	HepG2	Liver Cancer	in vitro	Transcriptomics	13
16822819	hsa-miR-192	Patient GE & Microcosm	Patients	Follicular Thyroid Cancer	in vivo	Transcriptomics	48
16822819	hsa-miR-197	Patient GE & Microcosm	Patients	Follicular Thyroid Cancer	in vivo	Transcriptomics	57
16822819	hsa-miR-346	Patient GE & Microcosm	Patients	Follicular Thyroid Cancer	in vivo	Transcriptomics	24
17242205	hsa-miR-103	miRNA	HCT116 & DLD-1	Colon Cancer	in vitro	Transcriptomics	110
17242205	hsa-miR-106b	miRNA	HCT116 & DLD-1	Colon Cancer	in vitro	Transcriptomics	22
17242205	hsa-miR-107	miRNA	HCT116 & DLD-1	Colon Cancer	in vitro	Transcriptomics	81
17242205	hsa-miR-141	miRNA	HCT116 & DLD-1	Colon Cancer	in vitro	Transcriptomics	100
17242205	hsa-miR-15a	miRNA	HCT116 & DLD-1	Colon Cancer	in vitro	Transcriptomics	102
17242205	hsa-miR-15b	miRNA	HCT116 & DLD-1	Colon Cancer	in vitro	Transcriptomics	186
17242205	hsa-miR-16	miRNA	HCT116 & DLD-1	Colon Cancer	in vitro	Transcriptomics	64
17242205	hsa-miR-17	miRNA	HCT116 & DLD-1	Colon Cancer	in vitro	Transcriptomics	75
17242205	hsa-miR-192	miRNA	HCT116 & DLD-1	Colon Cancer	in vitro	Transcriptomics	483
17242205	hsa-miR-195	miRNA	HCT116 & DLD-1	Colon Cancer	in vitro	Transcriptomics	185
17242205	hsa-miR-20	miRNA	HCT116 & DLD-1	Colon Cancer	in vitro	Transcriptomics	65
17242205	hsa-miR-200a	miRNA	HCT116 & DLD-1	Colon Cancer	in vitro	Transcriptomics	89
17242205	hsa-miR-200b	miRNA	HCT116 & DLD-1	Colon Cancer	in vitro	Transcriptomics	68
17242205	hsa-miR-215	miRNA	HCT116 & DLD-1	Colon Cancer	in vitro	Transcriptomics	165
17242205	hsa-let-7c	miRNA	HCT116 & DLD-1	Colon Cancer	in vitro	Transcriptomics	52
17308078	hsa-let-7a	miRNA	A549, HeLa & HepG2	Lung, Ovarian & Liver Cancer	in vitro	Transcriptomics	195
17540599	hsa-miR-34a	miRNA	IMR90	Primary Normal Lung	in vitro	Transcriptomics	100
17554337	hsa-miR-34a	miRNA	HCT116	Colon Cancer	in vitro	Transcriptomics	421
17612493	hsa-miR-7	miRNA	HeLa	Ovarian Cancer	in vitro	Transcriptomics	49
17612493	hsa-miR-9	miRNA	HeLa	Ovarian Cancer	in vitro	Transcriptomics	13
17612493	hsa-miR-122a	miRNA	HeLa	Ovarian Cancer	in vitro	Transcriptomics	33
17612493	hsa-miR-128	miRNA	HeLa	Ovarian Cancer	in vitro	Transcriptomics	34
17612493	hsa-miR-132	miRNA	HeLa	Ovarian Cancer	in vitro	Transcriptomics	60
17612493	hsa-miR-133a	miRNA	HeLa	Ovarian Cancer	in vitro	Transcriptomics	197
17612493	hsa-miR-142-3p	miRNA	HeLa	Ovarian Cancer	in vitro	Transcriptomics	81
17612493	hsa-miR-148b	miRNA	HeLa	Ovarian Cancer	in vitro	Transcriptomics	56
17612493	hsa-miR-181a	miRNA	HeLa	Ovarian Cancer	in vitro	Transcriptomics	19
17699775	hsa-let-7b	miRNA	HCT116	Colon Cancer	in vitro	Transcriptomics	197
17891175	hsa-miR-125a	Patient GE	Patients	Prostate Cacner	in vivo	Transcriptomics	25
17991735	hsa-miR-21	Anti-miR	MCF-7	Breast Cancer	in vitro	Transcriptomics	309
18042700	hsa-miR-124	RIP-Chip + miRNA	HEK293S	Human Embryonic Kindey	in vitro	Transcriptomics	287
18390668	hsa-miR-29c	miRNA	HeLa & HepG2	Ovarian Cancer & Human Embryonic Kidney	in vitro	Transcriptomics	12
18461144	hsa-miR-1	RIP-Chip + miRNA	HEK293T	Human Embryonic Kindey	in vitro	Transcriptomics	68
18461144	hsa-miR-124	RIP-Chip + miRNA	HEK293T	Human Embryonic Kindey	in vitro	Transcriptomics	419
19074876	hsa-miR-192	miRNA	HCT116	Colon Cancer	in vitro	Transcriptomics	18
19193853	hsa-miR-155	Anti-miR	Cultured Dendritic Cells	Moncyte Derived Dendritic Cells	in vitro	Transcriptomics	22
19296470	hsa-miR-122	miRNA	Mahlavu, HuH-7 and SK-HEP-1	Hepatocellular Carcinoma	in vitro	Transcriptomics	31
19524507	hsa-miR-31	miRNA	MDA-MB-231	Breast Cancer	in vitro	Luciferase	16
19734348	hsa-miR-17-5p/20a/93/106a/106b E	RIP-Chip + Anti-miR	L428 & L1236	Hodgkin Lymphoma	in vitro	Transcriptomics	84
19775293	hsa-miR-184	miRNA & miRBase	A172 & T98G	Glioma	in vitro	Transcriptomics	17
19826008	hsa-miR-210	Anti-miR	HUVEC	Human Umbilical Vein Embryonic Cells	in vitro	Transcriptomics	32
20042474	hsa-miR-124	RIP-Chip + miRNA	H4 & SH-SY5Y	Neuroblastoma	in vitro	Transcriptomics	10
20042474	hsa-miR-128	RIP-Chip + miRNA	H4 & SH-SY5Y	Neuroblastoma	in vitro	Transcriptomics	11
