# Supplementary material for: A miRNA-regulatory network explains how dysregulated miRNAs perturb oncogenic processes across diverse cancers
Source: HighWire-hosted journal article supplement (doi:10.1101/gr.133991.111), 2012-06-28
Supplement: SuppTab3.xlsx [file SuppTab3.xlsx]

## Sheet: Sheet1
Supplementary Table 3.
	Weeder:miRvestigator	PITA	TargetScan	miRSVR	miRanda
Weeder:miRvestigator		0.49	0.063	1.7e-08	1.8e-09
PITA			0.23	4.6e-07	6.8e-08
TargetScan				0.00014	3.8e-05
miRSVR					0.81
miRanda
