# Supplementary material for: A miRNA-regulatory network explains how dysregulated miRNAs perturb oncogenic processes across diverse cancers
Source: HighWire-hosted journal article supplement (doi:10.1101/gr.133991.111), 2012-06-28
Supplement: SuppTab4.xlsx [file SuppTab4.xlsx]

## Sheet: Sheet1
Supplementary Table 4.
Dataset	Cluster	miRNAname	Complementarity Model	Complementarity	P-value Viterbi
AC_Brain_Sun	4	hsa-miR-937	7mer-a1	CGCGCGGA _||||||| -CGCGCCT	6.10352e-05
AC_Brain_Sun	5	hsa-miR-523	7mer-a1	CGCGCGTT _||||||| -CGCGCAA	6.10352e-05
AC_Brain_Sun	17	hsa-miR-487b	7mer-a1	NGTANGAT _||||||| -CATGCTA	6.10352e-05
AC_Brain_Sun	50	hsa-miR-1234	7mer-m8	TAGGCCNA _||||||| -TCCGGCT	6.10352e-05
AD_Lung_Beer	19	hsa-miR-487b	7mer-a1	GTANNATC |||||||_ CATGCTA-	6.10352e-05
AD_Lung_Beer	31	hsa-miR-29b hsa-miR-29c hsa-miR-29a	8mer	TGGTGCTA |||||||| ACCACGAT	1.5259e-05
AD_Lung_Bhattacharjee	6	hsa-miR-941	8mer	GCCGGGTG |||||||| CGGCCCAC	1.5259e-05
AD_Lung_Bhattacharjee	27	hsa-miR-487b	7mer-a1	CGTACGAT _||||||| -CATGCTA	6.10352e-05
AD_Lung_Bhattacharjee	44	hsa-miR-655	7mer-a1	CTGTATTA _||||||| -ACATAAT	6.10352e-05
AD_Lung_Bhattacharjee	64	hsa-miR-150	7mer-a1	GTTGGGAG _||||||| -AACCCTC	6.10352e-05
AD_Lung_Bhattacharjee	65	hsa-miR-3177	7mer-a1	CGCCSTGC _||||||| -CGGCACG	6.10352e-05
AD_Lung_Stearman	29	hsa-miR-598	7mer-m8	TGANNTAT |||||||_ ACTGCAT-	6.10352e-05
AD_Ovarian_Welsh	6	hsa-let-7e-3p	8mer	CYNTATAG |||||||| GGCATATC	1.5259e-05
AD_Ovarian_Welsh	13	hsa-miR-3178	7mer-a1	TCNCGCCC _||||||| -GCGCGGG	6.10352e-05
AD_Ovarian_Welsh	24	hsa-miR-1469	7mer-a1	GCGCCGAT |||||||_ CGCGGCT-	6.10352e-05
AD_Ovarian_Welsh	29	hsa-miR-3194	7mer-m8	GCTGGCCN |||||||_ CGACCGG-	6.10352e-05
AD_Pancreas_Logsdon	3	hsa-miR-3178	7mer-m8	GCGCCCCG |||||||_ CGCGGGG-	6.10352e-05
AD_Pancreas_Logsdon	10	hsa-miR-1273	7mer-m8	GGTCKCCC _||||||| -CAGCGGG	6.10352e-05
AD_Pancreas_Logsdon	12	hsa-let-7f hsa-miR-98 hsa-let-7b hsa-let-7c hsa-let-7a hsa-let-7g hsa-let-7e hsa-let-7i hsa-let-7d	7mer-a1	CTNCCTCN |||||||_ GATGGAG-	6.10352e-05
AO_Brain_Bredel	10	hsa-miR-4285	7mer-m8	TCNCCNCA |||||||_ AGCGGCG-	6.10352e-05
B-CLL_Leukemia_Haslinger	54	hsa-miR-937	7mer-a1	CGCGCGGA _||||||| -CGCGCCT	6.10352e-05
B-CLL_Leukemia_Haslinger	58	hsa-miR-337	7mer-m8	CNCCNTTC _||||||| -CGGCAAG	6.10352e-05
B-CLL_Leukemia_Haslinger	69	hsa-miR-450a	7mer-a1	ATNNCAAA _||||||| -AGCGTTT	6.10352e-05
BPH_Prostate_Dhanasekaran	13	hsa-miR-423-3p	7mer-a1	GACNGAGC _||||||| -TGGCTCG	6.10352e-05
CA_Bladder_Dyrskjot	13	hsa-miR-548k	7mer-a1	NNTACTTT _||||||| -CATGAAA	6.10352e-05
CA_Bladder_Dyrskjot	17	hsa-miR-885-3p	7mer-a1	CNCTGCCN |||||||_ GCGACGG-	6.10352e-05
CA_Bladder_Dyrskjot	26	hsa-miR-194	7mer-m8	TGTTANAA |||||||_ ACAATGT-	6.10352e-05
CA_Bladder_Dyrskjot	35	hsa-miR-1469	7mer-a1	GCGCCGAT |||||||_ CGCGGCT-	6.10352e-05
CA_Breast_Richardson	15	hsa-let-7d-3p	7mer-a1	TNNTATAC |||||||_ AGCATAT-	6.10352e-05
CA_Breast_Richardson	17	hsa-miR-566	7mer-m8	TGGNNCCC _||||||| -CCGCGGG	6.10352e-05
CA_Breast_Richardson	46	hsa-miR-487b	7mer-m8	TANNATTA |||||||_ ATGCTAA-	6.10352e-05
CA_Breast_Sorlie	24	hsa-miR-1538	8mer	CCGGGCCN |||||||| GGCCCGGC	1.5259e-05
CA_Colon_Graudens	11	hsa-miR-523	8mer	GCGCNTTC |||||||| CGCGCAAG	1.5259e-05
CCC_Ovarian_Hendrix	11	hsa-miR-638	7mer-a1	CCNNTCCC _||||||| -GCTAGGG	6.10352e-05
CCC_Ovarian_Hendrix	23	hsa-miR-523	7mer-a1	GCGCKTTA |||||||_ CGCGCAA-	6.10352e-05
CCC_Ovarian_Hendrix	55	hsa-miR-1471	7mer-a1	TACGCGGG _||||||| -TGCGCCC	6.10352e-05
COID_Lung_Bhattacharjee	10	hsa-miR-138-2-3p	7mer-m8	AAATAGNN |||||||_ TTTATCG-	6.10352e-05
COID_Lung_Bhattacharjee	48	hsa-miR-886	7mer-a1	CCNACCCA |||||||_ GGCTGGG-	6.10352e-05
COID_Lung_Bhattacharjee	84	hsa-miR-615	7mer-m8	CNACCCCC _||||||| -CTGGGGG	6.10352e-05
COID_Lung_Bhattacharjee	87	hsa-miR-1181	7mer-m8	GNGACGGA |||||||_ CGCTGCC-	6.10352e-05
DLBCL_Lymphoma_Alizadeh	5	hsa-miR-132-3p	7mer-m8	ACCACNGT _||||||| -GGTGCCA	6.10352e-05
END_Ovarian_Hendrix	0	hsa-miR-598	8mer	ATGANNTA |||||||| TACTGCAT	1.5259e-05
END_Ovarian_Hendrix	18	hsa-miR-487b	7mer-a1	NGTACGAT _||||||| -CATGCTA	6.10352e-05
END_Ovarian_Hendrix	19	hsa-miR-3195	7mer-a1	ACCGGCGC _||||||| -GGCCGCG	6.10352e-05
END_Ovarian_Hendrix	45	hsa-miR-1471	7mer-a1	TACGCGGG _||||||| -TGCGCCC	6.10352e-05
END_Ovarian_Hendrix	47	hsa-miR-1471	7mer-m8	CGCGGGCG |||||||_ GCGCCCG-	6.10352e-05
END_Ovarian_Hendrix	52	hsa-miR-1538	7mer-a1	CNNGGCCT |||||||_ GGCCCGG-	6.10352e-05
END_Ovarian_Hendrix	58	hsa-miR-621	7mer-m8	GCTAGCNG |||||||_ CGATCGG-	6.10352e-05
END_Ovarian_Hendrix	82	hsa-let-7d-3p	7mer-a1	GTNNTATA _||||||| -AGCATAT	6.10352e-05
FL_Lymphoma_Alizadeh	2	hsa-miR-425-3p	7mer-a1	TTCCNGAC |||||||_ AAGGGCT-	6.10352e-05
FL_Lymphoma_Alizadeh	4	hsa-miR-4261	7mer-a1	TGTTTCCC |||||||_ ACAAAGG-	6.10352e-05
GBM_Brain_Liang	14	hsa-miR-496	7mer-a1	CAATACTC _||||||| -TTATGAG	6.10352e-05
GBM_Brain_Liang	17	hsa-miR-361	7mer-a1	TCTGATAG |||||||_ AGACTAT-	6.10352e-05
GBM_Brain_Liang	18	hsa-miR-369	7mer-a1	GTNGATNG |||||||_ CAGCTAG-	6.10352e-05
GCT_Seminoma_Korkola	3	hsa-miR-324	8mer	GGGATGNG |||||||| CCCTACGC	1.5259e-05
GCT_Seminoma_Korkola	42	hsa-miR-1181	8mer	GGNGASGG |||||||| CCGCTGCC	1.5259e-05
GCT_Seminoma_Korkola	75	hsa-miR-25 hsa-miR-32 hsa-miR-92a hsa-miR-92b hsa-miR-363 hsa-miR-367	7mer-a1	NNTGCAAT _||||||| -CACGTTA	6.10352e-05
GL_Brain_Bredel	15	hsa-miR-126	8mer	CGGTANGA |||||||| GCCATGCT	1.5259e-05
GL_Brain_Bredel	18	hsa-miR-187	8mer	AGACANGA |||||||| TCTGTGCT	1.5259e-05
GL_Brain_Bredel	24	hsa-miR-516b	7mer-a1	ACTCCAGA _||||||| -GAGGTCT	6.10352e-05
GL_Brain_Bredel	48	hsa-miR-2277	7mer-a1	CGCTGTCN |||||||_ GCGACAG-	6.10352e-05
GL_Brain_Bredel	66	hsa-miR-223	7mer-a1	AACTGACT |||||||_ TTGACTG-	6.10352e-05
GL_Brain_Bredel	78	hsa-miR-126	8mer	CGGTAMGA |||||||| GCCATGCT	1.5259e-05
GL_Brain_Rickman	2	hsa-miR-718	7mer-a1	GGNGGAAC |||||||_ CCGCCTT-	6.10352e-05
GL_Brain_Rickman	26	hsa-miR-1469	7mer-a1	GCGCCSAT |||||||_ CGCGGCT-	6.10352e-05
GLB_Brain_Sun	29	hsa-miR-1181	7mer-m8	CGCGACGG _||||||| -CGCTGCC	6.10352e-05
GLB_Brain_Sun	64	hsa-let-7e-3p	7mer-a1	CCNTATAC |||||||_ GGCATAT-	6.10352e-05
HSCC_Head-Neck_Chung	1	hsa-miR-29b hsa-miR-29c hsa-miR-29a	7mer-m8	NNGTGCTA _||||||| -CCACGAT	6.10352e-05
IDC_Breast_Radvanyi	8	hsa-miR-604	7mer-a1	CNCAGCCN |||||||_ GCGTCGG-	6.10352e-05
IDC_Breast_Radvanyi	14	hsa-miR-590-3p	7mer-a1	ATAAAATT _||||||| -ATTTTAA	6.10352e-05
IDC_Breast_Radvanyi	23	hsa-miR-376a-3p	7mer-a1	NNAATCTA _||||||| -CTTAGAT	6.10352e-05
IDC_Breast_Radvanyi	50	hsa-miR-1247	7mer-m8	CGACGGGT _||||||| -CTGCCCA	6.10352e-05
IDC_Breast_Radvanyi	59	hsa-miR-1469	7mer-a1	GCGCCGAC |||||||_ CGCGGCT-	6.10352e-05
ILC_Breast_Radvanyi	6	hsa-let-7d-3p	7mer-a1	TNNTATAC |||||||_ AGCATAT-	6.10352e-05
ILC_Breast_Radvanyi	11	hsa-miR-483	7mer-a1	TCCCNTCT _||||||| -GGGCAGA	6.10352e-05
ME_Melanoma_Hoek	3	hsa-miR-4285	8mer	CTCGCCGC |||||||| GAGCGGCG	1.5259e-05
ML_Melanoma_Talantov	13	hsa-miR-337	7mer-m8	GCCNTTCG |||||||_ CGGCAAG-	6.10352e-05
ML_Melanoma_Talantov	19	hsa-miR-302c-3p	7mer-m8	TKTTAAAT |||||||_ ACAATTT-	6.10352e-05
ML_Melanoma_Talantov	28	hsa-miR-3175	7mer-m8	NCTCCCCN _||||||| -GAGGGGC	6.10352e-05
ML_Melanoma_Talantov	34	hsa-miR-548c-3p	7mer-a1	ANATTTTT _||||||| -CTAAAAA	6.10352e-05
MPC_Prostate_Dhanasekaran	0	hsa-miR-3074	7mer-a1	GCTGATAT _||||||| -GACTATA	6.10352e-05
MPC_Prostate_Dhanasekaran	42	hsa-miR-582-3p	7mer-a1	TACCAGTT _||||||| -TGGTCAA	6.10352e-05
MPM_Mesothelioma_Gordon	9	hsa-miR-219	7mer-a1	NNACAATC _||||||| -CTGTTAG	6.10352e-05
MPM_Mesothelioma_Gordon	13	hsa-miR-1250	7mer-m8	CNCACCGT _||||||| -CGTGGCA	6.10352e-05
MPM_Mesothelioma_Gordon	19	hsa-miR-615	7mer-m8	CSACCCCC _||||||| -CTGGGGG	6.10352e-05
MPM_Mesothelioma_Gordon	22	hsa-miR-1284	7mer-m8	NGTATAGA _||||||| -CATATCT	6.10352e-05
MPM_Mesothelioma_Gordon	40	hsa-miR-3178	7mer-a1	TCNCNCCC _||||||| -GCGCGGG	6.10352e-05
MUC_Ovarian_Hendrix	42	hsa-miR-1181	7mer-m8	GNGACGGT |||||||_ CGCTGCC-	6.10352e-05
MUC_Ovarian_Hendrix	56	hsa-miR-508-3p	7mer-a1	TACAATNN |||||||_ ATGTTAG-	6.10352e-05
OD_Brain_Bredel	5	hsa-miR-423-3p	7mer-a1	TACCNAGC _||||||| -TGGCTCG	6.10352e-05
OD_Brain_Bredel	16	hsa-miR-1181	8mer	GGNGANGG |||||||| CCGCTGCC	1.5259e-05
OD_Brain_Bredel	19	hsa-miR-551a hsa-miR-551b	7mer-m8	CGGGTCGC _||||||| -CCCAGCG	6.10352e-05
OD_Brain_Bredel	37	hsa-miR-29a-3p	7mer-m8	AATCAGTA |||||||_ TTAGTCA-	6.10352e-05
ODGL_Brain_Sun	37	hsa-miR-126	8mer	CGGTACGA |||||||| GCCATGCT	1.5259e-05
ODGL_Brain_Sun	38	hsa-miR-1469	7mer-a1	GCGCCGAT |||||||_ CGCGGCT-	6.10352e-05
PDC_Pancreas_Ishikawa	3	hsa-miR-369	7mer-a1	GTNGATCG |||||||_ CAGCTAG-	6.10352e-05
PPC_Prostate_Dhanasekaran	19	hsa-miR-101-3p	7mer-a1	AGATAACT _||||||| -CTATTGA	6.10352e-05
RCCC_Renal_Boer	7	hsa-miR-32 hsa-miR-92a hsa-miR-92b	7mer-m8	TGCAATAC |||||||_ ACGTTAT-	6.10352e-05
RCCC_Renal_Lenburg	2	hsa-miR-487b	8mer	GTANNATT |||||||| CATGCTAA	1.5259e-05
RCCC_Renal_Lenburg	3	hsa-miR-548f hsa-miR-548e hsa-miR-548x	7mer-m8	TANTTTTT _||||||| -TCAAAAA	6.10352e-05
SMCL_Lung_Bhattacharjee	16	hsa-miR-339-3p	7mer-a1	CGGCGCTC _||||||| -CCGCGAG	6.10352e-05
SMCL_Lung_Bhattacharjee	23	hsa-miR-3183	7mer-m8	GAGAGGCC |||||||_ CTCTCCG-	6.10352e-05
SMCL_Lung_Bhattacharjee	51	hsa-miR-1273	8mer	TGTNNCCC |||||||| ACAGCGGG	1.5259e-05
SMCL_Lung_Bhattacharjee	60	hsa-miR-671-3p	7mer-a1	GAACCKGC |||||||_ CTTGGCC-	6.10352e-05
SQ_Lung_Bhattacharjee	8	hsa-miR-1203	7mer-a1	CNCTCCGG _||||||| -CGAGGCC	6.10352e-05
SQ_Lung_Bhattacharjee	34	hsa-miR-718	8mer	GGNGGAAG |||||||| CCGCCTTC	1.5259e-05
SQ_Lung_Bhattacharjee	35	hsa-miR-449c-3p	7mer-m8	GCTAGCAA _||||||| -GATCGTT	6.10352e-05
SQ_Lung_Bhattacharjee	44	hsa-miR-4285	7mer-m8	TCNCCGCG |||||||_ AGCGGCG-	6.10352e-05
SRS_Ovarian_Hendrix	67	hsa-miR-886	7mer-a1	CCNACCCT |||||||_ GGCTGGG-	6.10352e-05
SRS_Ovarian_Hendrix	75	hsa-miR-937	7mer-a1	CGCGCGGA _||||||| -CGCGCCT	6.10352e-05
SRS_Ovarian_Hendrix	81	hsa-miR-3135	7mer-a1	CCTAGGNN |||||||_ GGATCCG-	6.10352e-05
TU_Prostate_Lapointe	14	hsa-miR-138-1-3p	7mer-a1	NNAAGTAG _||||||| -CTTCATC	6.10352e-05
TU_Prostate_Lapointe	24	hsa-miR-487b	8mer	GTANNATT |||||||| CATGCTAA	1.5259e-05
TU_Prostate_Lapointe	26	hsa-miR-566	7mer-m8	GGCGCCCG |||||||_ CCGCGGG-	6.10352e-05
TU_Prostate_Lapointe	40	hsa-miR-369	7mer-a1	GTNGATCG |||||||_ CAGCTAG-	6.10352e-05
