# Supplementary material for: A miRNA-regulatory network explains how dysregulated miRNAs perturb oncogenic processes across diverse cancers
Source: HighWire-hosted journal article supplement (doi:10.1101/gr.133991.111), 2012-06-28
Supplement: SuppTab5.xlsx [file SuppTab5.xlsx]

## Sheet: Sheet1
Supplementary Table 5.
Dataset	Cluster	miRNA	Uncorrected P-value	miR2Disease
AC Brain Sun	4	hsa-mir-222	0.000357084	glioma
AC Brain Sun	6	hsa-mir-1284	4.82582e-06	-
AC Brain Sun	7	hsa-mir-582-3p	1.18428e-05	-
AC Brain Sun	12	hsa-mir-485-3p	2.89267e-06	-
AC Brain Sun	19	hsa-mir-218	3.23071e-05	-
AC Brain Sun	32	hsa-mir-1266	0.000659312	-
AC Brain Sun	39	hsa-mir-1266	0.000177309	-
AC Brain Sun	46	hsa-mir-548c-3p	4.74976e-09	-
AC Brain Sun	50	hsa-mir-32	0.000138143	-
AC Brain Sun	51	hsa-mir-922	0.000626124	-
AD Lung Beer	1	hsa-mir-766	2.26137e-05	-
AD Lung Beer	3	hsa-mir-338	3.66087e-05	lung cancer
AD Lung Beer	7	hsa-mir-548b hsa-mir-548a hsa-mir-548d hsa-mir-548i hsa-mir-548j hsa-mir-548c hsa-mir-548h	2.52839e-05	-
AD Lung Beer	8	hsa-mir-939	9.03066e-05	-
AD Lung Beer	9	hsa-mir-548k	1.61026e-05	-
AD Lung Beer	11	hsa-mir-9	0.000564437	lung cancer|lung cancer|non-small cell lung cancer (NSCLC)
AD Lung Beer	12	hsa-mir-1208	7.52814e-05	-
AD Lung Beer	14	hsa-mir-571	4.6823e-06	-
AD Lung Beer	18	hsa-mir-876-3p	0.00023225	-
AD Lung Beer	24	hsa-mir-770	2.96835e-05	-
AD Lung Beer	27	hsa-mir-320 hsa-mir-320a hsa-mir-320b hsa-mir-320d	0.000120148	-
AD Lung Beer	28	hsa-mir-147	0.00058663	-
AD Lung Beer	29	hsa-mir-661	0.000210827	-
AD Lung Beer	31	hsa-mir-29 hsa-mir-29a hsa-mir-29b	5.80117e-06	lung cancer|lung cancer
AD Lung Beer	32	hsa-mir-656	0.000276057	-
AD Lung Beer	33	hsa-mir-380	0.000197824	-
AD Lung Beer	34	hsa-mir-193b	0.000113204	-
AD Lung Beer	35	hsa-mir-222	0.00017518	non-small cell lung cancer (NSCLC)
AD Lung Beer	40	hsa-mir-320 hsa-mir-320a hsa-mir-320b hsa-mir-320d	4.8001e-05	-
AD Lung Beer	44	hsa-mir-484	3.38406e-05	-
AD Lung Beer	46	hsa-mir-874	2.07358e-05	-
AD Lung Beer	51	hsa-mir-1202	0.00026996	-
AD Lung Beer	52	hsa-mir-372	0.000455224	non-small cell lung cancer (NSCLC)
AD Lung Beer	53	hsa-mir-581	3.77231e-06	-
AD Lung Bhattacharjee	2	hsa-mir-645	0.000246382	-
AD Lung Bhattacharjee	7	hsa-mir-570	3.96523e-05	-
AD Lung Bhattacharjee	14	hsa-mir-517 hsa-mir-517a	6.66571e-05	-
AD Lung Bhattacharjee	19	hsa-mir-1322	0.00026893	-
AD Lung Bhattacharjee	20	hsa-mir-599	8.73325e-05	-
AD Lung Bhattacharjee	22	hsa-mir-875-3p	2.4689e-05	-
AD Lung Bhattacharjee	28	hsa-mir-122	0.00016338	-
AD Lung Bhattacharjee	30	hsa-mir-607	1.31483e-05	-
AD Lung Bhattacharjee	33	hsa-mir-892a	0.000442944	-
AD Lung Bhattacharjee	39	hsa-mir-525-3p hsa-mir-524-3p	0.000313314	-
AD Lung Bhattacharjee	42	hsa-mir-760	0.000234775	-
AD Lung Bhattacharjee	44	hsa-mir-633	9.94888e-06	-
AD Lung Bhattacharjee	46	hsa-mir-548a-3p hsa-mir-548e hsa-mir-548f	4.38408e-07	-
AD Lung Bhattacharjee	47	hsa-mir-409-3p	1.02341e-05	-
AD Lung Bhattacharjee	49	hsa-mir-567	0.000411819	-
AD Lung Bhattacharjee	53	hsa-mir-146b hsa-mir-146a	0.000204499	lung cancer
AD Lung Bhattacharjee	58	hsa-mir-655	2.47932e-05	-
AD Lung Bhattacharjee	59	hsa-mir-29 hsa-mir-29a hsa-mir-29b	6.03969e-07	lung cancer|lung cancer
AD Lung Bhattacharjee	60	hsa-mir-190b hsa-mir-190	9.4998e-06	-
AD Lung Bhattacharjee	67	hsa-mir-361	0.000188291	-
AD Lung Bhattacharjee	69	hsa-mir-23b hsa-mir-23a	2.83176e-06	-
AD Lung Bhattacharjee	72	hsa-mir-507 hsa-mir-557	5.02053e-05	-
AD Lung Bhattacharjee	75	hsa-mir-1270 hsa-mir-620	0.000200137	-
AD Lung Bhattacharjee	76	hsa-mir-371-3p	3.22841e-05	-
AD Lung Stearman	0	hsa-mir-518a hsa-mir-527	7.8508e-06	-
AD Lung Stearman	7	hsa-mir-1269	8.42823e-05	-
AD Lung Stearman	9	hsa-mir-548g	0.000161471	-
AD Lung Stearman	13	hsa-mir-455	0.000102984	-
AD Lung Stearman	18	hsa-mir-1257	0.000200203	-
AD Lung Stearman	25	hsa-mir-200a hsa-mir-141	0.000459035	cancer|lung cancer
AD Lung Stearman	33	hsa-mir-196b hsa-mir-196a	9.41909e-05	-
AD Ovarian Welsh	0	hsa-mir-510	0.000176975	-
AD Ovarian Welsh	2	hsa-mir-122	0.00027714	-
AD Ovarian Welsh	3	hsa-mir-1283	2.11956e-05	-
AD Ovarian Welsh	5	hsa-mir-188-3p	0.000360695	-
AD Ovarian Welsh	7	hsa-mir-650	0.00037885	-
AD Ovarian Welsh	11	hsa-mir-1323 hsa-mir-548o	0.00020088	-
AD Ovarian Welsh	15	hsa-mir-1282	6.40654e-06	-
AD Ovarian Welsh	20	hsa-mir-767	0.000326469	-
AD Ovarian Welsh	21	hsa-mir-96	0.000127997	-
AD Ovarian Welsh	25	hsa-mir-572	6.53686e-06	ovarian cancer (OC)
AD Ovarian Welsh	26	hsa-mir-210	8.63242e-05	-
AD Ovarian Welsh	29	hsa-mir-1280	1.97329e-06	-
AD Ovarian Welsh	30	hsa-mir-1207	2.61663e-05	-
AD Ovarian Welsh	31	hsa-mir-380	0.000597339	-
AD Pancreas Logsdon	13	hsa-mir-486	0.000129758	-
AD Pancreas Logsdon	14	hsa-mir-517 hsa-mir-517a	4.14737e-05	-
AD Pancreas Logsdon	15	hsa-mir-556-3p	9.43819e-05	-
AD Pancreas Logsdon	16	hsa-mir-561	0.000136915	-
AO Brain Bredel	11	hsa-mir-608	1.92312e-05	-
AO Brain Bredel	13	hsa-mir-506	0.000219864	-
AO Brain Bredel	17	hsa-mir-191	3.22217e-05	-
AO Brain Bredel	20	hsa-mir-324	0.000220545	-
AO Brain Bredel	30	hsa-mir-1255b hsa-mir-1255a	0.000171809	-
AO Brain Bredel	33	hsa-mir-450b	0.000452261	-
AO Brain Bredel	35	hsa-mir-939	0.000489612	-
B-CLL Leukemia Haslinger	15	hsa-mir-338	6.08808e-05	-
B-CLL Leukemia Haslinger	21	hsa-mir-429 hsa-mir-200b hsa-mir-200	5.2337e-09	cancer
B-CLL Leukemia Haslinger	25	hsa-mir-1237	9.44076e-05	-
B-CLL Leukemia Haslinger	27	hsa-mir-760	1.18887e-07	-
B-CLL Leukemia Haslinger	29	hsa-mir-520f	0.000157234	-
B-CLL Leukemia Haslinger	30	hsa-mir-654-3p	0.000489152	-
B-CLL Leukemia Haslinger	34	hsa-mir-492	4.94643e-05	-
B-CLL Leukemia Haslinger	35	hsa-mir-1294	2.05001e-06	-
B-CLL Leukemia Haslinger	37	hsa-mir-545	2.30033e-05	-
B-CLL Leukemia Haslinger	40	hsa-mir-582-3p	0.000202998	-
B-CLL Leukemia Haslinger	46	hsa-mir-1249	0.000175139	-
B-CLL Leukemia Haslinger	48	hsa-mir-520d hsa-mir-524	0.000143885	-
B-CLL Leukemia Haslinger	49	hsa-mir-660	0.000361137	-
B-CLL Leukemia Haslinger	52	hsa-mir-323-3p	0.000171267	-
B-CLL Leukemia Haslinger	53	hsa-mir-513a-3p	5.06337e-05	-
B-CLL Leukemia Haslinger	55	hsa-mir-1323 hsa-mir-548o	2.12104e-07	-
B-CLL Leukemia Haslinger	59	hsa-mir-636	1.64642e-05	-
B-CLL Leukemia Haslinger	62	hsa-mir-515	2.64663e-05	-
B-CLL Leukemia Haslinger	64	hsa-mir-1278	0.000299993	-
B-CLL Leukemia Haslinger	68	hsa-mir-377	0.000193905	-
B-CLL Leukemia Haslinger	69	hsa-mir-532	0.000295895	-
BPH Prostate Dhanasekaran	4	hsa-mir-543	1.06032e-05	-
BPH Prostate Dhanasekaran	5	hsa-mir-1283	0.000141737	-
BPH Prostate Dhanasekaran	6	hsa-mir-648	0.000281772	-
BPH Prostate Dhanasekaran	7	hsa-mir-508	0.000256525	-
BPH Prostate Dhanasekaran	8	hsa-mir-891b	7.31332e-05	-
BPH Prostate Dhanasekaran	10	hsa-mir-1290	0.000500185	-
BPH Prostate Dhanasekaran	11	hsa-mir-520d hsa-mir-524	5.07776e-05	-
BPH Prostate Dhanasekaran	12	hsa-mir-33b hsa-mir-33a	0.000395585	-
BPH Prostate Dhanasekaran	15	hsa-mir-770	2.71257e-05	-
BPH Prostate Dhanasekaran	16	hsa-mir-548e	4.60183e-05	-
CA Bladder Dyrskjot	0	hsa-mir-607	6.23325e-05	-
CA Bladder Dyrskjot	1	hsa-mir-940	1.95112e-05	-
CA Bladder Dyrskjot	8	hsa-mir-140-3p	0.000606179	-
CA Bladder Dyrskjot	9	hsa-mir-452	6.57363e-08	bladder cancer
CA Bladder Dyrskjot	12	hsa-mir-607	0.000333178	-
CA Bladder Dyrskjot	16	hsa-mir-1205	4.42079e-05	-
CA Bladder Dyrskjot	19	hsa-mir-659	0.00021994	-
CA Bladder Dyrskjot	21	hsa-mir-590-3p	0.000292987	-
CA Bladder Dyrskjot	25	hsa-mir-550	0.000110985	-
CA Bladder Dyrskjot	26	hsa-mir-1224	9.14654e-06	-
CA Bladder Dyrskjot	27	hsa-mir-365	1.19399e-05	-
CA Bladder Dyrskjot	31	hsa-mir-520d hsa-mir-524	0.000672309	-
CA Bladder Dyrskjot	32	hsa-mir-320 hsa-mir-320a hsa-mir-320b hsa-mir-320d	3.18773e-06	-
CA Bladder Dyrskjot	36	hsa-mir-548n	2.23595e-07	-
CA Bladder Dyrskjot	42	hsa-mir-1183	4.29862e-05	-
CA Bladder Dyrskjot	47	hsa-mir-331	1.08229e-05	-
CA Bladder Dyrskjot	51	hsa-mir-1276	0.000118306	-
CA Bladder Dyrskjot	53	hsa-mir-1206	3.9724e-05	-
CA Bladder Dyrskjot	56	hsa-mir-335	8.82359e-06	-
CA Bladder Dyrskjot	64	hsa-mir-590-3p	3.57845e-12	-
CA Bladder Dyrskjot	66	hsa-mir-1827	0.00059065	-
CA Bladder Dyrskjot	71	hsa-mir-633	4.24907e-05	-
CA Bladder Dyrskjot	75	hsa-mir-487a	0.000410448	-
CA Bladder Dyrskjot	79	hsa-mir-147b	4.66399e-05	-
CA Bladder Dyrskjot	81	hsa-mir-455-3p	0.000167082	-
CA Bladder Dyrskjot	82	hsa-mir-519d	0.000101549	-
CA Breast Richardson	2	hsa-mir-590-3p	9.04896e-05	-
CA Breast Richardson	4	hsa-mir-433	5.09995e-05	-
CA Breast Richardson	13	hsa-mir-590-3p	8.3407e-05	-
CA Breast Richardson	32	hsa-mir-1245	3.51365e-05	-
CA Breast Richardson	33	hsa-mir-876	0.000262306	-
CA Breast Richardson	34	hsa-mir-410	2.78779e-07	-
CA Breast Richardson	38	hsa-mir-1271	5.67845e-05	-
CA Breast Richardson	43	hsa-mir-1246	0.000277995	-
CA Breast Richardson	45	hsa-mir-181d hsa-mir-181b	0.000100856	breast cancer
CA Breast Richardson	46	hsa-mir-323-3p	3.35344e-05	-
CA Breast Richardson	53	hsa-mir-548m	1.83913e-05	-
CA Breast Richardson	55	hsa-mir-130b hsa-mir-301a hsa-mir-301b hsa-mir-130a hsa-mir-454	0.000665578	-
CA Breast Richardson	56	hsa-mir-146b hsa-mir-146a	0.000198109	breast cancer
CA Breast Sorlie	2	hsa-mir-653	0.000159728	-
CA Breast Sorlie	5	hsa-mir-220	0.000125447	-
CA Breast Sorlie	8	hsa-mir-494	0.000325493	-
CA Breast Sorlie	10	hsa-mir-23b hsa-mir-23a	0.000228613	-
CA Breast Sorlie	11	hsa-mir-33a	0.000170146	-
CA Breast Sorlie	12	hsa-mir-548c-3p	0.00053872	-
CA Breast Sorlie	14	hsa-mir-632	0.000123817	-
CA Breast Sorlie	18	hsa-mir-490-3p	0.000434944	-
CA Breast Sorlie	19	hsa-mir-155	6.17095e-05	breast cancer|breast cancer|breast cancer|breast cancer
CA Breast Sorlie	20	hsa-mir-1279	9.67052e-07	-
CA Colon Graudens	2	hsa-mir-551b hsa-mir-551a	2.40995e-05	-
CA Colon Graudens	3	hsa-mir-552	0.000397074	-
CA Colon Graudens	8	hsa-mir-595	0.000150353	-
CA Colon Graudens	9	hsa-mir-338-3p	0.000383018	-
CA Colon Graudens	14	hsa-mir-1244	0.000207966	-
CA Colon Graudens	17	hsa-mir-642	0.000254189	-
CA Colon Graudens	19	hsa-mir-148a	6.27547e-05	-
CA Colon Graudens	24	hsa-mir-381 hsa-mir-300	1.02797e-05	-
CA Colon Graudens	25	hsa-mir-202	0.000193429	-
CA Colon Graudens	28	hsa-mir-566	0.000134232	-
CA Colon Graudens	29	hsa-mir-337-3p	0.00025569	-
CA Colon Graudens	30	hsa-mir-125b hsa-mir-125a	0.000141991	colorectal cancer|colorectal cancer
CA Colon Graudens	35	hsa-mir-325	1.26916e-06	-
CA Colon Graudens	36	hsa-mir-576	0.000293879	-
CA Colon Graudens	38	hsa-mir-320 hsa-mir-320a hsa-mir-320b hsa-mir-320d	9.49435e-06	colorectal cancer|colorectal cancer
CA Colon Graudens	39	hsa-mir-873	1.14381e-05	-
CA Colon Graudens	40	hsa-mir-507 hsa-mir-557	0.000113046	-
CA Colon Graudens	41	hsa-mir-1243	9.01746e-05	-
CA Renal Higgins	1	hsa-mir-590-3p	0.000514794	-
CA Renal Higgins	10	hsa-mir-875-3p	3.1331e-05	-
CA Renal Higgins	13	hsa-mir-423	4.95277e-06	-
CA Renal Higgins	14	hsa-mir-140	0.000244644	-
CCC Ovarian Hendrix	1	hsa-mir-1200	0.000441527	-
CCC Ovarian Hendrix	4	hsa-mir-194	2.9157e-06	-
CCC Ovarian Hendrix	7	hsa-mir-532	0.000214675	-
CCC Ovarian Hendrix	11	hsa-mir-29 hsa-mir-29a hsa-mir-29b	3.60964e-07	ovarian cancer (OC)
CCC Ovarian Hendrix	12	hsa-mir-876	1.89403e-05	-
CCC Ovarian Hendrix	13	hsa-mir-143	1.93994e-05	epithelial ovarian cancer (EOC)
CCC Ovarian Hendrix	23	hsa-mir-105	0.00057308	epithelial ovarian cancer (EOC)
CCC Ovarian Hendrix	24	hsa-mir-19b hsa-mir-19a	0.000228997	-
CCC Ovarian Hendrix	25	hsa-mir-183	2.99405e-05	ovarian cancer (OC)
CCC Ovarian Hendrix	30	hsa-mir-590	6.39478e-05	-
CCC Ovarian Hendrix	33	hsa-mir-127	0.000208615	cancer|epithelial ovarian cancer (EOC)
CCC Ovarian Hendrix	35	hsa-mir-1283	0.000100312	-
CCC Ovarian Hendrix	37	hsa-mir-1302	9.90079e-05	-
CCC Ovarian Hendrix	42	hsa-mir-590-3p	3.94266e-05	-
CCC Ovarian Hendrix	45	hsa-mir-382	0.000105777	-
CCC Ovarian Hendrix	47	hsa-mir-548p	4.73697e-05	-
CCC Ovarian Hendrix	51	hsa-mir-1279	0.000323532	-
CCC Ovarian Hendrix	56	hsa-mir-409-3p	0.000166079	-
CCC Ovarian Hendrix	59	hsa-mir-552	2.64926e-05	-
CCC Ovarian Hendrix	60	hsa-mir-105	1.19961e-06	epithelial ovarian cancer (EOC)
CLL Lymphoma Alizadeh	0	hsa-mir-1283	9.52817e-05	-
CLL Lymphoma Alizadeh	3	hsa-mir-513b	1.10817e-05	-
CLL Lymphoma Alizadeh	7	hsa-mir-1263	9.63025e-05	-
CLL Lymphoma Alizadeh	8	hsa-mir-222	0.000378332	-
CLL Lymphoma Alizadeh	10	hsa-mir-21 hsa-mir-590	6.63044e-05	chronic lymphocytic leukemia (CLL)
COID Lung Bhattacharjee	0	hsa-mir-663	9.57079e-05	-
COID Lung Bhattacharjee	2	hsa-mir-548d-3p	0.000222684	-
COID Lung Bhattacharjee	3	hsa-mir-940	7.85222e-05	-
COID Lung Bhattacharjee	5	hsa-mir-361	0.000204845	-
COID Lung Bhattacharjee	7	hsa-mir-431	6.94443e-05	-
COID Lung Bhattacharjee	8	hsa-mir-607	0.000109642	-
COID Lung Bhattacharjee	9	hsa-mir-622	0.000578648	-
COID Lung Bhattacharjee	10	hsa-mir-513a-3p	9.26962e-06	-
COID Lung Bhattacharjee	11	hsa-mir-501	0.000106934	-
COID Lung Bhattacharjee	12	hsa-mir-509 hsa-mir-509-3	0.00045535	-
COID Lung Bhattacharjee	17	hsa-mir-885-3p	2.71482e-07	-
COID Lung Bhattacharjee	19	hsa-mir-553	2.93925e-05	-
COID Lung Bhattacharjee	21	hsa-mir-590-3p	0.000341529	-
COID Lung Bhattacharjee	25	hsa-mir-1276	1.52399e-05	-
COID Lung Bhattacharjee	28	hsa-mir-758	0.000192537	-
COID Lung Bhattacharjee	31	hsa-mir-331-3p	0.000462838	-
COID Lung Bhattacharjee	40	hsa-mir-1181	2.30748e-05	-
COID Lung Bhattacharjee	41	hsa-mir-1303	0.000150263	-
COID Lung Bhattacharjee	44	hsa-mir-504	3.9615e-05	-
COID Lung Bhattacharjee	47	hsa-mir-574-3p	2.47741e-05	-
COID Lung Bhattacharjee	60	hsa-mir-505	0.00037429	-
COID Lung Bhattacharjee	61	hsa-mir-494	1.42595e-05	-
COID Lung Bhattacharjee	67	hsa-mir-512-3p	0.000326325	-
COID Lung Bhattacharjee	71	hsa-mir-1237	0.000255541	-
COID Lung Bhattacharjee	73	hsa-mir-1262	0.000380974	-
COID Lung Bhattacharjee	74	hsa-mir-513a-3p	4.84588e-06	-
COID Lung Bhattacharjee	75	hsa-mir-1300	0.000178305	-
COID Lung Bhattacharjee	78	hsa-mir-920	0.000256218	-
COID Lung Bhattacharjee	81	hsa-mir-369-3p	3.11974e-05	-
COID Lung Bhattacharjee	86	hsa-mir-580	5.0482e-05	-
COID Lung Bhattacharjee	89	hsa-mir-1254	0.000134399	-
COID Lung Bhattacharjee	91	hsa-mir-1275	5.24712e-06	-
DLBCL Lymphoma Alizadeh	1	hsa-mir-138	3.63295e-05	-
DLBCL Lymphoma Alizadeh	5	hsa-mir-198	0.000115292	-
DLBCL Lymphoma Alizadeh	6	hsa-mir-542	1.19529e-05	-
DLBCL Lymphoma Alizadeh	7	hsa-mir-532-3p	3.77589e-05	-
DLBCL Lymphoma Alizadeh	9	hsa-mir-892b	0.000231852	-
DLBCL Lymphoma Alizadeh	10	hsa-mir-325	0.00021668	-
DLBCL Lymphoma Alizadeh	11	hsa-mir-1203	6.37967e-05	-
END Ovarian Hendrix	3	hsa-mir-510	1.60525e-06	-
END Ovarian Hendrix	4	hsa-mir-608	2.65843e-05	ovarian cancer (OC)
END Ovarian Hendrix	6	hsa-mir-29 hsa-mir-29a hsa-mir-29b	6.94717e-05	ovarian cancer (OC)
END Ovarian Hendrix	7	hsa-mir-1302	1.6851e-05	-
END Ovarian Hendrix	8	hsa-mir-200a hsa-mir-141	0.000119842	cancer|epithelial ovarian cancer (EOC)|ovarian cancer (OC)|ovarian cancer (OC)|ovarian cancer (OC)
END Ovarian Hendrix	13	hsa-mir-1276	0.000413656	-
END Ovarian Hendrix	18	hsa-mir-890	6.80674e-05	-
END Ovarian Hendrix	22	hsa-mir-15b hsa-mir-15a hsa-mir-16 hsa-mir-497 hsa-mir-195	0.000286656	ovarian cancer (OC)
END Ovarian Hendrix	23	hsa-mir-1259	0.000453022	-
END Ovarian Hendrix	25	hsa-mir-653	0.000151323	-
END Ovarian Hendrix	26	hsa-mir-548c-3p	1.03091e-05	-
END Ovarian Hendrix	32	hsa-mir-802	0.000186055	-
END Ovarian Hendrix	35	hsa-mir-1276	9.70721e-20	-
END Ovarian Hendrix	38	hsa-mir-944	0.000151186	-
END Ovarian Hendrix	39	hsa-mir-508	0.000310807	ovarian cancer (OC)
END Ovarian Hendrix	48	hsa-mir-125a-3p	0.000130068	-
END Ovarian Hendrix	50	hsa-mir-539	3.77714e-05	-
END Ovarian Hendrix	51	hsa-mir-130b hsa-mir-301a hsa-mir-301b hsa-mir-130a hsa-mir-454	6.35461e-05	-
END Ovarian Hendrix	60	hsa-mir-580	1.91723e-06	-
END Ovarian Hendrix	69	hsa-mir-607	0.000218523	-
END Ovarian Hendrix	82	hsa-mir-505	8.53648e-06	-
FL Lymphoma Alizadeh	4	hsa-mir-1295	1.5368e-05	-
FL Lymphoma Alizadeh	6	hsa-mir-338	0.000302414	follicular lymphoma (FL)
FL Lymphoma Alizadeh	9	hsa-mir-767-3p	0.000117612	-
FL Lymphoma Alizadeh	11	hsa-mir-148a hsa-mir-148b hsa-mir-152	0.000429493	-
GBM Brain Liang	12	hsa-mir-520g hsa-mir-520h	0.000557506	-
GBM Brain Liang	14	hsa-mir-125a-3p	0.000424903	-
GBM Brain Liang	15	hsa-mir-144	0.000662353	-
GBM Brain Liang	17	hsa-mir-600	0.00022619	-
GCT Seminoma Korkola	6	hsa-mir-34b	0.000166029	-
GCT Seminoma Korkola	8	hsa-mir-940	1.61693e-05	-
GCT Seminoma Korkola	14	hsa-mir-1323 hsa-mir-548o	3.11881e-05	-
GCT Seminoma Korkola	20	hsa-mir-632	4.08865e-05	-
GCT Seminoma Korkola	21	hsa-mir-548k	4.80591e-06	-
GCT Seminoma Korkola	25	hsa-mir-105	0.000213709	-
GCT Seminoma Korkola	26	hsa-mir-138	0.000182637	-
GCT Seminoma Korkola	31	hsa-mir-22	3.96913e-06	-
GCT Seminoma Korkola	36	hsa-mir-196b hsa-mir-196a	0.000488975	-
GCT Seminoma Korkola	37	hsa-mir-106b hsa-mir-17 hsa-mir-106a hsa-mir-93 hsa-mir-20b hsa-mir-20a	7.11875e-05	-
GCT Seminoma Korkola	38	hsa-mir-370	0.000160824	-
GCT Seminoma Korkola	39	hsa-mir-769	2.72297e-05	-
GCT Seminoma Korkola	40	hsa-mir-577	0.000614553	-
GCT Seminoma Korkola	42	hsa-mir-149	0.000282927	-
GCT Seminoma Korkola	47	hsa-mir-485	0.000532439	-
GCT Seminoma Korkola	56	hsa-mir-499-3p	0.000181753	-
GCT Seminoma Korkola	62	hsa-mir-548m	7.00343e-07	-
GCT Seminoma Korkola	66	hsa-mir-532-3p	0.000274953	-
GCT Seminoma Korkola	72	hsa-mir-490-3p	8.74385e-07	-
GCT Seminoma Korkola	74	hsa-let-7f hsa-let-7g hsa-let-7a hsa-let-7b hsa-let-7d hsa-let-7i hsa-mir-98 hsa-let-7	1.22948e-06	-
GCT Seminoma Korkola	75	hsa-mir-664	0.000114433	-
GCT Seminoma Korkola	76	hsa-mir-220b	5.79792e-05	-
GCT Seminoma Korkola	80	hsa-mir-623	8.84632e-05	-
GCT Seminoma Korkola	87	hsa-mir-1179	4.10886e-05	-
GCT Seminoma Korkola	88	hsa-mir-129	7.94106e-05	-
GCT Seminoma Korkola	89	hsa-mir-568	0.00034329	-
GCT Seminoma Korkola	90	hsa-mir-362	3.26922e-06	-
GCT Seminoma Korkola	93	hsa-mir-193a	0.000207726	-
GCT Seminoma Korkola	95	hsa-mir-1283	3.81175e-07	-
GCT Seminoma Korkola	98	hsa-mir-224	0.000173618	-
GCT Seminoma Korkola	100	hsa-mir-486-3p	0.000207588	-
GCT Seminoma Korkola	102	hsa-mir-125b hsa-mir-125a	5.67778e-06	-
GCT Seminoma Korkola	105	hsa-mir-34a hsa-mir-34c hsa-mir-449a hsa-mir-449b	0.000332836	-
GCT Seminoma Korkola	107	hsa-mir-199b-3p hsa-mir-199a-3p	0.000212588	cancer
GCT Seminoma Korkola	108	hsa-mir-570	0.000279799	-
GCT Seminoma Korkola	109	hsa-mir-548p	5.74089e-06	-
GCT Seminoma Korkola	110	hsa-mir-18a hsa-mir-18b	2.69643e-05	-
GCT Seminoma Korkola	112	hsa-mir-590-3p	5.48699e-06	-
GL Brain Bredel	0	hsa-mir-1208	9.30766e-05	-
GL Brain Bredel	9	hsa-mir-549	0.000116643	-
GL Brain Bredel	11	hsa-mir-542-3p	0.000201348	-
GL Brain Bredel	12	hsa-mir-384	0.000466337	-
GL Brain Bredel	15	hsa-mir-654-3p	6.03577e-07	-
GL Brain Bredel	20	hsa-mir-487b	0.000468745	-
GL Brain Bredel	21	hsa-mir-633	6.37948e-05	-
GL Brain Bredel	24	hsa-mir-1245	0.000261253	-
GL Brain Bredel	25	hsa-mir-338	0.000377267	-
GL Brain Bredel	33	hsa-mir-625	0.000450263	-
GL Brain Bredel	36	hsa-mir-661	0.000100239	-
GL Brain Bredel	37	hsa-mir-544	0.000666316	-
GL Brain Bredel	39	hsa-mir-363	0.000215653	-
GL Brain Bredel	40	hsa-mir-526b	0.000108823	-
GL Brain Bredel	41	hsa-mir-484	0.000147486	-
GL Brain Bredel	46	hsa-mir-154	0.000413209	-
GL Brain Bredel	54	hsa-mir-582-3p	5.64139e-05	-
GL Brain Bredel	57	hsa-mir-769-3p hsa-mir-450b-3p	5.60506e-05	-
GL Brain Bredel	59	hsa-mir-125a-3p	2.04269e-06	-
GL Brain Bredel	60	hsa-mir-513a	0.000188295	-
GL Brain Bredel	61	hsa-mir-572	5.05181e-06	-
GL Brain Bredel	64	hsa-mir-220b	9.87545e-05	-
GL Brain Bredel	65	hsa-mir-532	0.000243031	-
GL Brain Bredel	71	hsa-mir-651	0.000504986	-
GL Brain Bredel	75	hsa-mir-889	0.000677584	-
GL Brain Rickman	1	hsa-mir-493	3.60649e-05	-
GL Brain Rickman	4	hsa-mir-302f	3.03515e-05	-
GL Brain Rickman	9	hsa-mir-1207	0.000100819	-
GL Brain Rickman	11	hsa-mir-653	8.20964e-05	-
GL Brain Rickman	13	hsa-mir-486-3p	0.000165893	-
GL Brain Rickman	14	hsa-mir-149	0.000224784	glioblastoma multiforme (GBM)
GL Brain Rickman	21	hsa-mir-624	8.27826e-05	-
GL Brain Rickman	22	hsa-mir-542-3p	5.92509e-05	-
GL Brain Rickman	23	hsa-mir-490	1.28236e-05	-
GL Brain Rickman	29	hsa-mir-544	3.71242e-06	-
GL Brain Rickman	31	hsa-let-7e hsa-let-7f hsa-let-7g hsa-let-7a hsa-let-7b hsa-let-7d hsa-let-7i hsa-mir-98 hsa-let-7	1.86166e-05	-
GL Brain Rickman	34	hsa-mir-125a-3p	5.66898e-05	-
GLB Brain Sun	1	hsa-mir-767	9.57166e-05	-
GLB Brain Sun	2	hsa-mir-577	0.000325921	-
GLB Brain Sun	8	hsa-mir-140-3p	6.49318e-07	-
GLB Brain Sun	10	hsa-mir-588	2.75943e-05	-
GLB Brain Sun	12	hsa-mir-924	0.000279414	-
GLB Brain Sun	14	hsa-mir-1299	0.0006165	-
GLB Brain Sun	15	hsa-mir-582-3p	6.41912e-06	-
GLB Brain Sun	17	hsa-mir-621	4.2194e-05	-
GLB Brain Sun	18	hsa-mir-655	2.73737e-05	-
GLB Brain Sun	20	hsa-mir-556-3p	1.55567e-05	-
GLB Brain Sun	21	hsa-mir-188	0.000650779	-
GLB Brain Sun	24	hsa-mir-381 hsa-mir-300	6.92041e-05	-
GLB Brain Sun	27	hsa-mir-590-3p	0.000472328	-
GLB Brain Sun	28	hsa-mir-369-3p	5.05212e-05	-
GLB Brain Sun	31	hsa-mir-936	1.06618e-05	-
GLB Brain Sun	40	hsa-mir-1274a	0.000402525	-
GLB Brain Sun	41	hsa-mir-760	7.71212e-09	-
GLB Brain Sun	43	hsa-mir-331	5.3367e-05	-
GLB Brain Sun	50	hsa-mir-664	6.68788e-05	-
GLB Brain Sun	51	hsa-mir-28-3p	0.000446009	-
GLB Brain Sun	54	hsa-mir-548m	5.71848e-06	-
GLB Brain Sun	62	hsa-mir-216a	0.000157554	-
GLB Brain Sun	67	hsa-mir-544	4.07162e-07	-
GLB Brain Sun	68	hsa-mir-888	7.93032e-05	-
GLB Brain Sun	69	hsa-mir-1288	0.000168213	-
GLB Brain Sun	71	hsa-mir-1182	0.000395608	-
GLB Brain Sun	72	hsa-mir-571	6.08662e-05	-
GLB Brain Sun	76	hsa-mir-561	3.81571e-05	-
HSCC Head-Neck Chung	1	hsa-mir-767	9.69523e-05	-
HSCC Head-Neck Chung	2	hsa-mir-148a hsa-mir-148b hsa-mir-152	0.000575605	head and neck squamous cell carcinoma (HNSCC)|Oral Squamous Cell Carcinoma (OSCC)
HSCC Head-Neck Chung	7	hsa-mir-487a	4.22725e-05	-
HSCC Head-Neck Chung	10	hsa-mir-1226	0.000450182	-
HSCC Head-Neck Cromer	3	hsa-mir-496	2.70624e-05	-
HSCC Head-Neck Cromer	11	hsa-mir-129	4.13138e-05	-
HSCC Head-Neck Cromer	12	hsa-mir-1297 hsa-mir-26a hsa-mir-26b	3.3554e-05	Oral Squamous Cell Carcinoma (OSCC)
HSCC Head-Neck Cromer	13	hsa-mir-875-3p	1.97705e-05	-
HSCC Head-Neck Cromer	18	hsa-mir-214	0.000212009	head and neck squamous cell carcinoma (HNSCC)
HSCC Head-Neck Cromer	20	hsa-mir-543	0.000173579	-
HSCC Head-Neck Cromer	22	hsa-mir-218	0.000659831	-
HSCC Head-Neck Cromer	23	hsa-mir-380	0.000341454	-
HSCC Head-Neck Cromer	25	hsa-mir-1264	7.11851e-05	-
HSCC Head-Neck Cromer	26	hsa-mir-199a hsa-mir-199b	0.000146104	cancer|Oral Squamous Cell Carcinoma (OSCC)|Oral Squamous Cell Carcinoma (OSCC)|Oral Squamous Cell Carcinoma (OSCC)
IDC Breast Radvanyi	4	hsa-mir-661	0.00019994	breast cancer
IDC Breast Radvanyi	5	hsa-mir-1274a	9.34926e-05	-
IDC Breast Radvanyi	6	hsa-mir-652	4.44324e-06	-
IDC Breast Radvanyi	8	hsa-mir-1273	1.22785e-05	-
IDC Breast Radvanyi	14	hsa-mir-556	0.000534734	-
IDC Breast Radvanyi	15	hsa-mir-182	2.40128e-05	breast cancer
IDC Breast Radvanyi	16	hsa-mir-9	0.000460178	breast cancer|breast cancer|breast cancer
IDC Breast Radvanyi	21	hsa-mir-493	0.000515054	-
IDC Breast Radvanyi	22	hsa-mir-1274a	0.000321613	-
IDC Breast Radvanyi	34	hsa-mir-532	6.62383e-05	-
IDC Breast Radvanyi	35	hsa-mir-488	0.000481039	-
IDC Breast Radvanyi	41	hsa-mir-361-3p	5.52348e-05	-
IDC Breast Radvanyi	44	hsa-mir-548a-3p	0.000104312	-
IDC Breast Radvanyi	47	hsa-mir-760	0.000124285	-
IDC Breast Radvanyi	48	hsa-mir-630	0.000196602	-
IDC Breast Radvanyi	51	hsa-mir-548l	0.000143163	-
IDC Breast Radvanyi	54	hsa-mir-1277	0.000645264	-
IDC Breast Radvanyi	56	hsa-mir-216b	0.000135939	-
IDC Breast Radvanyi	60	hsa-mir-923	4.22085e-05	-
ILC Breast Radvanyi	4	hsa-mir-122	1.22472e-06	-
ILC Breast Radvanyi	5	hsa-mir-501	0.000523698	-
ILC Breast Radvanyi	19	hsa-mir-663b	3.72552e-05	-
ILC Breast Radvanyi	22	hsa-mir-508-3p	0.000193266	-
MCA Breast Radvanyi	7	hsa-mir-595	0.000118204	-
MCA Breast Radvanyi	12	hsa-mir-489	0.000319697	-
MCA Breast Radvanyi	21	hsa-mir-626	0.000107826	-
ME Melanoma Hoek	0	hsa-mir-34b	9.82464e-05	malignant melanoma
ME Melanoma Hoek	3	hsa-mir-1308	9.97036e-05	-
ME Melanoma Hoek	6	hsa-mir-410	6.65023e-05	-
ME Melanoma Hoek	9	hsa-mir-106b hsa-mir-17 hsa-mir-106a hsa-mir-93 hsa-mir-20b hsa-mir-20a	0.000626339	malignant melanoma
ME Melanoma Hoek	12	hsa-mir-892a	2.64822e-05	-
ME Melanoma Hoek	15	hsa-mir-217	5.33066e-05	-
ME Melanoma Hoek	23	hsa-mir-32	0.000286963	-
ME Melanoma Hoek	35	hsa-mir-200b hsa-mir-200	4.36664e-05	cancer|malignant melanoma
ME Melanoma Hoek	39	hsa-mir-212 hsa-mir-132	9.97954e-05	-
ME Melanoma Hoek	41	hsa-mir-938	4.28159e-08	-
ME Melanoma Hoek	44	hsa-mir-1299	3.96474e-05	-
ME Melanoma Hoek	47	hsa-mir-549	5.9091e-05	-
ME Melanoma Hoek	50	hsa-mir-548c-3p	0.000144326	-
ML Melanoma Talantov	0	hsa-mir-603	0.000216878	-
ML Melanoma Talantov	3	hsa-mir-181a hsa-mir-181	2.83111e-06	malignant melanoma
ML Melanoma Talantov	7	hsa-mir-125b hsa-mir-125a	4.64328e-05	malignant melanoma
ML Melanoma Talantov	9	hsa-mir-151-3p	0.000153257	-
ML Melanoma Talantov	10	hsa-mir-623	4.84804e-05	-
ML Melanoma Talantov	12	hsa-mir-125b hsa-mir-125a	0.000126841	malignant melanoma
ML Melanoma Talantov	14	hsa-mir-519a hsa-mir-519c-3p hsa-mir-519b-3p	2.70367e-07	-
ML Melanoma Talantov	19	hsa-mir-421	0.000150563	-
ML Melanoma Talantov	22	hsa-mir-520d hsa-mir-524	3.48401e-05	-
ML Melanoma Talantov	23	hsa-mir-548p	7.56974e-06	-
ML Melanoma Talantov	25	hsa-mir-606	0.000376617	-
ML Melanoma Talantov	26	hsa-mir-607	5.49882e-05	-
ML Melanoma Talantov	34	hsa-mir-767-3p	3.80682e-06	-
MM Myeloma Zhan	1	hsa-mir-519e	0.000195242	-
MM Myeloma Zhan	2	hsa-mir-587	0.00038156	-
MM Myeloma Zhan	3	hsa-mir-590-3p	2.57363e-08	-
MM Myeloma Zhan	4	hsa-mir-361-3p	0.00038289	-
MM Myeloma Zhan	6	hsa-mir-516b	5.94615e-05	-
MM Myeloma Zhan	7	hsa-mir-510	0.000138587	-
MM Myeloma Zhan	9	hsa-mir-9	0.000100248	-
MM Myeloma Zhan	13	hsa-mir-655	7.498e-05	-
MM Myeloma Zhan	17	hsa-mir-320 hsa-mir-320a hsa-mir-320b hsa-mir-320d	8.22528e-06	-
MM Myeloma Zhan	20	hsa-mir-1226	3.53496e-05	-
MM Myeloma Zhan	21	hsa-mir-183	0.000548746	-
MM Myeloma Zhan	22	hsa-mir-1236	0.000330323	-
MM Myeloma Zhan	24	hsa-mir-140-3p	4.31289e-05	multiple myeloma (MM)
MM Myeloma Zhan	25	hsa-mir-188	0.000241687	-
MM Myeloma Zhan	29	hsa-mir-760	1.88291e-08	-
MM Myeloma Zhan	30	hsa-mir-588	0.000131928	-
MM Myeloma Zhan	31	hsa-mir-597	0.000240387	-
MM Myeloma Zhan	32	hsa-mir-212 hsa-mir-132	0.000138448	-
MM Myeloma Zhan	35	hsa-mir-650	0.000432285	-
MM Myeloma Zhan	40	hsa-mir-382	0.000167046	-
MM Myeloma Zhan	43	hsa-mir-23b hsa-mir-23a	1.74419e-05	-
MM Myeloma Zhan	45	hsa-mir-595	0.00024781	-
MM Myeloma Zhan	46	hsa-mir-425	5.53966e-05	-
MM Myeloma Zhan	47	hsa-mir-875-3p	0.000422238	-
MPC Prostate Dhanasekaran	0	hsa-mir-1323 hsa-mir-548o	6.62345e-07	-
MPC Prostate Dhanasekaran	7	hsa-mir-330 hsa-mir-326	6.19724e-05	prostate cancer
MPC Prostate Dhanasekaran	9	hsa-mir-190b hsa-mir-190	2.92257e-06	-
MPC Prostate Dhanasekaran	12	hsa-mir-139	7.63254e-07	-
MPC Prostate Dhanasekaran	13	hsa-mir-1257	8.36689e-06	-
MPC Prostate Dhanasekaran	14	hsa-mir-133b hsa-mir-133a	0.00010216	-
MPC Prostate Dhanasekaran	16	hsa-mir-944	7.2201e-07	-
MPC Prostate Dhanasekaran	19	hsa-mir-661	1.85267e-05	-
MPC Prostate Dhanasekaran	21	hsa-mir-498	0.000467932	prostate cancer
MPC Prostate Dhanasekaran	22	hsa-mir-105	2.03268e-05	-
MPC Prostate Dhanasekaran	26	hsa-mir-935	0.000148827	-
MPC Prostate Dhanasekaran	30	hsa-mir-659	0.000152617	-
MPC Prostate Dhanasekaran	34	hsa-mir-544	6.80814e-07	-
MPC Prostate Dhanasekaran	35	hsa-mir-203	0.000205357	-
MPC Prostate Dhanasekaran	44	hsa-mir-1323 hsa-mir-548o	1.09947e-06	-
MPC Prostate Dhanasekaran	45	hsa-mir-490-3p	1.6997e-06	-
MPM Mesothelioma Gordon	7	hsa-mir-526b	7.15644e-05	-
MPM Mesothelioma Gordon	11	hsa-mir-491-3p	3.42045e-05	-
MPM Mesothelioma Gordon	14	hsa-mir-361-3p	9.99543e-05	-
MPM Mesothelioma Gordon	16	hsa-mir-548m	3.90419e-08	-
MPM Mesothelioma Gordon	27	hsa-mir-1301	4.8397e-05	-
MPM Mesothelioma Gordon	35	hsa-mir-371	0.000204415	-
MPM Mesothelioma Gordon	38	hsa-mir-1276	8.53163e-06	-
MPM Mesothelioma Gordon	41	hsa-mir-519e	0.000107989	-
MPM Mesothelioma Gordon	42	hsa-mir-183	0.00048608	-
MPM Mesothelioma Gordon	48	hsa-mir-561	0.000418507	-
MPM Mesothelioma Gordon	51	hsa-mir-605	6.36007e-05	-
MPM Mesothelioma Gordon	53	hsa-mir-1182	0.00019028	-
MPM Mesothelioma Gordon	56	hsa-mir-595	4.64997e-05	Malignant mesothelioma (MM)
MPM Mesothelioma Gordon	61	hsa-mir-545	5.77377e-05	-
MPM Mesothelioma Gordon	62	hsa-mir-1279	0.000304825	-
MPM Mesothelioma Gordon	63	hsa-mir-548b hsa-mir-548a hsa-mir-548d hsa-mir-548i hsa-mir-548j hsa-mir-548c hsa-mir-548h	3.46701e-06	-
MPM Mesothelioma Gordon	65	hsa-mir-590-3p	0.00046845	-
MUC Ovarian Hendrix	0	hsa-mir-556-3p	1.08759e-05	-
MUC Ovarian Hendrix	2	hsa-mir-22	0.00025469	-
MUC Ovarian Hendrix	7	hsa-mir-607	0.000283493	-
MUC Ovarian Hendrix	8	hsa-mir-1226	4.83859e-05	-
MUC Ovarian Hendrix	14	hsa-mir-148a hsa-mir-148b hsa-mir-152	8.42768e-05	epithelial ovarian cancer (EOC)
MUC Ovarian Hendrix	15	hsa-mir-340	1.89445e-05	-
MUC Ovarian Hendrix	18	hsa-mir-548n	0.000222366	-
MUC Ovarian Hendrix	21	hsa-mir-216b	0.000279976	-
MUC Ovarian Hendrix	25	hsa-mir-548c-3p	1.01655e-05	-
MUC Ovarian Hendrix	41	hsa-mir-34a hsa-mir-34c hsa-mir-449a hsa-mir-449b	0.000165758	ovarian cancer (OC)|ovarian cancer (OC)
MUC Ovarian Hendrix	44	hsa-mir-217	0.000155736	-
MUC Ovarian Hendrix	45	hsa-mir-765	8.96607e-05	-
MUC Ovarian Hendrix	57	hsa-mir-766	0.000194385	-
MUC Ovarian Hendrix	60	hsa-mir-369-3p	0.000117663	-
MUC Ovarian Hendrix	61	hsa-mir-940	2.21667e-05	-
MUC Ovarian Hendrix	63	hsa-mir-184	3.30852e-05	epithelial ovarian cancer (EOC)
MUC Ovarian Hendrix	67	hsa-mir-1224-3p	0.000283759	-
MUC Ovarian Hendrix	68	hsa-mir-606	8.68405e-06	-
MUC Ovarian Hendrix	71	hsa-mir-361-3p	0.00031521	-
MUC Ovarian Hendrix	74	hsa-mir-27a hsa-mir-27b	0.000125726	-
MUC Ovarian Hendrix	76	hsa-mir-144	9.98026e-05	-
OD Brain Bredel	2	hsa-mir-768	2.71508e-05	-
OD Brain Bredel	3	hsa-mir-615-3p	0.000123587	-
OD Brain Bredel	8	hsa-mir-651	0.000193833	-
OD Brain Bredel	9	hsa-mir-548e	0.000425304	-
OD Brain Bredel	12	hsa-mir-588	9.4754e-05	-
OD Brain Bredel	18	hsa-mir-1261	0.00060741	-
OD Brain Bredel	19	hsa-mir-487a	0.000532445	-
OD Brain Bredel	21	hsa-mir-369-3p	6.82064e-05	-
OD Brain Bredel	24	hsa-mir-193a-3p	0.000341762	-
OD Brain Bredel	25	hsa-mir-512-3p	0.000343389	-
OD Brain Bredel	33	hsa-mir-1231	4.51369e-05	-
OD Brain Bredel	41	hsa-mir-1276	5.88246e-05	-
OD Brain Bredel	43	hsa-mir-412	0.000207539	-
OD Brain Bredel	45	hsa-mir-324	0.000220545	-
OD Brain Bredel	52	hsa-mir-325	0.000190267	-
OD Brain Bredel	56	hsa-mir-126	1.36617e-05	-
OD Brain Bredel	57	hsa-mir-148b hsa-mir-152	1.28407e-05	-
ODGL Brain Sun	9	hsa-mir-142-3p	2.46207e-05	-
ODGL Brain Sun	18	hsa-mir-1274b	4.98629e-05	-
ODGL Brain Sun	20	hsa-mir-570	1.84116e-05	-
ODGL Brain Sun	25	hsa-mir-548p	2.42643e-05	-
ODGL Brain Sun	26	hsa-mir-622	0.000200859	-
ODGL Brain Sun	31	hsa-mir-490-3p	0.00051022	-
ODGL Brain Sun	33	hsa-mir-335	4.8491e-05	-
ODGL Brain Sun	36	hsa-mir-361-3p	5.23288e-06	-
ODGL Brain Sun	39	hsa-mir-218	0.000131483	-
ODGL Brain Sun	41	hsa-mir-374b hsa-mir-374a	1.5246e-05	-
ODGL Brain Sun	44	hsa-mir-1276	0.00049542	-
ODGL Brain Sun	50	hsa-mir-548c-3p	3.15491e-05	-
ODGL Brain Sun	52	hsa-mir-1270 hsa-mir-620	6.90679e-05	-
ODGL Brain Sun	53	hsa-mir-548m	9.38924e-05	-
ODGL Brain Sun	58	hsa-mir-181d hsa-mir-181b	2.71785e-05	glioma
ODGL Brain Sun	60	hsa-mir-556-3p	0.000290266	-
ODGL Brain Sun	64	hsa-mir-539	0.00028035	-
ODGL Brain Sun	65	hsa-mir-340	3.02347e-06	-
PPC Prostate Dhanasekaran	0	hsa-mir-558	0.000302978	-
PPC Prostate Dhanasekaran	1	hsa-mir-520d hsa-mir-524	0.000129964	-
PPC Prostate Dhanasekaran	2	hsa-mir-217	0.000339362	-
PPC Prostate Dhanasekaran	3	hsa-mir-624	0.000227035	-
PPC Prostate Dhanasekaran	4	hsa-mir-760	0.000111326	-
PPC Prostate Dhanasekaran	9	hsa-mir-153	1.70214e-06	-
PPC Prostate Dhanasekaran	10	hsa-mir-421	0.000113825	-
PPC Prostate Dhanasekaran	11	hsa-mir-628-3p	4.46157e-05	-
PPC Prostate Dhanasekaran	14	hsa-mir-34a hsa-mir-34c hsa-mir-449a hsa-mir-449b	0.00044845	prostate cancer
PPC Prostate Dhanasekaran	19	hsa-mir-548e	4.34408e-07	-
PPC Prostate Dhanasekaran	22	hsa-mir-802	1.01426e-05	-
PPC Prostate Dhanasekaran	23	hsa-mir-376	8.07585e-05	-
PPC Prostate Dhanasekaran	27	hsa-mir-654-3p	0.000130064	-
PPC Prostate Dhanasekaran	28	hsa-mir-544	1.12014e-10	-
PPC Prostate Dhanasekaran	41	hsa-mir-18a hsa-mir-18b	1.28396e-05	-
RCCC Renal Boer	0	hsa-mir-140-3p	0.000185774	-
RCCC Renal Boer	3	hsa-mir-217	0.000238884	-
RCCC Renal Boer	4	hsa-mir-1262	0.0004252	-
RCCC Renal Boer	8	hsa-mir-1206	0.000348303	-
RCCC Renal Boer	9	hsa-mir-1256	0.000206072	-
RCCC Renal Boer	12	hsa-mir-760	0.000652786	-
RCCC Renal Boer	13	hsa-mir-200a hsa-mir-141	6.73573e-05	cancer
RCCC Renal Boer	14	hsa-mir-590-3p	0.000647061	-
RCCC Renal Boer	15	hsa-mir-548k	0.000242163	-
RCCC Renal Lenburg	6	hsa-mir-651	0.000604766	-
RCCC Renal Lenburg	8	hsa-mir-660	3.62738e-05	-
SMCL Lung Bhattacharjee	1	hsa-mir-1237	0.00015325	-
SMCL Lung Bhattacharjee	2	hsa-mir-1266	0.000383019	-
SMCL Lung Bhattacharjee	9	hsa-mir-362-3p hsa-mir-329	0.000160237	-
SMCL Lung Bhattacharjee	10	hsa-mir-720	0.000354772	-
SMCL Lung Bhattacharjee	15	hsa-mir-216b	0.000194459	-
SMCL Lung Bhattacharjee	16	hsa-mir-1274a	0.000233435	-
SMCL Lung Bhattacharjee	17	hsa-mir-888	0.000289329	-
SMCL Lung Bhattacharjee	18	hsa-mir-624	6.67374e-06	-
SMCL Lung Bhattacharjee	21	hsa-mir-570	0.000277837	-
SMCL Lung Bhattacharjee	22	hsa-mir-548n	0.000215678	-
SMCL Lung Bhattacharjee	25	hsa-mir-101	0.000395032	lung cancer|lung cancer
SMCL Lung Bhattacharjee	29	hsa-mir-513a-3p	9.99978e-06	-
SMCL Lung Bhattacharjee	30	hsa-mir-548n	4.80364e-06	-
SMCL Lung Bhattacharjee	34	hsa-mir-1207	3.87976e-05	-
SMCL Lung Bhattacharjee	41	hsa-mir-512-3p	0.000567461	-
SMCL Lung Bhattacharjee	45	hsa-mir-432	0.000596485	-
SMCL Lung Bhattacharjee	46	hsa-mir-499	8.38814e-05	-
SMCL Lung Bhattacharjee	52	hsa-mir-483-3p	3.55419e-05	-
SMCL Lung Bhattacharjee	55	hsa-mir-590-3p	0.000205653	-
SMCL Lung Bhattacharjee	56	hsa-mir-888	0.00034326	-
SQ Lung Bhattacharjee	4	hsa-mir-423	0.000143527	lung cancer
SQ Lung Bhattacharjee	15	hsa-mir-96	4.75367e-05	non-small cell lung cancer (NSCLC)
SQ Lung Bhattacharjee	16	hsa-mir-802	0.000178602	-
SQ Lung Bhattacharjee	18	hsa-mir-767	2.16895e-06	-
SQ Lung Bhattacharjee	19	hsa-mir-423	3.84123e-05	lung cancer
SQ Lung Bhattacharjee	22	hsa-mir-548n	0.000156966	-
SQ Lung Bhattacharjee	28	hsa-mir-616	0.000166731	-
SQ Lung Bhattacharjee	32	hsa-mir-532-3p	0.000103573	-
SQ Lung Bhattacharjee	33	hsa-mir-339	3.3586e-06	lung cancer
SQ Lung Bhattacharjee	37	hsa-mir-770	0.000210707	-
SQ Lung Bhattacharjee	41	hsa-mir-885-3p	5.21463e-05	-
SQ Lung Bhattacharjee	42	hsa-mir-637	8.30498e-06	-
SQ Lung Bhattacharjee	43	hsa-mir-597	4.56152e-05	-
SQ Lung Bhattacharjee	44	hsa-mir-767	0.000168025	-
SQ Lung Bhattacharjee	46	hsa-mir-650	0.0001481	-
SQ Lung Bhattacharjee	52	hsa-mir-411	0.000356853	-
SRS Ovarian Hendrix	1	hsa-mir-641	5.25754e-05	-
SRS Ovarian Hendrix	2	hsa-mir-505	8.02498e-06	-
SRS Ovarian Hendrix	11	hsa-mir-361	1.60601e-05	ovarian cancer (OC)
SRS Ovarian Hendrix	15	hsa-mir-1293	1.58298e-05	-
SRS Ovarian Hendrix	22	hsa-mir-624	0.000609064	-
SRS Ovarian Hendrix	27	hsa-mir-362	3.10492e-05	-
SRS Ovarian Hendrix	30	hsa-mir-424	5.58807e-07	ovarian cancer (OC)
SRS Ovarian Hendrix	41	hsa-mir-650	7.92938e-06	-
SRS Ovarian Hendrix	45	hsa-mir-146b-3p	0.000287347	-
SRS Ovarian Hendrix	52	hsa-mir-626	0.000199193	-
SRS Ovarian Hendrix	53	hsa-mir-376b hsa-mir-376a	9.7224e-08	epithelial ovarian cancer (EOC)
SRS Ovarian Hendrix	54	hsa-mir-448	0.00035465	-
SRS Ovarian Hendrix	55	hsa-mir-548l	4.93146e-05	-
SRS Ovarian Hendrix	57	hsa-mir-561	5.83189e-05	-
SRS Ovarian Hendrix	60	hsa-mir-188-3p	0.000485917	-
SRS Ovarian Hendrix	66	hsa-mir-892b	6.69382e-06	-
SRS Ovarian Hendrix	69	hsa-mir-330-3p	9.80191e-09	-
SRS Ovarian Hendrix	70	hsa-mir-641	3.13662e-07	-
SRS Ovarian Hendrix	72	hsa-mir-1276	2.59025e-10	-
SRS Ovarian Hendrix	73	hsa-mir-340	3.31833e-06	-
TU Prostate Lapointe	0	hsa-mir-874	5.58425e-05	-
TU Prostate Lapointe	1	hsa-mir-1297 hsa-mir-26a hsa-mir-26b	0.000505563	prostate cancer|prostate cancer
TU Prostate Lapointe	4	hsa-mir-532-3p	3.69504e-07	-
TU Prostate Lapointe	9	hsa-mir-208a hsa-mir-208b	1.34204e-05	-
TU Prostate Lapointe	17	hsa-mir-96	0.000125874	prostate cancer
TU Prostate Lapointe	18	hsa-mir-760	6.16935e-05	-
TU Prostate Lapointe	24	hsa-mir-496	3.92701e-06	-
TU Prostate Lapointe	31	hsa-mir-631	0.000651307	-
TU Prostate Lapointe	33	hsa-mir-802	9.41325e-05	-
TU Prostate Lapointe	35	hsa-mir-758	1.83722e-05	-
TU Prostate Lapointe	37	hsa-mir-199b-3p hsa-mir-199a-3p	0.000280073	cancer|prostate cancer
TU Prostate Lapointe	38	hsa-mir-1264	0.000492613	-
TU Prostate Lapointe	39	hsa-mir-590-3p	1.58222e-05	-
