# Supplementary material for: A miRNA-regulatory network explains how dysregulated miRNAs perturb oncogenic processes across diverse cancers
Source: HighWire-hosted journal article supplement (doi:10.1101/gr.133991.111), 2012-06-28
Supplement: SuppTab6.xlsx [file SuppTab6.xlsx]

## Sheet: Sheet1
Supplementary Table 6.
Dataset	Cluster	miRNA	Uncorrected P-value	miR2Disease
IDC Breast Radvanyi	9	hsa-mir-661	1.62381e-05	breast cancer
CA Breast Richardson	16	hsa-mir-18a	3.61756e-06	breast cancer
IDC Breast Radvanyi	28	hsa-mir-149	2.93801e-05	breast cancer
ILC Breast Radvanyi	20	hsa-mir-328	0.000540368	breast cancer
MCA Breast Radvanyi	18	hsa-mir-663	3.07218e-05	breast cancer|breast cancer
CA Breast Richardson	27	hsa-mir-663	2.75779e-06	breast cancer|breast cancer
MCA Breast Radvanyi	2	hsa-mir-204	0.000170357	breast cancer|breast cancer
CA Breast Richardson	68	hsa-mir-663	1.21078e-06	breast cancer|breast cancer
IDC Breast Radvanyi	15	hsa-mir-205	6.42883e-06	breast cancer|breast cancer|breast cancer
MCA Breast Radvanyi	19	hsa-mir-210	0.00017588	breast cancer|breast cancer|breast cancer
B-CLL Leukemia Haslinger	44	hsa-mir-200b	0.000562281	cancer
OD Brain Bredel	12	hsa-mir-200a	1.77403e-05	cancer
MPM Mesothelioma Gordon	31	hsa-mir-127	0.000264768	cancer
MPC Prostate Dhanasekaran	0	hsa-mir-200b	4.80054e-05	cancer
B-CLL Leukemia Haslinger	55	hsa-mir-200b	3.74529e-07	cancer
CA Renal Higgins	3	hsa-mir-199a-3p	0.000230566	cancer
AD Ovarian Welsh	0	hsa-mir-200b	1.6464e-06	cancer|epithelial ovarian cancer (EOC)|ovarian cancer (OC)|ovarian cancer (OC)
MUC Ovarian Hendrix	49	hsa-mir-200b	3.93321e-06	cancer|epithelial ovarian cancer (EOC)|ovarian cancer (OC)|ovarian cancer (OC)
SRS Ovarian Hendrix	68	hsa-mir-200b	4.92493e-06	cancer|epithelial ovarian cancer (EOC)|ovarian cancer (OC)|ovarian cancer (OC)|serous ovarian cancer
ME Melanoma Hoek	35	hsa-mir-200b	1.13269e-06	cancer|malignant melanoma
B-CLL Leukemia Haslinger	69	hsa-mir-146a	0.000450962	chronic lymphocytic leukemia (CLL)
CLL Lymphoma Alizadeh	4	hsa-mir-29b	0.000197019	chronic lymphocytic leukemia (CLL)|chronic lymphocytic leukemia (CLL)|chronic lymphocytic leukemia (CLL)
CA Colon Graudens	32	hsa-mir-296	1.17864e-06	colorectal cancer
CA Colon Graudens	2	hsa-mir-451	1.15577e-05	colorectal cancer
CA Colon Graudens	37	hsa-mir-32	0.000107611	colorectal cancer
CA Colon Graudens	15	hsa-mir-140	0.00034922	colorectal cancer
CA Colon Graudens	38	hsa-mir-96	1.78894e-05	colorectal cancer|colorectal cancer
SRS Ovarian Hendrix	60	hsa-mir-184	0.000490759	epithelial ovarian cancer (EOC)
SRS Ovarian Hendrix	64	hsa-mir-377	0.000266561	epithelial ovarian cancer (EOC)
END Ovarian Hendrix	66	hsa-mir-101	4.39823e-06	epithelial ovarian cancer (EOC)
CCC Ovarian Hendrix	20	hsa-mir-495	2.23146e-05	epithelial ovarian cancer (EOC)
END Ovarian Hendrix	28	hsa-mir-495	1.96825e-05	epithelial ovarian cancer (EOC)
CCC Ovarian Hendrix	61	hsa-mir-145	0.000153611	epithelial ovarian cancer (EOC)|epithelial ovarian cancer (EOC)
END Ovarian Hendrix	49	hsa-mir-145	0.000588653	epithelial ovarian cancer (EOC)|epithelial ovarian cancer (EOC)
SRS Ovarian Hendrix	15	hsa-let-7d	0.000397689	epithelial ovarian cancer (EOC)|epithelial ovarian cancer (EOC)|ovarian cancer (OC)
END Ovarian Hendrix	37	hsa-mir-125b	0.000475101	epithelial ovarian cancer (EOC)|ovarian cancer (OC)
END Ovarian Hendrix	78	hsa-mir-125a	0.000362188	epithelial ovarian cancer (EOC)|ovarian cancer (OC)
FL Lymphoma Alizadeh	2	hsa-mir-149	2.15598e-05	follicular lymphoma (FL)
GBM Brain Liang	7	hsa-mir-323	5.84876e-05	glioblastoma multiforme (GBM)
GL Brain Bredel	60	hsa-mir-25	9.54122e-05	glioblastoma|glioma
ODGL Brain Sun	57	hsa-mir-296	9.53481e-06	glioma
GL Brain Bredel	32	hsa-mir-15a	0.000311239	glioma
OD Brain Bredel	14	hsa-mir-296	7.11731e-06	glioma
AO Brain Bredel	1	hsa-mir-181a	0.000168423	glioma
AO Brain Bredel	28	hsa-mir-296	7.74881e-06	glioma
AC Brain Sun	12	hsa-mir-210	6.53843e-05	glioma
HSCC Head-Neck Cromer	22	hsa-mir-30b	3.14098e-05	head and neck squamous cell carcinoma (HNSCC)
RCCC Renal Lenburg	0	hsa-mir-489	2.01689e-05	kidney cancer
RCCC Renal Boer	7	hsa-mir-106b	0.000251281	kidney cancer
SMCL Lung Bhattacharjee	58	hsa-mir-423	0.000179756	lung cancer
AD Lung Beer	18	hsa-mir-19a	5.8458e-07	lung cancer
AD Lung Bhattacharjee	0	hsa-mir-338	1.11711e-06	lung cancer
SMCL Lung Bhattacharjee	20	hsa-mir-423	7.0868e-06	lung cancer
AD Lung Stearman	29	hsa-mir-425	3.75836e-05	lung cancer
SQ Lung Bhattacharjee	4	hsa-mir-214	7.87924e-05	lung cancer
COID Lung Bhattacharjee	78	hsa-mir-27b	0.000262632	lung cancer
AD Lung Bhattacharjee	27	hsa-mir-451	0.000277652	lung cancer
COID Lung Bhattacharjee	30	hsa-mir-423	0.000201932	lung cancer
COID Lung Bhattacharjee	40	hsa-mir-93	0.000170538	lung cancer
SMCL Lung Bhattacharjee	35	hsa-mir-212	0.000352999	lung cancer
SMCL Lung Bhattacharjee	45	hsa-mir-125a	0.000506289	lung cancer|lung cancer
SQ Lung Bhattacharjee	32	hsa-mir-210	0.000299713	lung cancer|lung cancer
AD Lung Beer	31	hsa-mir-29b	1.59476e-06	lung cancer|lung cancer
COID Lung Bhattacharjee	10	hsa-mir-101	7.34298e-07	lung cancer|lung cancer
SMCL Lung Bhattacharjee	53	hsa-mir-20a	2.41685e-05	lung cancer|lung cancer|lung cancer
AD Lung Bhattacharjee	52	hsa-let-7a	0.000427939	lung cancer|lung cancer|lung cancer|lung cancer|lung cancer|lung cancer|non-small cell lung cancer (NSCLC)|non-small cell lung cancer (NSCLC)
AD Lung Beer	0	hsa-let-7d	8.4858e-05	lung cancer|non-small cell lung cancer (NSCLC)
AD Lung Stearman	7	hsa-mir-16	6.72243e-05	lung cancer|non-small cell lung cancer (NSCLC)
ME Melanoma Hoek	20	hsa-mir-331	0.000508692	malignant melanoma
ML Melanoma Talantov	8	hsa-mir-199b	3.4754e-05	malignant melanoma
ML Melanoma Talantov	27	hsa-mir-96	0.000474947	malignant melanoma
MPM Mesothelioma Gordon	59	hsa-mir-423	7.32987e-06	Malignant mesothelioma (MM)
MPM Mesothelioma Gordon	19	hsa-mir-423	0.000166269	Malignant mesothelioma (MM)
SQ Lung Bhattacharjee	49	hsa-mir-34a	0.000184016	non-small cell lung cancer (NSCLC)
SRS Ovarian Hendrix	24	hsa-mir-635	0.000119101	ovarian cancer (OC)
MUC Ovarian Hendrix	28	hsa-mir-296	8.32543e-06	ovarian cancer (OC)
AD Ovarian Welsh	25	hsa-mir-572	0.000107609	ovarian cancer (OC)
MUC Ovarian Hendrix	30	hsa-mir-635	0.000153945	ovarian cancer (OC)
SRS Ovarian Hendrix	83	hsa-mir-637	1.65499e-06	ovarian cancer (OC)
SRS Ovarian Hendrix	20	hsa-mir-296	0.000493587	ovarian cancer (OC)
SRS Ovarian Hendrix	67	hsa-mir-608	6.23357e-07	ovarian cancer (OC)
MUC Ovarian Hendrix	26	hsa-mir-296	6.08876e-05	ovarian cancer (OC)
MUC Ovarian Hendrix	48	hsa-mir-608	8.31805e-05	ovarian cancer (OC)
SRS Ovarian Hendrix	78	hsa-mir-206	0.000254763	ovarian cancer (OC)
END Ovarian Hendrix	15	hsa-mir-542-3p	3.11424e-05	ovarian cancer (OC)
END Ovarian Hendrix	17	hsa-mir-30e	0.000158264	ovarian cancer (OC)
AD Ovarian Welsh	4	hsa-mir-424	9.75726e-06	ovarian cancer (OC)
TU Prostate Lapointe	10	hsa-mir-32	9.82026e-06	prostate cancer
PPC Prostate Dhanasekaran	34	hsa-mir-149	0.000124363	prostate cancer
TU Prostate Lapointe	13	hsa-mir-497	0.000100169	prostate cancer
TU Prostate Lapointe	23	hsa-mir-25	0.000249909	prostate cancer
TU Prostate Lapointe	19	hsa-mir-296	6.89026e-07	prostate cancer
MPC Prostate Dhanasekaran	11	hsa-mir-34a	0.000291101	prostate cancer
MPC Prostate Dhanasekaran	7	hsa-mir-296	4.29029e-06	prostate cancer
PPC Prostate Dhanasekaran	17	hsa-mir-34a	0.000201155	prostate cancer
PPC Prostate Dhanasekaran	32	hsa-mir-296	1.77415e-06	prostate cancer
MPC Prostate Dhanasekaran	16	hsa-mir-101	2.52572e-06	prostate cancer|prostate cancer|prostate cancer
RCCC Renal Boer	0	hsa-mir-494	4.34321e-06	renal clear cell carcinoma
GCT Seminoma Korkola	87	hsa-mir-371	8.90189e-07	testicular germ cell tumor
GCT Seminoma Korkola	101	hsa-mir-372	3.92138e-07	testicular germ cell tumor|testicular germ cell tumor
MUC Ovarian Hendrix	21	hsa-mir-520d	3.09545e-05	-
MUC Ovarian Hendrix	19	hsa-mir-548g	1.81237e-05	-
AD Lung Bhattacharjee	55	hsa-mir-1286	5.30904e-05	-
GL Brain Bredel	22	hsa-mir-657	0.000105499	-
GLB Brain Sun	36	hsa-mir-423	2.03317e-07	-
COID Lung Bhattacharjee	58	hsa-mir-23a	0.000106957	-
AD Ovarian Welsh	1	hsa-mir-548d-3p	6.47857e-07	-
CA Colon Graudens	24	hsa-mir-522	1.62109e-06	-
SMCL Lung Bhattacharjee	18	hsa-mir-513	4.74237e-05	-
ME Melanoma Hoek	26	hsa-mir-577	0.00015717	-
B-CLL Leukemia Haslinger	38	hsa-mir-548g	8.12549e-05	-
SMCL Lung Bhattacharjee	6	hsa-mir-1201	0.000464237	-
AD Lung Beer	38	hsa-mir-933	2.88088e-05	-
BPH Prostate Dhanasekaran	18	hsa-mir-513a-3p	1.76143e-05	-
GCT Seminoma Korkola	89	hsa-mir-1257	5.15269e-06	-
MPM Mesothelioma Gordon	64	hsa-mir-655	6.39396e-06	-
GCT Seminoma Korkola	28	hsa-mir-146a	0.000148787	-
HSCC Head-Neck Chung	9	hsa-mir-708	0.000132985	-
GLB Brain Sun	72	hsa-mir-1294	6.35533e-05	-
B-CLL Leukemia Haslinger	36	hsa-mir-587	0.000191245	-
CA Breast Sorlie	20	hsa-mir-590-3p	3.23996e-07	-
GCT Seminoma Korkola	112	hsa-mir-548n	7.78656e-15	-
AD Lung Stearman	13	hsa-mir-23a	5.52941e-05	-
COID Lung Bhattacharjee	51	hsa-mir-656	3.15621e-09	-
CA Breast Richardson	28	hsa-mir-765	0.000106308	-
AD Lung Bhattacharjee	30	hsa-mir-548c-3p	9.03281e-14	-
ILC Breast Radvanyi	2	hsa-mir-423-3p	0.000203181	-
MPM Mesothelioma Gordon	29	hsa-mir-1265	0.000313362	-
ML Melanoma Talantov	26	hsa-mir-664	2.21477e-05	-
CA Bladder Dyrskjot	39	hsa-mir-486-3p	0.000214753	-
GLB Brain Sun	18	hsa-mir-498	6.0295e-09	-
PPC Prostate Dhanasekaran	29	hsa-mir-509-3p	0.000145973	-
CA Breast Richardson	33	hsa-mir-1251	0.000477315	-
CA Breast Richardson	3	hsa-mir-578	8.25829e-06	-
GCT Seminoma Korkola	37	hsa-mir-519a	1.33253e-09	-
GL Brain Rickman	22	hsa-mir-374b	4.00607e-07	-
CA Bladder Dyrskjot	1	hsa-mir-637	6.92355e-11	-
SRS Ovarian Hendrix	16	hsa-mir-548k	1.81655e-06	-
AD Lung Bhattacharjee	81	hsa-mir-516b	1.25886e-05	-
FL Lymphoma Alizadeh	0	hsa-mir-92a	1.01048e-07	-
MPC Prostate Dhanasekaran	29	hsa-mir-663	6.65468e-05	-
AD Lung Beer	43	hsa-mir-1275	0.000105766	-
CA Bladder Dyrskjot	3	hsa-mir-1308	8.73428e-07	-
SRS Ovarian Hendrix	10	hsa-mir-34c-3p	4.68593e-07	-
MPC Prostate Dhanasekaran	26	hsa-mir-548j	0.000385787	-
CCC Ovarian Hendrix	44	hsa-mir-548m	1.06666e-05	-
CA Bladder Dyrskjot	53	hsa-mir-944	1.08044e-06	-
GCT Seminoma Korkola	31	hsa-mir-891a	0.000233697	-
COID Lung Bhattacharjee	25	hsa-mir-361	6.17128e-05	-
MM Myeloma Zhan	50	hsa-mir-28	7.85752e-05	-
AD Ovarian Welsh	10	hsa-mir-921	6.00727e-06	-
SMCL Lung Bhattacharjee	46	hsa-mir-891b	0.000383258	-
RCCC Renal Boer	1	hsa-mir-371	0.000530325	-
PPC Prostate Dhanasekaran	1	hsa-mir-561	1.34305e-05	-
GCT Seminoma Korkola	80	hsa-mir-573	3.65011e-06	-
CCC Ovarian Hendrix	14	hsa-mir-1276	1.05518e-05	-
GL Brain Bredel	17	hsa-mir-877	0.000266194	-
END Ovarian Hendrix	32	hsa-mir-548d-3p	6.61224e-11	-
COID Lung Bhattacharjee	48	hsa-mir-886	0.00018962	-
CA Bladder Dyrskjot	23	hsa-mir-211	8.07201e-07	-
MPM Mesothelioma Gordon	56	hsa-mir-590-3p	9.29466e-06	-
BPH Prostate Dhanasekaran	7	hsa-mir-380	4.13805e-06	-
SRS Ovarian Hendrix	75	hsa-mir-372	1.9658e-08	-
COID Lung Bhattacharjee	5	hsa-mir-548o	2.40969e-05	-
GL Brain Bredel	78	hsa-mir-424	0.000301626	-
BPH Prostate Dhanasekaran	9	hsa-mir-574	0.000269626	-
FL Lymphoma Alizadeh	11	hsa-mir-614	0.000529183	-
GCT Seminoma Korkola	63	hsa-mir-889	3.03776e-06	-
END Ovarian Hendrix	77	hsa-mir-590-3p	4.95213e-09	-
DLBCL Lymphoma Alizadeh	3	hsa-mir-744	1.82129e-05	-
MPM Mesothelioma Gordon	52	hsa-mir-606	8.62761e-08	-
SQ Lung Bhattacharjee	30	hsa-mir-1233	0.000445813	-
CA Bladder Dyrskjot	25	hsa-mir-1204	2.5201e-05	-
GCT Seminoma Korkola	73	hsa-mir-675	0.000190634	-
MUC Ovarian Hendrix	55	hsa-mir-486-3p	1.45779e-05	-
SMCL Lung Bhattacharjee	2	hsa-mir-940	1.22578e-05	-
GCT Seminoma Korkola	3	hsa-mir-296	2.40307e-07	-
CCC Ovarian Hendrix	37	hsa-mir-1237	0.000328049	-
AC Brain Sun	46	hsa-mir-590-3p	9.15787e-09	-
PPC Prostate Dhanasekaran	28	hsa-mir-944	3.15376e-12	-
HSCC Head-Neck Cromer	20	hsa-mir-567	4.15999e-07	-
MUC Ovarian Hendrix	23	hsa-mir-486-3p	2.97245e-07	-
GLB Brain Sun	73	hsa-mir-187	4.99672e-06	-
ME Melanoma Hoek	16	hsa-mir-631	0.000590804	-
COID Lung Bhattacharjee	64	hsa-mir-661	6.53615e-07	-
COID Lung Bhattacharjee	75	hsa-mir-874	7.96877e-05	-
CA Breast Richardson	58	hsa-mir-889	6.57962e-05	-
CA Breast Richardson	53	hsa-mir-486	3.45705e-05	-
GCT Seminoma Korkola	85	hsa-mir-181	0.000115903	-
ODGL Brain Sun	11	hsa-mir-219-1-3p	0.000228608	-
CA Breast Richardson	65	hsa-mir-1254	4.75248e-05	-
AD Ovarian Welsh	21	hsa-mir-606	8.70861e-05	-
MPC Prostate Dhanasekaran	48	hsa-mir-625	0.000326443	-
SMCL Lung Bhattacharjee	11	hsa-mir-1321	0.000308592	-
HSCC Head-Neck Chung	10	hsa-mir-607	3.02198e-05	-
GBM Brain Liang	13	hsa-mir-1278	0.000208092	-
GL Brain Rickman	23	hsa-mir-935	9.25624e-06	-
AC Brain Sun	28	hsa-mir-539	4.3248e-05	-
GLB Brain Sun	1	hsa-mir-324	3.15758e-05	-
DLBCL Lymphoma Alizadeh	7	hsa-mir-1301	0.00017345	-
SRS Ovarian Hendrix	21	hsa-mir-944	4.94595e-07	-
ODGL Brain Sun	63	hsa-mir-410	0.000134983	-
AD Lung Beer	15	hsa-mir-586	0.000587308	-
MUC Ovarian Hendrix	72	hsa-mir-409	0.00020328	-
CA Breast Richardson	51	hsa-mir-633	1.07528e-05	-
GCT Seminoma Korkola	83	hsa-mir-1254	0.000197016	-
CCC Ovarian Hendrix	43	hsa-mir-1247	2.38475e-07	-
B-CLL Leukemia Haslinger	31	hsa-mir-1321	0.000537156	-
MM Myeloma Zhan	39	hsa-mir-647	0.000511455	-
CA Breast Richardson	25	hsa-mir-1252	0.000611632	-
BPH Prostate Dhanasekaran	20	hsa-mir-1224-3p	9.25744e-06	-
GCT Seminoma Korkola	72	hsa-mir-760	4.01871e-05	-
SRS Ovarian Hendrix	55	hsa-mir-338	1.39531e-06	-
IDC Breast Radvanyi	7	hsa-mir-450b-3p	0.000288602	-
MUC Ovarian Hendrix	34	hsa-mir-1291	0.000213025	-
MUC Ovarian Hendrix	56	hsa-mir-548c-3p	2.01623e-10	-
OD Brain Bredel	57	hsa-mir-423	2.25394e-06	-
TU Prostate Lapointe	0	hsa-mir-219-2-3p	7.91775e-05	-
SMCL Lung Bhattacharjee	28	hsa-mir-744	9.03937e-05	-
TU Prostate Lapointe	17	hsa-mir-219	0.000106525	-
END Ovarian Hendrix	20	hsa-mir-663b	9.76886e-05	-
GCT Seminoma Korkola	96	hsa-mir-29a	8.0018e-05	-
B-CLL Leukemia Haslinger	53	hsa-mir-513a-3p	1.98634e-05	-
CCC Ovarian Hendrix	7	hsa-mir-382	0.000180446	-
CA Bladder Dyrskjot	9	hsa-mir-548c-3p	1.49908e-14	-
CA Bladder Dyrskjot	65	hsa-mir-888	1.93551e-05	-
END Ovarian Hendrix	76	hsa-mir-888	8.59692e-06	-
GLB Brain Sun	54	hsa-mir-921	2.43742e-08	-
GCT Seminoma Korkola	40	hsa-mir-548n	0.000170776	-
GLB Brain Sun	0	hsa-mir-637	3.56792e-05	-
RCCC Renal Boer	13	hsa-mir-1279	1.39204e-06	-
MUC Ovarian Hendrix	76	hsa-mir-573	7.3136e-08	-
AD Lung Bhattacharjee	22	hsa-mir-619	0.000399164	-
END Ovarian Hendrix	9	hsa-mir-486-3p	2.89155e-06	-
AD Lung Bhattacharjee	75	hsa-mir-637	2.82804e-06	-
ME Melanoma Hoek	0	hsa-mir-582	4.80058e-05	-
MUC Ovarian Hendrix	73	hsa-mir-361-3p	4.65542e-10	-
CA Breast Richardson	61	hsa-mir-1271	0.000378242	-
AC Brain Sun	17	hsa-mir-617	0.000105979	-
TU Prostate Lapointe	34	hsa-mir-886	0.000346316	-
MUC Ovarian Hendrix	13	hsa-mir-1280	0.000351255	-
DLBCL Lymphoma Alizadeh	2	hsa-mir-660	0.000277854	-
GLB Brain Sun	31	hsa-mir-501-3p	0.000148691	-
MUC Ovarian Hendrix	15	hsa-mir-944	7.47708e-12	-
GCT Seminoma Korkola	102	hsa-mir-34a	9.23659e-05	-
HSCC Head-Neck Cromer	10	hsa-mir-520a	0.000571699	-
ODGL Brain Sun	0	hsa-mir-637	0.000354231	-
MPM Mesothelioma Gordon	27	hsa-mir-128	0.000309287	-
GL Brain Bredel	57	hsa-mir-193a-3p	0.000180522	-
CA Bladder Dyrskjot	42	hsa-mir-362	9.61143e-05	-
MPC Prostate Dhanasekaran	22	hsa-mir-382	5.46227e-06	-
ILC Breast Radvanyi	4	hsa-mir-548a-3p	0.000525313	-
CA Bladder Dyrskjot	13	hsa-mir-548c-3p	6.27508e-07	-
AD Lung Bhattacharjee	35	hsa-mir-133a	1.56802e-05	-
MUC Ovarian Hendrix	27	hsa-mir-423	0.000146228	-
MUC Ovarian Hendrix	18	hsa-mir-606	5.19259e-05	-
GCT Seminoma Korkola	25	hsa-mir-607	1.21168e-08	-
MPM Mesothelioma Gordon	51	hsa-mir-376a	0.000159942	-
GLB Brain Sun	20	hsa-mir-331	3.34628e-05	-
AD Lung Bhattacharjee	44	hsa-mir-1284	6.44781e-06	-
GCT Seminoma Korkola	21	hsa-mir-520f	2.03863e-08	-
SRS Ovarian Hendrix	66	hsa-mir-548c-3p	8.80427e-09	-
CA Breast Richardson	59	hsa-mir-608	1.67049e-05	-
AD Lung Bhattacharjee	10	hsa-mir-1321	6.35169e-06	-
DLBCL Lymphoma Alizadeh	6	hsa-mir-483-3p	0.000603015	-
END Ovarian Hendrix	38	hsa-mir-944	3.49032e-09	-
CCC Ovarian Hendrix	51	hsa-mir-499-3p	0.000444328	-
MPC Prostate Dhanasekaran	17	hsa-mir-1266	3.01831e-06	-
END Ovarian Hendrix	34	hsa-mir-1826	3.02793e-05	-
RCCC Renal Lenburg	8	hsa-mir-889	6.30719e-06	-
END Ovarian Hendrix	11	hsa-mir-940	9.78707e-05	-
GL Brain Bredel	72	hsa-mir-760	0.000219694	-
AD Lung Bhattacharjee	17	hsa-mir-491	4.14055e-05	-
COID Lung Bhattacharjee	52	hsa-mir-154	0.000584551	-
GCT Seminoma Korkola	75	hsa-mir-708	3.59769e-05	-
ML Melanoma Talantov	23	hsa-mir-1259	2.72508e-07	-
ME Melanoma Hoek	9	hsa-mir-494	4.40008e-05	-
ML Melanoma Talantov	14	hsa-mir-548c-3p	4.53227e-14	-
AD Lung Stearman	36	hsa-mir-1269	1.33558e-05	-
ILC Breast Radvanyi	24	hsa-mir-340	0.000381565	-
ODGL Brain Sun	47	hsa-mir-1204	1.23434e-05	-
CCC Ovarian Hendrix	9	hsa-mir-1291	5.78833e-05	-
B-CLL Leukemia Haslinger	68	hsa-mir-520g	0.000419054	-
GLB Brain Sun	68	hsa-mir-299	0.000302475	-
BPH Prostate Dhanasekaran	13	hsa-mir-922	3.12023e-05	-
OD Brain Bredel	3	hsa-mir-195	0.00018012	-
MUC Ovarian Hendrix	3	hsa-mir-1205	0.000111582	-
SQ Lung Bhattacharjee	15	hsa-mir-569	3.54588e-07	-
AD Lung Beer	6	hsa-mir-548c-3p	1.66492e-05	-
CA Renal Higgins	17	hsa-mir-663	3.56851e-07	-
CCC Ovarian Hendrix	10	hsa-mir-615	2.06217e-05	-
SRS Ovarian Hendrix	30	hsa-mir-582	2.24182e-07	-
CA Renal Higgins	13	hsa-mir-663	4.59154e-05	-
CA Breast Richardson	50	hsa-mir-380	1.41979e-05	-
CA Bladder Dyrskjot	71	hsa-mir-662	0.000356281	-
SMCL Lung Bhattacharjee	5	hsa-mir-1321	0.000105392	-
SRS Ovarian Hendrix	17	hsa-mir-193b	0.000508028	-
RCCC Renal Boer	9	hsa-mir-502-3p	0.000234434	-
SQ Lung Bhattacharjee	19	hsa-mir-647	9.64765e-06	-
END Ovarian Hendrix	31	hsa-mir-1253	0.000484638	-
MPM Mesothelioma Gordon	36	hsa-mir-487a	3.07569e-06	-
CA Breast Richardson	15	hsa-mir-494	1.40498e-06	-
MM Myeloma Zhan	4	hsa-mir-185	6.20496e-06	-
CA Colon Graudens	40	hsa-mir-369-3p	4.95691e-06	-
CA Breast Richardson	18	hsa-mir-135a	3.31868e-06	-
ILC Breast Radvanyi	10	hsa-mir-548c-3p	0.000529657	-
MUC Ovarian Hendrix	8	hsa-mir-486-3p	2.2904e-05	-
GL Brain Rickman	32	hsa-mir-889	0.000162082	-
AD Lung Bhattacharjee	34	hsa-mir-296	1.1331e-05	-
GCT Seminoma Korkola	52	hsa-mir-508	1.78709e-05	-
GLB Brain Sun	3	hsa-mir-320a	0.000334921	-
CA Breast Richardson	46	hsa-mir-607	8.39101e-07	-
MPM Mesothelioma Gordon	15	hsa-mir-1229	0.000201101	-
CA Colon Graudens	31	hsa-mir-548o	4.28386e-06	-
PPC Prostate Dhanasekaran	2	hsa-mir-641	0.000166542	-
END Ovarian Hendrix	65	hsa-mir-331-3p	0.000108718	-
SRS Ovarian Hendrix	59	hsa-mir-656	0.000449134	-
MM Myeloma Zhan	34	hsa-mir-147b	0.000550706	-
CA Bladder Dyrskjot	22	hsa-mir-663	9.2551e-07	-
CCC Ovarian Hendrix	13	hsa-mir-500	0.000239274	-
ME Melanoma Hoek	15	hsa-mir-1292	0.000135688	-
CA Bladder Dyrskjot	10	hsa-mir-597	7.62364e-05	-
AC Brain Sun	31	hsa-mir-1280	5.32376e-05	-
GCT Seminoma Korkola	16	hsa-mir-1183	4.56786e-05	-
SMCL Lung Bhattacharjee	47	hsa-mir-302e	0.000548428	-
GL Brain Bredel	47	hsa-mir-1236	0.000346281	-
GCT Seminoma Korkola	32	hsa-mir-608	0.000145012	-
CCC Ovarian Hendrix	0	hsa-mir-194	6.00135e-06	-
MUC Ovarian Hendrix	65	hsa-mir-380	2.64678e-05	-
GLB Brain Sun	59	hsa-mir-1252	3.13351e-05	-
AC Brain Sun	18	hsa-mir-1305	0.000570172	-
GCT Seminoma Korkola	69	hsa-mir-296	0.000405059	-
END Ovarian Hendrix	43	hsa-mir-590-3p	1.15929e-05	-
MM Myeloma Zhan	26	hsa-mir-1321	5.0106e-06	-
MPM Mesothelioma Gordon	2	hsa-mir-1207	0.000107599	-
HSCC Head-Neck Chung	4	hsa-mir-548l	5.27751e-05	-
CA Bladder Dyrskjot	36	hsa-mir-548c-3p	5.68825e-13	-
AD Lung Bhattacharjee	19	hsa-mir-1247	0.000325418	-
CA Bladder Dyrskjot	16	hsa-mir-939	9.40327e-07	-
SRS Ovarian Hendrix	11	hsa-mir-590-3p	0.000114458	-
MUC Ovarian Hendrix	66	hsa-mir-889	0.000101883	-
AD Lung Stearman	6	hsa-mir-380	9.2066e-05	-
BPH Prostate Dhanasekaran	4	hsa-mir-1278	0.000153908	-
CA Breast Richardson	29	hsa-mir-1302	5.50658e-05	-
AD Ovarian Welsh	11	hsa-mir-1225	0.000597055	-
COID Lung Bhattacharjee	20	hsa-mir-615-3p	0.000534605	-
MPM Mesothelioma Gordon	54	hsa-mir-548h	0.000153669	-
GCT Seminoma Korkola	34	hsa-mir-136	9.69081e-10	-
CA Colon Graudens	5	hsa-mir-548h	0.000122758	-
CA Breast Richardson	45	hsa-mir-513a-3p	7.33811e-10	-
TU Prostate Lapointe	11	hsa-mir-152	1.30113e-05	-
OD Brain Bredel	47	hsa-mir-219-1-3p	0.000375423	-
SMCL Lung Bhattacharjee	50	hsa-mir-664	5.89275e-14	-
MPM Mesothelioma Gordon	33	hsa-mir-768	0.000220019	-
MPC Prostate Dhanasekaran	8	hsa-mir-219-1-3p	0.000270967	-
CCC Ovarian Hendrix	33	hsa-mir-770	0.000104352	-
GLB Brain Sun	49	hsa-mir-340	5.59719e-05	-
END Ovarian Hendrix	48	hsa-mir-1304	1.79621e-05	-
CA Bladder Dyrskjot	72	hsa-mir-296	9.99805e-11	-
AD Lung Beer	42	hsa-mir-651	0.000137443	-
MM Myeloma Zhan	15	hsa-mir-922	2.65926e-05	-
SRS Ovarian Hendrix	26	hsa-mir-325	9.20328e-05	-
CA Colon Graudens	14	hsa-mir-886	0.00042904	-
MPC Prostate Dhanasekaran	36	hsa-mir-942	4.85755e-05	-
GL Brain Bredel	66	hsa-mir-27a	0.000131506	-
ILC Breast Radvanyi	26	hsa-mir-486-3p	1.82471e-06	-
SRS Ovarian Hendrix	35	hsa-mir-220a	6.68535e-06	-
PPC Prostate Dhanasekaran	27	hsa-mir-1279	2.59236e-05	-
COID Lung Bhattacharjee	11	hsa-mir-513b	1.55661e-05	-
MUC Ovarian Hendrix	50	hsa-mir-889	4.39304e-06	-
ME Melanoma Hoek	12	hsa-mir-935	8.39843e-06	-
SQ Lung Bhattacharjee	24	hsa-mir-889	9.54929e-06	-
ODGL Brain Sun	20	hsa-mir-548e	2.16292e-06	-
ODGL Brain Sun	25	hsa-mir-548l	3.21013e-08	-
ODGL Brain Sun	2	hsa-mir-939	1.10489e-11	-
COID Lung Bhattacharjee	69	hsa-mir-765	0.000160635	-
END Ovarian Hendrix	3	hsa-mir-1279	0.000316131	-
END Ovarian Hendrix	61	hsa-mir-342	4.60194e-05	-
SQ Lung Bhattacharjee	45	hsa-mir-654	9.05532e-05	-
MPC Prostate Dhanasekaran	34	hsa-mir-1279	3.65445e-08	-
AD Lung Bhattacharjee	12	hsa-mir-590-3p	0.000565441	-
AD Pancreas Logsdon	18	hsa-mir-939	9.10639e-05	-
B-CLL Leukemia Haslinger	41	hsa-mir-483	0.000426084	-
ML Melanoma Talantov	36	hsa-mir-663	7.10128e-09	-
GCT Seminoma Korkola	106	hsa-mir-513b	0.000341133	-
SQ Lung Bhattacharjee	50	hsa-mir-607	6.96437e-05	-
GCT Seminoma Korkola	111	hsa-mir-296	0.000178861	-
SQ Lung Bhattacharjee	27	hsa-mir-940	8.77635e-05	-
MM Myeloma Zhan	47	hsa-mir-662	7.8696e-05	-
END Ovarian Hendrix	40	hsa-mir-944	8.91599e-07	-
IDC Breast Radvanyi	4	hsa-mir-608	0.000192757	-
SRS Ovarian Hendrix	6	hsa-mir-185	0.000528828	-
GL Brain Rickman	9	hsa-mir-1207	4.70662e-06	-
GL Brain Bredel	0	hsa-mir-548i	0.000241782	-
B-CLL Leukemia Haslinger	65	hsa-mir-1247	0.000436296	-
AD Lung Bhattacharjee	6	hsa-mir-602	0.000348747	-
SRS Ovarian Hendrix	32	hsa-mir-331-3p	1.36562e-05	-
END Ovarian Hendrix	72	hsa-mir-548d-3p	8.31143e-06	-
CA Bladder Dyrskjot	40	hsa-mir-548d-3p	0.000121089	-
ME Melanoma Hoek	39	hsa-mir-944	3.2972e-06	-
GCT Seminoma Korkola	39	hsa-mir-639	9.45576e-05	-
GCT Seminoma Korkola	98	hsa-mir-203	5.27528e-08	-
SRS Ovarian Hendrix	48	hsa-mir-1278	7.15802e-05	-
END Ovarian Hendrix	60	hsa-mir-570	2.61344e-09	-
GL Brain Rickman	15	hsa-mir-487a	0.000117352	-
AD Lung Beer	53	hsa-mir-548d-3p	1.04299e-06	-
MUC Ovarian Hendrix	63	hsa-mir-1247	6.75098e-05	-
COID Lung Bhattacharjee	23	hsa-mir-1228	0.000222914	-
SMCL Lung Bhattacharjee	61	hsa-mir-331-3p	3.7259e-06	-
MUC Ovarian Hendrix	0	hsa-mir-410	5.35574e-08	-
COID Lung Bhattacharjee	12	hsa-mir-494	8.52612e-06	-
ME Melanoma Hoek	41	hsa-mir-451	0.000175004	-
MUC Ovarian Hendrix	69	hsa-mir-579	5.85156e-05	-
MUC Ovarian Hendrix	60	hsa-mir-574-3p	3.68297e-05	-
END Ovarian Hendrix	50	hsa-mir-548c-3p	2.18107e-10	-
PPC Prostate Dhanasekaran	33	hsa-mir-548e	9.15707e-06	-
GLB Brain Sun	25	hsa-mir-600	6.05515e-06	-
MM Myeloma Zhan	11	hsa-mir-658	0.00033622	-
IDC Breast Radvanyi	41	hsa-mir-939	6.11652e-06	-
CA Breast Richardson	37	hsa-mir-1289	0.000579338	-
SRS Ovarian Hendrix	79	hsa-mir-944	5.08857e-05	-
AD Pancreas Logsdon	12	hsa-mir-933	0.00012855	-
SRS Ovarian Hendrix	9	hsa-mir-1297	0.00015033	-
RCCC Renal Lenburg	9	hsa-mir-1238	0.000381766	-
AC Brain Sun	37	hsa-mir-569	0.000257267	-
MPC Prostate Dhanasekaran	12	hsa-mir-340	5.22338e-11	-
IDC Breast Radvanyi	14	hsa-mir-323-3p	0.000103181	-
PPC Prostate Dhanasekaran	37	hsa-mir-553	0.000599727	-
CA Bladder Dyrskjot	15	hsa-mir-1323	2.35336e-07	-
END Ovarian Hendrix	82	hsa-mir-320b	1.52766e-05	-
HSCC Head-Neck Chung	7	hsa-mir-573	4.01801e-05	-
MM Myeloma Zhan	13	hsa-mir-770	3.52978e-05	-
B-CLL Leukemia Haslinger	35	hsa-mir-486-3p	5.55181e-09	-
CA Bladder Dyrskjot	54	hsa-mir-491	6.59494e-06	-
SRS Ovarian Hendrix	61	hsa-mir-1224-3p	0.000355435	-
AO Brain Bredel	22	hsa-mir-663	3.41212e-06	-
IDC Breast Radvanyi	56	hsa-mir-576	0.000441942	-
B-CLL Leukemia Haslinger	21	hsa-mir-548c-3p	1.9336e-14	-
MUC Ovarian Hendrix	7	hsa-mir-590-3p	1.45763e-10	-
B-CLL Leukemia Haslinger	52	hsa-mir-302a	0.000364911	-
GL Brain Rickman	34	hsa-mir-1274a	4.31395e-05	-
ML Melanoma Talantov	9	hsa-mir-493	0.000491063	-
MPC Prostate Dhanasekaran	40	hsa-mir-220	9.76912e-06	-
CA Breast Sorlie	23	hsa-mir-423	0.000106954	-
AD Lung Bhattacharjee	82	hsa-mir-647	0.000162289	-
AD Ovarian Welsh	9	hsa-mir-524	3.48232e-05	-
GL Brain Rickman	27	hsa-mir-182	7.80553e-05	-
CA Bladder Dyrskjot	80	hsa-mir-616	7.1228e-05	-
FL Lymphoma Alizadeh	5	hsa-mir-581	0.000111755	-
TU Prostate Lapointe	32	hsa-mir-608	6.55992e-07	-
SRS Ovarian Hendrix	73	hsa-mir-340	1.70715e-08	-
B-CLL Leukemia Haslinger	51	hsa-mir-448	0.000227269	-
CA Bladder Dyrskjot	24	hsa-mir-663	2.3333e-05	-
ODGL Brain Sun	7	hsa-mir-548k	0.000124326	-
ODGL Brain Sun	41	hsa-mir-26b	5.23797e-05	-
AD Lung Beer	28	hsa-mir-1245	0.000608297	-
CA Breast Sorlie	17	hsa-mir-640	0.000265634	-
SMCL Lung Bhattacharjee	7	hsa-mir-615	0.00025691	-
CA Bladder Dyrskjot	29	hsa-mir-548c-3p	1.78728e-06	-
CA Breast Richardson	2	hsa-mir-590-3p	8.86171e-05	-
PPC Prostate Dhanasekaran	20	hsa-mir-1207	0.000191478	-
SRS Ovarian Hendrix	57	hsa-mir-548d-3p	5.1121e-06	-
OD Brain Bredel	54	hsa-mir-1275	7.50548e-05	-
MUC Ovarian Hendrix	68	hsa-mir-1305	1.02561e-05	-
MPM Mesothelioma Gordon	32	hsa-mir-541	0.000130877	-
AD Lung Stearman	27	hsa-mir-300	4.99776e-06	-
RCCC Renal Boer	15	hsa-mir-300	0.000145597	-
MPC Prostate Dhanasekaran	2	hsa-mir-548c-3p	2.3548e-06	-
CA Bladder Dyrskjot	64	hsa-mir-590-3p	1.05981e-25	-
AC Brain Sun	3	hsa-mir-1205	2.84146e-05	-
CA Breast Richardson	54	hsa-mir-361-3p	2.22375e-12	-
B-CLL Leukemia Haslinger	28	hsa-mir-376	0.000318075	-
B-CLL Leukemia Haslinger	54	hsa-mir-1321	3.26561e-05	-
SMCL Lung Bhattacharjee	31	hsa-mir-513a-3p	1.28447e-08	-
AD Lung Bhattacharjee	41	hsa-mir-296	6.11475e-05	-
AD Lung Stearman	32	hsa-mir-588	0.00048611	-
GCT Seminoma Korkola	0	hsa-mir-1251	3.03334e-05	-
AD Lung Bhattacharjee	14	hsa-mir-938	0.000464954	-
GCT Seminoma Korkola	108	hsa-mir-590	0.000599625	-
ODGL Brain Sun	65	hsa-mir-495	3.896e-08	-
B-CLL Leukemia Haslinger	16	hsa-mir-1285	8.55201e-08	-
AD Ovarian Welsh	31	hsa-mir-548c-3p	1.17458e-06	-
GLB Brain Sun	37	hsa-mir-1256	0.000394523	-
IDC Breast Radvanyi	18	hsa-mir-1207-3p	0.000171598	-
AD Lung Bhattacharjee	8	hsa-mir-1324	2.99228e-05	-
IDC Breast Radvanyi	65	hsa-mir-802	3.44011e-17	-
CCC Ovarian Hendrix	56	hsa-mir-587	0.000320898	-
SQ Lung Bhattacharjee	23	hsa-mir-586	0.000126996	-
GLB Brain Sun	27	hsa-mir-889	4.14416e-06	-
CA Bladder Dyrskjot	32	hsa-mir-1270	1.86201e-06	-
CA Bladder Dyrskjot	58	hsa-mir-328	0.000324179	-
COID Lung Bhattacharjee	74	hsa-mir-513a-3p	1.45815e-07	-
B-CLL Leukemia Haslinger	43	hsa-mir-483-3p	6.8553e-05	-
HSCC Head-Neck Cromer	26	hsa-mir-885	1.4402e-05	-
GLB Brain Sun	35	hsa-mir-922	0.000367795	-
ML Melanoma Talantov	10	hsa-mir-1180	0.000368404	-
AD Ovarian Welsh	8	hsa-mir-1260	3.06959e-05	-
CCC Ovarian Hendrix	58	hsa-mir-586	3.46607e-08	-
AC Brain Sun	50	hsa-mir-483-3p	0.000171585	-
BPH Prostate Dhanasekaran	1	hsa-mir-579	0.00020642	-
ODGL Brain Sun	27	hsa-mir-136	0.000113816	-
COID Lung Bhattacharjee	43	hsa-mir-658	7.49519e-05	-
GL Brain Rickman	17	hsa-mir-146b-3p	0.000528862	-
CA Breast Richardson	19	hsa-mir-586	0.000229107	-
SRS Ovarian Hendrix	4	hsa-mir-1250	1.87031e-05	-
CA Breast Sorlie	16	hsa-mir-579	3.18938e-05	-
HSCC Head-Neck Cromer	18	hsa-mir-615-3p	0.000195451	-
MPM Mesothelioma Gordon	62	hsa-mir-708	0.000307699	-
ML Melanoma Talantov	40	hsa-mir-296	4.55914e-06	-
MUC Ovarian Hendrix	54	hsa-mir-921	1.10808e-05	-
CA Bladder Dyrskjot	12	hsa-mir-1244	0.000260354	-
TU Prostate Lapointe	33	hsa-mir-548c-3p	1.74935e-07	-
MPC Prostate Dhanasekaran	27	hsa-mir-1271	0.000148676	-
CA Renal Higgins	4	hsa-mir-34b	2.00039e-07	-
END Ovarian Hendrix	4	hsa-mir-612	0.00056313	-
MPM Mesothelioma Gordon	44	hsa-mir-338	8.54693e-05	-
B-CLL Leukemia Haslinger	17	hsa-mir-590-3p	1.39402e-13	-
CA Bladder Dyrskjot	48	hsa-mir-520b	0.000475673	-
CCC Ovarian Hendrix	46	hsa-mir-340	7.26315e-09	-
HSCC Head-Neck Chung	1	hsa-mir-450b	3.19891e-05	-
COID Lung Bhattacharjee	6	hsa-mir-874	4.14838e-05	-
CA Bladder Dyrskjot	37	hsa-mir-548n	9.02198e-08	-
CA Bladder Dyrskjot	14	hsa-mir-944	3.75938e-05	-
SRS Ovarian Hendrix	44	hsa-mir-584	0.000486209	-
ODGL Brain Sun	22	hsa-mir-423	7.28408e-09	-
AD Lung Bhattacharjee	46	hsa-mir-548c-3p	3.06271e-06	-
AD Lung Stearman	19	hsa-mir-370	2.84889e-06	-
GL Brain Rickman	8	hsa-mir-634	0.000383758	-
SRS Ovarian Hendrix	3	hsa-mir-146b-3p	0.000175563	-
CA Bladder Dyrskjot	56	hsa-mir-1238	2.30968e-06	-
IDC Breast Radvanyi	43	hsa-mir-1224	4.99668e-05	-
ILC Breast Radvanyi	19	hsa-mir-338-3p	0.000520796	-
SMCL Lung Bhattacharjee	22	hsa-mir-548n	9.60879e-05	-
SRS Ovarian Hendrix	53	hsa-mir-576	3.871e-05	-
CA Bladder Dyrskjot	6	hsa-mir-939	1.03439e-05	-
AD Lung Bhattacharjee	7	hsa-mir-1305	2.18951e-11	-
AD Lung Beer	8	hsa-mir-637	3.06708e-05	-
CA Bladder Dyrskjot	49	hsa-mir-432	8.7237e-06	-
BPH Prostate Dhanasekaran	15	hsa-mir-1259	9.49216e-05	-
OD Brain Bredel	21	hsa-mir-548c-3p	0.000226458	-
TU Prostate Lapointe	38	hsa-mir-633	9.66046e-05	-
AD Ovarian Welsh	5	hsa-mir-455	9.97708e-05	-
GL Brain Rickman	29	hsa-mir-568	3.22538e-08	-
IDC Breast Radvanyi	2	hsa-mir-513a-3p	3.57059e-05	-
GL Brain Bredel	31	hsa-mir-615-3p	2.08586e-05	-
AC Brain Sun	8	hsa-mir-196a	0.000415339	-
SRS Ovarian Hendrix	19	hsa-mir-135a	6.95346e-06	-
ML Melanoma Talantov	29	hsa-mir-1257	0.00027138	-
AD Lung Stearman	0	hsa-mir-369-3p	2.29527e-06	-
CA Bladder Dyrskjot	47	hsa-mir-197	7.2642e-07	-
COID Lung Bhattacharjee	72	hsa-mir-548n	9.38134e-06	-
AD Ovarian Welsh	30	hsa-mir-1204	0.000439516	-
GLB Brain Sun	58	hsa-mir-1287	0.000103913	-
SQ Lung Bhattacharjee	43	hsa-mir-635	0.000124798	-
AC Brain Sun	34	hsa-mir-223	2.97479e-05	-
AD Lung Stearman	18	hsa-mir-1257	0.000397558	-
GCT Seminoma Korkola	68	hsa-mir-1182	6.00594e-05	-
COID Lung Bhattacharjee	45	hsa-mir-615	5.02428e-06	-
GL Brain Bredel	25	hsa-mir-513b	0.000419468	-
ML Melanoma Talantov	19	hsa-mir-548c-3p	7.98968e-10	-
MUC Ovarian Hendrix	32	hsa-mir-490-3p	8.99879e-05	-
BPH Prostate Dhanasekaran	8	hsa-mir-1246	7.27444e-06	-
B-CLL Leukemia Haslinger	5	hsa-mir-622	6.58391e-05	-
PPC Prostate Dhanasekaran	39	hsa-mir-139-3p	0.000138404	-
AD Pancreas Logsdon	1	hsa-mir-1247	1.53348e-05	-
CCC Ovarian Hendrix	2	hsa-mir-423	1.47632e-06	-
SQ Lung Bhattacharjee	40	hsa-mir-339-3p	0.000101826	-
GL Brain Bredel	30	hsa-mir-342	3.59567e-07	-
MCA Breast Radvanyi	7	hsa-mir-324-3p	3.23286e-06	-
B-CLL Leukemia Haslinger	0	hsa-mir-409	0.000378892	-
TU Prostate Lapointe	25	hsa-mir-130a	3.792e-05	-
MPM Mesothelioma Gordon	65	hsa-mir-548n	2.71429e-09	-
SRS Ovarian Hendrix	43	hsa-mir-299-3p	5.54048e-06	-
B-CLL Leukemia Haslinger	56	hsa-mir-548b-3p	0.000133402	-
MM Myeloma Zhan	14	hsa-mir-548l	0.000147742	-
AD Lung Beer	14	hsa-mir-542	0.000318042	-
SRS Ovarian Hendrix	80	hsa-mir-324	4.33705e-05	-
OD Brain Bredel	40	hsa-mir-216b	9.25445e-05	-
END Ovarian Hendrix	35	hsa-mir-1276	0.000277741	-
CCC Ovarian Hendrix	12	hsa-mir-508-3p	3.67925e-05	-
MM Myeloma Zhan	43	hsa-mir-124	2.37409e-05	-
END Ovarian Hendrix	16	hsa-mir-588	3.81805e-06	-
MPM Mesothelioma Gordon	13	hsa-mir-585	4.84748e-05	-
HSCC Head-Neck Cromer	12	hsa-mir-513a-3p	2.34292e-05	-
COID Lung Bhattacharjee	24	hsa-mir-342	7.55059e-05	-
IDC Breast Radvanyi	27	hsa-mir-323	0.000569837	-
ODGL Brain Sun	50	hsa-mir-217	0.000123791	-
AD Lung Bhattacharjee	24	hsa-mir-608	1.22416e-06	-
GCT Seminoma Korkola	71	hsa-mir-361-3p	4.76477e-07	-
AD Lung Beer	12	hsa-mir-378	0.000355275	-
SQ Lung Bhattacharjee	29	hsa-mir-486-3p	8.11821e-06	-
MM Myeloma Zhan	35	hsa-mir-129	0.000200071	-
CCC Ovarian Hendrix	4	hsa-mir-194	1.44893e-05	-
AD Ovarian Welsh	16	hsa-mir-548l	0.00012021	-
AD Lung Beer	34	hsa-mir-646	0.00025737	-
GBM Brain Liang	2	hsa-mir-548c-3p	0.000318973	-
OD Brain Bredel	30	hsa-mir-1306	0.000381469	-
END Ovarian Hendrix	75	hsa-mir-489	0.000119996	-
AD Lung Beer	10	hsa-mir-600	1.43749e-06	-
MPC Prostate Dhanasekaran	18	hsa-mir-1263	1.48357e-05	-
PPC Prostate Dhanasekaran	35	hsa-mir-663b	0.000144273	-
MPM Mesothelioma Gordon	61	hsa-mir-1287	2.33482e-05	-
AO Brain Bredel	32	hsa-mir-564	5.12572e-06	-
CA Bladder Dyrskjot	75	hsa-mir-513	7.29425e-05	-
CA Colon Graudens	28	hsa-mir-508	0.000295908	-
ML Melanoma Talantov	3	hsa-mir-548n	4.08253e-06	-
GCT Seminoma Korkola	30	hsa-mir-588	0.000275648	-
PPC Prostate Dhanasekaran	31	hsa-mir-515-3p	0.000197799	-
ODGL Brain Sun	49	hsa-mir-423	1.07822e-05	-
CA Bladder Dyrskjot	62	hsa-mir-637	1.36378e-05	-
CA Bladder Dyrskjot	46	hsa-mir-342	3.5856e-08	-
HSCC Head-Neck Cromer	19	hsa-mir-548l	1.74779e-07	-
AD Lung Beer	40	hsa-mir-561	7.29479e-05	-
CCC Ovarian Hendrix	18	hsa-mir-326	7.22338e-06	-
MUC Ovarian Hendrix	61	hsa-mir-410	4.04577e-06	-
AC Brain Sun	19	hsa-mir-485	1.27345e-05	-
COID Lung Bhattacharjee	14	hsa-mir-557	0.000108663	-
CA Bladder Dyrskjot	38	hsa-mir-1281	0.000191838	-
CLL Lymphoma Alizadeh	0	hsa-mir-548j	0.000459332	-
SMCL Lung Bhattacharjee	29	hsa-mir-548c-3p	9.77295e-08	-
SQ Lung Bhattacharjee	21	hsa-mir-455	0.000112719	-
MM Myeloma Zhan	9	hsa-mir-185	7.75055e-05	-
HSCC Head-Neck Cromer	8	hsa-mir-142	1.01049e-07	-
CA Bladder Dyrskjot	18	hsa-mir-1291	2.28844e-05	-
PPC Prostate Dhanasekaran	4	hsa-mir-939	9.39908e-06	-
DLBCL Lymphoma Alizadeh	1	hsa-mir-16	8.17115e-05	-
PPC Prostate Dhanasekaran	14	hsa-mir-1202	0.000130297	-
SRS Ovarian Hendrix	1	hsa-mir-409-3p	9.82018e-05	-
COID Lung Bhattacharjee	66	hsa-mir-507	9.7079e-06	-
MM Myeloma Zhan	10	hsa-mir-1305	6.74781e-06	-
ME Melanoma Hoek	37	hsa-mir-380	1.50337e-07	-
ODGL Brain Sun	62	hsa-mir-1294	6.04545e-05	-
CA Bladder Dyrskjot	21	hsa-mir-944	2.51375e-06	-
COID Lung Bhattacharjee	0	hsa-mir-518d	2.5655e-05	-
CA Colon Graudens	6	hsa-mir-658	8.77981e-05	-
GCT Seminoma Korkola	88	hsa-mir-338	3.32466e-08	-
AD Lung Stearman	35	hsa-mir-668	0.000306085	-
B-CLL Leukemia Haslinger	45	hsa-mir-889	9.31979e-06	-
HSCC Head-Neck Cromer	27	hsa-mir-615	5.07256e-06	-
GCT Seminoma Korkola	66	hsa-mir-1291	1.91605e-05	-
AD Lung Beer	22	hsa-mir-525	0.000251267	-
AO Brain Bredel	0	hsa-mir-635	9.52327e-05	-
MUC Ovarian Hendrix	75	hsa-mir-512-3p	1.28466e-06	-
SQ Lung Bhattacharjee	14	hsa-mir-486-3p	5.22772e-06	-
MPC Prostate Dhanasekaran	23	hsa-mir-302f	0.000532122	-
IDC Breast Radvanyi	46	hsa-mir-675	0.000483213	-
CA Bladder Dyrskjot	35	hsa-mir-486-3p	0.000273385	-
CCC Ovarian Hendrix	45	hsa-mir-1250	2.29793e-05	-
ODGL Brain Sun	1	hsa-mir-647	1.95908e-05	-
CA Breast Richardson	62	hsa-mir-622	0.000211265	-
OD Brain Bredel	15	hsa-mir-765	0.000578248	-
B-CLL Leukemia Haslinger	8	hsa-mir-939	9.78591e-06	-
CA Breast Sorlie	8	hsa-mir-1255a	3.53133e-05	-
GLB Brain Sun	50	hsa-mir-548c-3p	2.66185e-06	-
GCT Seminoma Korkola	82	hsa-mir-576	0.000285312	-
END Ovarian Hendrix	23	hsa-mir-22	6.91239e-05	-
OD Brain Bredel	62	hsa-let-7f	0.000585924	-
MM Myeloma Zhan	36	hsa-mir-1273	0.000403952	-
CA Colon Graudens	0	hsa-mir-138	6.28599e-05	-
GCT Seminoma Korkola	29	hsa-mir-548c-3p	3.73993e-08	-
B-CLL Leukemia Haslinger	15	hsa-mir-654-3p	2.07749e-05	-
ILC Breast Radvanyi	6	hsa-mir-579	8.7163e-06	-
MUC Ovarian Hendrix	12	hsa-mir-658	0.000144043	-
TU Prostate Lapointe	1	hsa-mir-590-3p	3.14524e-07	-
HSCC Head-Neck Cromer	25	hsa-mir-495	1.15471e-06	-
CLL Lymphoma Alizadeh	1	hsa-mir-1204	3.50319e-05	-
AO Brain Bredel	18	hsa-mir-497	0.000198786	-
TU Prostate Lapointe	31	hsa-mir-339-3p	5.78698e-05	-
CA Breast Richardson	55	hsa-mir-544	1.28635e-06	-
HSCC Head-Neck Chung	8	hsa-mir-410	4.97554e-05	-
IDC Breast Radvanyi	26	hsa-mir-886	0.000540902	-
SRS Ovarian Hendrix	28	hsa-mir-186	1.67365e-06	-
BPH Prostate Dhanasekaran	11	hsa-mir-369-3p	0.000568201	-
SQ Lung Bhattacharjee	7	hsa-mir-765	5.75235e-05	-
ML Melanoma Talantov	7	hsa-mir-296	6.01546e-07	-
ME Melanoma Hoek	33	hsa-mir-1265	0.000457688	-
GCT Seminoma Korkola	50	hsa-mir-376	2.32994e-06	-
END Ovarian Hendrix	22	hsa-mir-944	1.00092e-05	-
MUC Ovarian Hendrix	22	hsa-mir-1293	5.7968e-05	-
AC Brain Sun	7	hsa-mir-548l	1.20213e-07	-
AC Brain Sun	16	hsa-mir-655	1.37985e-06	-
HSCC Head-Neck Chung	5	hsa-mir-1202	0.000335288	-
PPC Prostate Dhanasekaran	23	hsa-mir-518a	7.90914e-05	-
GLB Brain Sun	55	hsa-mir-32	0.000230839	-
MUC Ovarian Hendrix	31	hsa-mir-342	2.61018e-05	-
END Ovarian Hendrix	69	hsa-mir-186	6.8831e-06	-
ODGL Brain Sun	48	hsa-mir-384	0.000253138	-
TU Prostate Lapointe	4	hsa-mir-185	0.000290147	-
AD Lung Beer	5	hsa-mir-1292	9.07418e-05	-
PPC Prostate Dhanasekaran	10	hsa-mir-889	8.82105e-06	-
CA Bladder Dyrskjot	82	hsa-mir-656	1.3727e-06	-
AD Lung Bhattacharjee	4	hsa-mir-1321	3.67964e-07	-
IDC Breast Radvanyi	24	hsa-mir-1291	4.64338e-05	-
B-CLL Leukemia Haslinger	37	hsa-mir-323-3p	6.95101e-10	-
MPM Mesothelioma Gordon	17	hsa-mir-1296	0.000161062	-
AC Brain Sun	6	hsa-mir-139	0.000306314	-
GLB Brain Sun	4	hsa-mir-542	4.27541e-07	-
ODGL Brain Sun	30	hsa-mir-483	0.00041214	-
ODGL Brain Sun	60	hsa-let-7d	0.000130896	-
COID Lung Bhattacharjee	80	hsa-mir-548l	6.43232e-13	-
ODGL Brain Sun	32	hsa-mir-153	2.79798e-06	-
GCT Seminoma Korkola	17	hsa-mir-615	2.79158e-07	-
B-CLL Leukemia Haslinger	25	hsa-mir-548c-3p	7.95287e-06	-
AC Brain Sun	22	hsa-mir-185	3.82397e-05	-
BPH Prostate Dhanasekaran	12	hsa-mir-939	8.79907e-05	-
CA Bladder Dyrskjot	63	hsa-mir-372	1.76881e-07	-
B-CLL Leukemia Haslinger	13	hsa-mir-892b	0.000527397	-
GL Brain Bredel	46	hsa-mir-548l	1.15861e-05	-
MPM Mesothelioma Gordon	41	hsa-mir-381	0.000443852	-
ODGL Brain Sun	10	hsa-mir-208a	0.000136267	-
MPC Prostate Dhanasekaran	44	hsa-mir-576-3p	9.02002e-05	-
CA Colon Graudens	10	hsa-mir-1225	0.000267591	-
PPC Prostate Dhanasekaran	38	hsa-mir-607	2.03245e-05	-
GLB Brain Sun	29	hsa-mir-1275	9.57879e-09	-
SQ Lung Bhattacharjee	13	hsa-mir-296	2.04557e-08	-
END Ovarian Hendrix	62	hsa-mir-571	6.36675e-05	-
AC Brain Sun	23	hsa-mir-1207-3p	0.000547066	-
CA Bladder Dyrskjot	7	hsa-mir-361	0.000142136	-
ODGL Brain Sun	39	hsa-mir-1283	3.4751e-05	-
CLL Lymphoma Alizadeh	13	hsa-mir-423	0.000349636	-
CCC Ovarian Hendrix	25	hsa-mir-744	0.000564266	-
SQ Lung Bhattacharjee	18	hsa-mir-410	2.11719e-05	-
TU Prostate Lapointe	39	hsa-mir-656	3.01226e-07	-
GL Brain Bredel	79	hsa-mir-340	2.03891e-18	-
PPC Prostate Dhanasekaran	41	hsa-mir-369-3p	3.86126e-06	-
MUC Ovarian Hendrix	20	hsa-mir-640	0.000235199	-
PPC Prostate Dhanasekaran	9	hsa-mir-661	1.10458e-05	-
MUC Ovarian Hendrix	52	hsa-mir-541	0.00046487	-
GBM Brain Liang	5	hsa-mir-939	0.00056305	-
FL Lymphoma Alizadeh	7	hsa-mir-1282	0.000138941	-
AD Lung Bhattacharjee	47	hsa-mir-1245	2.2151e-06	-
B-CLL Leukemia Haslinger	62	hsa-mir-548c-3p	7.99852e-10	-
CCC Ovarian Hendrix	60	hsa-mir-1305	3.34786e-05	-
B-CLL Leukemia Haslinger	29	hsa-mir-1270	0.000171591	-
HSCC Head-Neck Chung	3	hsa-mir-1286	9.91441e-06	-
MM Myeloma Zhan	16	hsa-mir-134	8.10521e-05	-
GCT Seminoma Korkola	60	hsa-mir-551a	6.95434e-05	-
COID Lung Bhattacharjee	21	hsa-mir-944	8.18826e-10	-
IDC Breast Radvanyi	8	hsa-mir-631	0.000564379	-
CA Bladder Dyrskjot	70	hsa-mir-502	2.28624e-05	-
CA Breast Richardson	23	hsa-mir-544	0.000153218	-
AO Brain Bredel	38	hsa-mir-1282	0.000299426	-
ODGL Brain Sun	53	hsa-mir-548n	5.14386e-09	-
MUC Ovarian Hendrix	24	hsa-mir-361-3p	0.000241059	-
GLB Brain Sun	5	hsa-mir-515	0.000373578	-
MPM Mesothelioma Gordon	24	hsa-mir-361-3p	0.000101355	-
AD Ovarian Welsh	17	hsa-mir-1321	1.68139e-05	-
HSCC Head-Neck Chung	6	hsa-mir-590-3p	1.28743e-05	-
MM Myeloma Zhan	3	hsa-mir-548c-3p	2.84503e-14	-
CA Colon Graudens	17	hsa-mir-597	7.44184e-05	-
B-CLL Leukemia Haslinger	46	hsa-mir-1247	0.000479165	-
CA Bladder Dyrskjot	79	hsa-mir-508-3p	0.00023817	-
CCC Ovarian Hendrix	47	hsa-mir-122	7.65341e-06	-
RCCC Renal Lenburg	3	hsa-mir-888	0.00018121	-
AD Ovarian Welsh	29	hsa-mir-1225-3p	0.000495059	-
ML Melanoma Talantov	18	hsa-mir-513a-3p	1.30264e-08	-
MPM Mesothelioma Gordon	38	hsa-mir-145	8.33285e-05	-
CA Breast Sorlie	19	hsa-mir-129	8.52253e-06	-
CA Renal Higgins	10	hsa-mir-483-3p	0.000138161	-
MPM Mesothelioma Gordon	42	hsa-mir-539	3.03547e-05	-
ME Melanoma Hoek	25	hsa-mir-26a	2.11457e-05	-
GL Brain Rickman	4	hsa-mir-361	3.19138e-05	-
GLB Brain Sun	28	hsa-mir-323-3p	4.84141e-05	-
GL Brain Rickman	10	hsa-mir-648	3.05245e-06	-
AD Lung Beer	33	hsa-mir-379	6.19358e-05	-
MPC Prostate Dhanasekaran	5	hsa-mir-211	0.000182393	-
TU Prostate Lapointe	29	hsa-mir-522	2.97244e-11	-
END Ovarian Hendrix	13	hsa-mir-23a	6.11229e-07	-
CA Bladder Dyrskjot	31	hsa-mir-656	1.33718e-05	-
AD Lung Stearman	25	hsa-mir-519a	8.68259e-05	-
GL Brain Bredel	77	hsa-mir-744	1.43835e-05	-
COID Lung Bhattacharjee	16	hsa-mir-376a	0.000262419	-
MPM Mesothelioma Gordon	1	hsa-mir-1224	2.47765e-05	-
RCCC Renal Lenburg	10	hsa-mir-1273	0.000324812	-
ILC Breast Radvanyi	3	hsa-mir-383	0.000402616	-
ML Melanoma Talantov	12	hsa-mir-324-3p	6.94417e-05	-
MCA Breast Radvanyi	17	hsa-mir-219	1.57344e-07	-
B-CLL Leukemia Haslinger	66	hsa-mir-939	3.01249e-10	-
GL Brain Bredel	27	hsa-mir-181	0.000133619	-
B-CLL Leukemia Haslinger	10	hsa-mir-454	1.68019e-05	-
OD Brain Bredel	52	hsa-mir-411	0.000409711	-
MPM Mesothelioma Gordon	16	hsa-mir-590-3p	9.51149e-17	-
CA Bladder Dyrskjot	45	hsa-mir-608	4.59802e-07	-
CA Bladder Dyrskjot	59	hsa-mir-374a	8.53515e-06	-
SQ Lung Bhattacharjee	22	hsa-mir-607	1.71476e-06	-
MPC Prostate Dhanasekaran	14	hsa-mir-502	0.000300801	-
B-CLL Leukemia Haslinger	49	hsa-mir-1227	0.00034531	-
B-CLL Leukemia Haslinger	9	hsa-mir-1245	0.000110184	-
PPC Prostate Dhanasekaran	19	hsa-mir-144	3.06824e-06	-
GBM Brain Liang	1	hsa-mir-423	7.20778e-07	-
CA Bladder Dyrskjot	67	hsa-mir-630	0.000123706	-
MPC Prostate Dhanasekaran	35	hsa-mir-203	1.8627e-06	-
GLB Brain Sun	8	hsa-mir-501	3.41506e-06	-
MM Myeloma Zhan	0	hsa-mir-1207	3.31779e-06	-
AC Brain Sun	4	hsa-mir-371-3p	8.51948e-05	-
CCC Ovarian Hendrix	27	hsa-mir-556	0.000258408	-
SQ Lung Bhattacharjee	5	hsa-mir-595	5.58092e-05	-
COID Lung Bhattacharjee	60	hsa-mir-516a-3p	5.93956e-05	-
MPC Prostate Dhanasekaran	42	hsa-mir-331	2.97217e-05	-
COID Lung Bhattacharjee	8	hsa-mir-340	7.24426e-07	-
MUC Ovarian Hendrix	25	hsa-mir-582	3.54223e-06	-
AD Lung Bhattacharjee	28	hsa-mir-548a-3p	5.98131e-06	-
AD Lung Bhattacharjee	64	hsa-mir-765	2.84671e-06	-
MPM Mesothelioma Gordon	28	hsa-mir-590-3p	0.000287627	-
MPM Mesothelioma Gordon	63	hsa-mir-548c-3p	2.5066e-09	-
B-CLL Leukemia Haslinger	23	hsa-mir-548o	0.000480335	-
MPM Mesothelioma Gordon	6	hsa-mir-192	0.000120946	-
TU Prostate Lapointe	24	hsa-mir-548g	1.21572e-06	-
OD Brain Bredel	7	hsa-mir-23b	2.0282e-06	-
COID Lung Bhattacharjee	68	hsa-mir-1272	0.00018659	-
PDC Pancreas Ishikawa	2	hsa-mir-448	8.41321e-05	-
GLB Brain Sun	62	hsa-mir-495	0.000134046	-
MM Myeloma Zhan	40	hsa-mir-612	0.000176115	-
CA Breast Richardson	17	hsa-mir-423	2.84889e-12	-
ML Melanoma Talantov	28	hsa-mir-1207	1.65678e-07	-
CA Renal Higgins	20	hsa-mir-1261	0.000372363	-
ML Melanoma Talantov	4	hsa-mir-146b-3p	0.000174949	-
ODGL Brain Sun	17	hsa-mir-548l	1.03823e-07	-
GLB Brain Sun	10	hsa-mir-409	6.76943e-05	-
MM Myeloma Zhan	33	hsa-mir-507	4.9534e-06	-
TU Prostate Lapointe	21	hsa-mir-608	2.73347e-06	-
RCCC Renal Lenburg	2	hsa-mir-499	4.25161e-06	-
ME Melanoma Hoek	6	hsa-mir-186	1.21788e-05	-
SMCL Lung Bhattacharjee	52	hsa-mir-939	8.05122e-05	-
GLB Brain Sun	63	hsa-mir-939	0.000398514	-
MM Myeloma Zhan	32	hsa-mir-379	0.000580382	-
AD Lung Stearman	33	hsa-mir-1293	1.12615e-05	-
CCC Ovarian Hendrix	42	hsa-mir-590-3p	4.63318e-06	-
GL Brain Bredel	39	hsa-mir-572	0.000290782	-
HSCC Head-Neck Chung	2	hsa-mir-944	0.00016901	-
ODGL Brain Sun	28	hsa-mir-219-2-3p	0.000579468	-
COID Lung Bhattacharjee	19	hsa-mir-615	0.00014539	-
SQ Lung Bhattacharjee	0	hsa-mir-662	5.7422e-05	-
MPM Mesothelioma Gordon	5	hsa-mir-603	0.000121912	-
AC Brain Sun	2	hsa-mir-548c-3p	3.41789e-07	-
GCT Seminoma Korkola	104	hsa-mir-557	0.000174051	-
CA Bladder Dyrskjot	43	hsa-mir-939	6.16153e-05	-
FL Lymphoma Alizadeh	9	hsa-mir-942	0.000136728	-
GL Brain Rickman	1	hsa-mir-1283	0.000424966	-
PPC Prostate Dhanasekaran	8	hsa-mir-340	0.000508247	-
CA Breast Richardson	67	hsa-mir-889	8.07679e-06	-
HSCC Head-Neck Cromer	2	hsa-mir-374b	9.20564e-06	-
ODGL Brain Sun	61	hsa-mir-142	0.000296262	-
BPH Prostate Dhanasekaran	16	hsa-mir-302f	1.08802e-05	-
CA Bladder Dyrskjot	27	hsa-mir-129	6.69385e-05	-
HSCC Head-Neck Cromer	5	hsa-mir-486-3p	4.46484e-05	-
MM Myeloma Zhan	17	hsa-mir-495	3.09756e-07	-
ODGL Brain Sun	58	hsa-mir-889	2.01789e-06	-
COID Lung Bhattacharjee	86	hsa-mir-410	1.85198e-06	-
HSCC Head-Neck Cromer	13	hsa-mir-622	0.000123772	-
COID Lung Bhattacharjee	92	hsa-mir-920	0.000526041	-
AD Lung Bhattacharjee	60	hsa-mir-495	2.45978e-06	-
END Ovarian Hendrix	6	hsa-mir-890	2.65055e-06	-
SRS Ovarian Hendrix	70	hsa-mir-433	1.12621e-06	-
SMCL Lung Bhattacharjee	32	hsa-mir-582	1.16236e-05	-
ILC Breast Radvanyi	15	hsa-mir-518b	0.000273711	-
ML Melanoma Talantov	34	hsa-mir-548n	6.91249e-09	-
AD Lung Bhattacharjee	33	hsa-mir-490	5.04526e-05	-
CCC Ovarian Hendrix	57	hsa-mir-590	0.000391567	-
GCT Seminoma Korkola	4	hsa-mir-376	0.000177892	-
MM Myeloma Zhan	6	hsa-mir-600	0.000129022	-
GCT Seminoma Korkola	42	hsa-mir-637	0.000565519	-
AC Brain Sun	44	hsa-mir-939	4.5031e-09	-
GL Brain Bredel	38	hsa-mir-486-3p	1.99716e-07	-
CA Renal Higgins	14	hsa-mir-549	2.83953e-05	-
CA Breast Richardson	34	hsa-mir-186	1.78335e-13	-
PPC Prostate Dhanasekaran	22	hsa-mir-561	5.0177e-08	-
CCC Ovarian Hendrix	11	hsa-mir-602	0.000244248	-
AD Lung Bhattacharjee	9	hsa-mir-154	0.000580128	-
SRS Ovarian Hendrix	36	hsa-mir-890	0.000614411	-
COID Lung Bhattacharjee	7	hsa-mir-608	0.000285439	-
AD Lung Beer	44	hsa-mir-452	0.000208474	-
AD Lung Beer	46	hsa-mir-606	1.91111e-05	-
CA Bladder Dyrskjot	28	hsa-mir-296	2.18705e-05	-
AC Brain Sun	11	hsa-mir-574-3p	6.73184e-05	-
AD Lung Bhattacharjee	65	hsa-mir-486-3p	0.000152303	-
COID Lung Bhattacharjee	36	hsa-mir-890	0.000161298	-
GLB Brain Sun	76	hsa-mir-139	3.31743e-05	-
COID Lung Bhattacharjee	85	hsa-mir-1180	0.000353754	-
CA Breast Richardson	38	hsa-mir-103	1.94457e-07	-
PPC Prostate Dhanasekaran	7	hsa-mir-1202	0.000547774	-
GCT Seminoma Korkola	6	hsa-mir-448	5.33915e-05	-
CA Bladder Dyrskjot	68	hsa-mir-550	0.000398159	-
COID Lung Bhattacharjee	18	hsa-mir-663b	0.000354525	-
ME Melanoma Hoek	44	hsa-mir-1183	5.25596e-08	-
DLBCL Lymphoma Alizadeh	4	hsa-mir-297	0.000102804	-
SRS Ovarian Hendrix	38	hsa-mir-17	8.61331e-05	-
GCT Seminoma Korkola	62	hsa-mir-144	9.85307e-06	-
SMCL Lung Bhattacharjee	36	hsa-mir-296	1.79372e-06	-
AD Lung Bhattacharjee	16	hsa-mir-361-3p	6.21184e-06	-
CCC Ovarian Hendrix	29	hsa-mir-636	0.000218326	-
AD Lung Bhattacharjee	20	hsa-mir-1245	4.93603e-07	-
GLB Brain Sun	15	hsa-mir-219-1-3p	6.28951e-06	-
GLB Brain Sun	57	hsa-mir-921	7.37566e-05	-
AD Lung Beer	4	hsa-mir-1183	1.53972e-05	-
GLB Brain Sun	67	hsa-mir-544	3.09667e-07	-
B-CLL Leukemia Haslinger	61	hsa-mir-588	0.000290466	-
COID Lung Bhattacharjee	67	hsa-mir-181d	0.000603461	-
MUC Ovarian Hendrix	35	hsa-mir-340	1.91181e-08	-
CA Colon Graudens	4	hsa-mir-144	2.99419e-06	-
AD Lung Beer	9	hsa-mir-548k	1.82519e-07	-
GCT Seminoma Korkola	48	hsa-mir-455	0.000192751	-
GCT Seminoma Korkola	14	hsa-mir-340	1.72417e-06	-
MPC Prostate Dhanasekaran	10	hsa-mir-554	0.000168264	-
ODGL Brain Sun	23	hsa-mir-1225	0.000182529	-
AC Brain Sun	1	hsa-mir-642	4.7153e-05	-
MPM Mesothelioma Gordon	21	hsa-mir-548c-3p	5.38981e-10	-
TU Prostate Lapointe	7	hsa-mir-579	2.34882e-09	-
CA Breast Richardson	31	hsa-mir-376a	0.000581498	-
IDC Breast Radvanyi	51	hsa-mir-548n	2.3677e-07	-
GLB Brain Sun	60	hsa-mir-548f	3.12251e-07	-
CA Breast Richardson	7	hsa-mir-590-3p	2.61987e-05	-
GCT Seminoma Korkola	92	hsa-mir-564	1.8756e-05	-
MM Myeloma Zhan	38	hsa-mir-652	0.000174084	-
OD Brain Bredel	5	hsa-mir-1180	0.000184744	-
AD Pancreas Logsdon	4	hsa-mir-22	0.000277647	-
PDC Pancreas Ishikawa	1	hsa-mir-106b	0.000224128	-
SRS Ovarian Hendrix	69	hsa-mir-29b	5.50074e-06	-
END Ovarian Hendrix	70	hsa-mir-939	1.49398e-07	-
CA Bladder Dyrskjot	26	hsa-mir-486	7.83309e-07	-
GLB Brain Sun	13	hsa-mir-744	0.000603573	-
AD Pancreas Logsdon	15	hsa-mir-130b	0.000605398	-
AD Ovarian Welsh	14	hsa-mir-338	2.13425e-06	-
ML Melanoma Talantov	33	hsa-mir-605	1.61649e-05	-
SRS Ovarian Hendrix	42	hsa-mir-1298	9.77849e-06	-
GCT Seminoma Korkola	10	hsa-mir-153	0.00019375	-
MPM Mesothelioma Gordon	11	hsa-mir-889	9.17089e-07	-
RCCC Renal Boer	11	hsa-mir-659	0.000194706	-
MM Myeloma Zhan	7	hsa-mir-645	0.000256879	-
PPC Prostate Dhanasekaran	12	hsa-mir-342-3p	6.39218e-05	-
GL Brain Bredel	52	hsa-mir-516a-3p	1.61946e-06	-
CA Breast Richardson	63	hsa-mir-561	7.96967e-06	-
CA Colon Graudens	36	hsa-mir-512-3p	3.63685e-07	-
TU Prostate Lapointe	35	hsa-mir-548a	5.27991e-05	-
SRS Ovarian Hendrix	12	hsa-mir-125a-3p	5.25266e-05	-
ML Melanoma Talantov	22	hsa-mir-570	1.66968e-05	-
MM Myeloma Zhan	49	hsa-mir-138	0.000244706	-
GBM Brain Liang	16	hsa-mir-663	2.4929e-05	-
GCT Seminoma Korkola	15	hsa-mir-1323	0.000155769	-
SMCL Lung Bhattacharjee	30	hsa-mir-655	4.14967e-08	-
GCT Seminoma Korkola	110	hsa-mir-1306	3.02628e-05	-
BPH Prostate Dhanasekaran	5	hsa-mir-1290	4.31298e-05	-
SQ Lung Bhattacharjee	9	hsa-mir-891a	2.16321e-05	-
CA Bladder Dyrskjot	8	hsa-mir-331	5.4655e-05	-
IDC Breast Radvanyi	12	hsa-mir-590-3p	4.83464e-05	-
SMCL Lung Bhattacharjee	57	hsa-mir-448	1.38145e-09	-
OD Brain Bredel	50	hsa-mir-1254	0.00026912	-
TU Prostate Lapointe	26	hsa-mir-663	6.26495e-07	-
GCT Seminoma Korkola	26	hsa-mir-374a	2.64581e-05	-
OD Brain Bredel	36	hsa-mir-326	0.000315988	-
GL Brain Rickman	16	hsa-mir-586	4.76659e-05	-
AC Brain Sun	27	hsa-mir-612	0.000162631	-
GCT Seminoma Korkola	2	hsa-mir-661	3.65047e-05	-
B-CLL Leukemia Haslinger	59	hsa-mir-1228	0.000144933	-
MM Myeloma Zhan	41	hsa-mir-339	1.98399e-05	-
GCT Seminoma Korkola	95	hsa-mir-548c-3p	6.75586e-11	-
COID Lung Bhattacharjee	61	hsa-mir-34c-3p	2.2499e-05	-
END Ovarian Hendrix	29	hsa-mir-944	0.000347953	-
GLB Brain Sun	42	hsa-mir-602	0.000127309	-
CA Breast Sorlie	4	hsa-mir-611	4.292e-05	-
GCT Seminoma Korkola	35	hsa-mir-18a	0.000590569	-
AD Ovarian Welsh	22	hsa-mir-1207	0.000144063	-
B-CLL Leukemia Haslinger	11	hsa-mir-34c-3p	0.000384596	-
GCT Seminoma Korkola	45	hsa-mir-183	0.000103017	-
DLBCL Lymphoma Alizadeh	9	hsa-mir-1277	0.000225187	-
CA Bladder Dyrskjot	19	hsa-mir-331-3p	4.55764e-07	-
HSCC Head-Neck Cromer	6	hsa-mir-1275	0.000221713	-
END Ovarian Hendrix	26	hsa-mir-656	3.57274e-08	-
B-CLL Leukemia Haslinger	1	hsa-mir-487a	5.33061e-09	-
RCCC Renal Lenburg	5	hsa-mir-515-3p	9.29525e-05	-
SMCL Lung Bhattacharjee	43	hsa-mir-671-3p	0.000437915	-
GCT Seminoma Korkola	58	hsa-mir-595	1.51013e-06	-
B-CLL Leukemia Haslinger	50	hsa-mir-296	0.000233149	-
TU Prostate Lapointe	6	hsa-mir-876-3p	0.000324998	-
MM Myeloma Zhan	24	hsa-mir-1259	0.000330827	-
PPC Prostate Dhanasekaran	3	hsa-mir-578	1.16455e-05	-
AD Lung Bhattacharjee	50	hsa-mir-642	5.69397e-05	-
AD Lung Bhattacharjee	74	hsa-mir-543	7.58706e-05	-
GL Brain Rickman	21	hsa-mir-495	3.71685e-05	-
CLL Lymphoma Alizadeh	10	hsa-mir-590	0.000327927	-
IDC Breast Radvanyi	42	hsa-mir-766	0.000456161	-
AD Lung Bhattacharjee	69	hsa-mir-522	4.93201e-10	-
OD Brain Bredel	61	hsa-mir-937	0.000101996	-
MM Myeloma Zhan	31	hsa-mir-512-3p	8.12803e-05	-
IDC Breast Radvanyi	39	hsa-mir-125a-3p	0.000512311	-
AD Lung Bhattacharjee	45	hsa-mir-340	6.91843e-08	-
AD Lung Bhattacharjee	58	hsa-mir-655	7.24578e-09	-
GCT Seminoma Korkola	93	hsa-mir-640	5.10836e-06	-
HSCC Head-Neck Cromer	4	hsa-mir-662	0.000280826	-
MPM Mesothelioma Gordon	8	hsa-mir-1180	1.20869e-06	-
AD Lung Stearman	5	hsa-mir-342-3p	1.18148e-06	-
GL Brain Rickman	3	hsa-mir-182	1.59708e-05	-
GCT Seminoma Korkola	67	hsa-mir-1266	2.87794e-05	-
COID Lung Bhattacharjee	39	hsa-mir-608	0.000130832	-
GCT Seminoma Korkola	1	hsa-mir-1234	4.72192e-05	-
GCT Seminoma Korkola	5	hsa-mir-1204	0.000522965	-
CA Bladder Dyrskjot	77	hsa-mir-620	0.00055255	-
ODGL Brain Sun	29	hsa-mir-509-3	0.000305758	-
B-CLL Leukemia Haslinger	12	hsa-mir-1302	0.000390653	-
AC Brain Sun	5	hsa-mir-637	0.000149584	-
GLB Brain Sun	74	hsa-mir-369-3p	7.85886e-05	-
COID Lung Bhattacharjee	42	hsa-mir-671	4.57336e-05	-
CA Bladder Dyrskjot	0	hsa-mir-643	0.000314026	-
GLB Brain Sun	2	hsa-mir-577	4.83612e-05	-
MPC Prostate Dhanasekaran	33	hsa-mir-886	0.000278531	-
ODGL Brain Sun	9	hsa-mir-186	3.30741e-06	-
ODGL Brain Sun	3	hsa-mir-889	6.19075e-07	-
GCT Seminoma Korkola	20	hsa-mir-495	5.2702e-07	-
MUC Ovarian Hendrix	47	hsa-mir-654	0.000586378	-
CCC Ovarian Hendrix	59	hsa-mir-1258	7.37607e-05	-
IDC Breast Radvanyi	63	hsa-mir-548h	0.000316845	-
GCT Seminoma Korkola	9	hsa-mir-296	4.54069e-11	-
GLB Brain Sun	24	hsa-mir-494	7.73632e-06	-
COID Lung Bhattacharjee	79	hsa-mir-508-3p	0.000523991	-
GCT Seminoma Korkola	56	hsa-mir-548m	7.5297e-06	-
MUC Ovarian Hendrix	40	hsa-mir-618	2.30345e-05	-
TU Prostate Lapointe	37	hsa-mir-509-3p	1.49642e-05	-
CCC Ovarian Hendrix	35	hsa-mir-607	4.232e-05	-
RCCC Renal Boer	5	hsa-mir-374a	0.000225536	-
END Ovarian Hendrix	41	hsa-mir-338	3.19741e-06	-
SMCL Lung Bhattacharjee	59	hsa-mir-340	8.26285e-06	-
GCT Seminoma Korkola	70	hsa-mir-939	5.96774e-09	-
CA Breast Richardson	56	hsa-mir-34b	9.68799e-06	-
MPM Mesothelioma Gordon	48	hsa-mir-606	4.92885e-05	-
AO Brain Bredel	21	hsa-mir-1203	0.000359483	-
COID Lung Bhattacharjee	28	hsa-mir-608	0.000125912	-
SRS Ovarian Hendrix	14	hsa-mir-1290	0.000463364	-
ML Melanoma Talantov	21	hsa-mir-450b	7.88656e-05	-
BPH Prostate Dhanasekaran	10	hsa-mir-624	2.77733e-05	-
