# Supplementary material for: A miRNA-regulatory network explains how dysregulated miRNAs perturb oncogenic processes across diverse cancers
Source: HighWire-hosted journal article supplement (doi:10.1101/gr.133991.111), 2012-06-28
Supplement: SuppTab7.xlsx [file SuppTab7.xlsx]

## Sheet: coincident_miRNA_and_go_terms (
Supplementary Table 7.
		miRvestigator		PITA		TargetScan
Dataset	Signature	miRNA	miR2Disease Validation	miRNA	miR2Disease Validation	miRNA	miR2Disease Validation	Overlap
GL Brain Rickman	9			hsa-mir-1207-5p		hsa-mir-1207-5p		1
CA Bladder Dyrskjot	64			hsa-mir-590-3p		hsa-mir-590-3p		1
GLB Brain Sun	67			hsa-mir-544 hsa-mir-544b		hsa-mir-544 hsa-mir-544b		1
GLB Brain Sun	2			hsa-mir-577		hsa-mir-577		1
CA Breast Richardson	2			hsa-mir-590-3p		hsa-mir-590-3p		1
B-CLL Leukemia Haslinger	53			hsa-mir-513a-3p		hsa-mir-513a-3p		1
AD Lung Beer	9			hsa-mir-548k		hsa-mir-548k		1
AD Lung Beer	31	hsa-mir-29b hsa-mir-29c hsa-mir-29a	Causal	hsa-mir-29b hsa-mir-29c hsa-mir-29a	Causal	hsa-mir-29b	Causal	1
AD Lung Bhattacharjee	58			hsa-mir-655		hsa-mir-655		1
COID Lung Bhattacharjee	74			hsa-mir-513a-3p		hsa-mir-513a-3p		1
SMCL Lung Bhattacharjee	22			hsa-mir-548n		hsa-mir-548n		1
AD Lung Stearman	18			hsa-mir-1257		hsa-mir-1257		1
CLL Lymphoma Alizadeh	10			hsa-mir-21 hsa-mir-590-5p	Dysregulated	hsa-mir-590-5p		1
ME Melanoma Hoek	35			hsa-mir-200b hsa-mir-200c hsa-mir-200a	Causal	hsa-mir-200b	Causal	1
AD Ovarian Welsh	25			hsa-mir-572	Dysregulated	hsa-mir-572	Dysregulated	1
CCC Ovarian Hendrix	42			hsa-mir-590-3p		hsa-mir-590-3p		1
CCC Ovarian Hendrix	4			hsa-mir-194		hsa-mir-194		1
SRS Ovarian Hendrix	73			hsa-mir-340		hsa-mir-340		1
END Ovarian Hendrix	35			hsa-mir-1276		hsa-mir-1276		1
MPC Prostate Dhanasekaran	35			hsa-mir-203		hsa-mir-203		1
TU Prostate Lapointe	39			hsa-mir-590-3p		hsa-mir-656		0
CA Bladder Dyrskjot	56			hsa-mir-335		hsa-mir-1238		0
CA Bladder Dyrskjot	36			hsa-mir-548n		hsa-mir-548c-3p		0
CA Bladder Dyrskjot	51			hsa-mir-1276				0
TU Prostate Lapointe	13					hsa-mir-497	Dysregulated	0
CA Bladder Dyrskjot	22					hsa-mir-663b hsa-mir-663		0
CA Bladder Dyrskjot	45					hsa-mir-608		0
TU Prostate Lapointe	14	hsa-mir-138-1*						0
TU Prostate Lapointe	17			hsa-mir-96	Dysregulated	hsa-mir-219-5p		0
TU Prostate Lapointe	33			hsa-mir-802		hsa-mir-548c-3p		0
TU Prostate Lapointe	18			hsa-mir-760				0
TU Prostate Lapointe	31			hsa-mir-631		hsa-mir-339-3p		0
CA Bladder Dyrskjot	53			hsa-mir-1206		hsa-mir-944		0
TU Prostate Lapointe	37			hsa-mir-199b-3p hsa-mir-199a-3p	Causal	hsa-mir-509-3p hsa-mir-509-3-5p		0
CA Bladder Dyrskjot	67					hsa-mir-630		0
CA Bladder Dyrskjot	82			hsa-mir-519d		hsa-mir-656		0
TU Prostate Lapointe	19					hsa-mir-296-5p	Dysregulated	0
CA Bladder Dyrskjot	81			hsa-mir-455-3p				0
CA Bladder Dyrskjot	14					hsa-mir-944		0
CA Bladder Dyrskjot	24					hsa-mir-663b hsa-mir-663		0
CA Bladder Dyrskjot	25			hsa-mir-550b hsa-mir-550a		hsa-mir-1204		0
CA Bladder Dyrskjot	26	hsa-mir-194		hsa-mir-1224-5p		hsa-mir-486-5p		0
CA Bladder Dyrskjot	27			hsa-mir-365		hsa-mir-129-5p		0
CA Bladder Dyrskjot	21			hsa-mir-590-3p		hsa-mir-944		0
CA Bladder Dyrskjot	48					hsa-mir-520b		0
CA Bladder Dyrskjot	49					hsa-mir-432		0
CA Bladder Dyrskjot	46					hsa-mir-342-5p		0
CA Bladder Dyrskjot	47			hsa-mir-331-5p		hsa-mir-197		0
CA Bladder Dyrskjot	42			hsa-mir-1183		hsa-mir-362-5p		0
CA Bladder Dyrskjot	28					hsa-mir-296-5p		0
CA Bladder Dyrskjot	43					hsa-mir-939		0
CA Bladder Dyrskjot	40					hsa-mir-548d-3p		0
CA Bladder Dyrskjot	1			hsa-mir-940		hsa-mir-637		0
CA Bladder Dyrskjot	0			hsa-mir-607		hsa-mir-643		0
CA Renal Higgins	10			hsa-mir-875-3p		hsa-mir-483-3p		0
CA Renal Higgins	13			hsa-mir-423-5p		hsa-mir-663b hsa-mir-663		0
CA Bladder Dyrskjot	7					hsa-mir-361-5p		0
CA Bladder Dyrskjot	6					hsa-mir-939		0
CA Renal Higgins	14			hsa-mir-140-5p		hsa-mir-549		0
CA Bladder Dyrskjot	8			hsa-mir-140-3p		hsa-mir-331-5p		0
CA Bladder Dyrskjot	68					hsa-mir-550b hsa-mir-550a		0
CA Bladder Dyrskjot	79			hsa-mir-147 hsa-mir-147b		hsa-mir-508-3p		0
RCCC Renal Boer	11					hsa-mir-659		0
CA Bladder Dyrskjot	13	hsa-mir-548k				hsa-mir-548c-3p		0
RCCC Renal Boer	13			hsa-mir-200a hsa-mir-141	Causal	hsa-mir-1279		0
RCCC Renal Boer	12			hsa-mir-760				0
CA Bladder Dyrskjot	75			hsa-mir-487a		hsa-mir-513c hsa-mir-513b hsa-mir-513a-5p		0
RCCC Renal Boer	14			hsa-mir-590-3p				0
CA Bladder Dyrskjot	72					hsa-mir-296-5p		0
CA Bladder Dyrskjot	71			hsa-mir-633		hsa-mir-662		0
RCCC Renal Boer	3			hsa-mir-217				0
CA Bladder Dyrskjot	15					hsa-mir-1323		0
CA Bladder Dyrskjot	32			hsa-mir-320e hsa-mir-320d hsa-mir-320c hsa-mir-320b hsa-mir-320a		hsa-mir-1270		0
RCCC Renal Boer	4			hsa-mir-1262				0
RCCC Renal Boer	7	hsa-mir-32 hsa-mir-92a hsa-mir-92b				hsa-mir-106b	Dysregulated	0
CA Bladder Dyrskjot	10					hsa-mir-597		0
RCCC Renal Boer	9			hsa-mir-1256		hsa-mir-502-3p		0
RCCC Renal Boer	8			hsa-mir-1206				0
CA Bladder Dyrskjot	63					hsa-mir-372		0
CA Bladder Dyrskjot	58					hsa-mir-328		0
CA Bladder Dyrskjot	17	hsa-mir-885-3p						0
CA Bladder Dyrskjot	16			hsa-mir-1205		hsa-mir-939		0
CA Bladder Dyrskjot	19			hsa-mir-659		hsa-mir-331-3p		0
RCCC Renal Lenburg	3	hsa-mir-548f hsa-mir-548e hsa-mir-548x				hsa-mir-888		0
RCCC Renal Lenburg	2	hsa-mir-487b				hsa-mir-499a-5p hsa-mir-499-5p		0
CA Bladder Dyrskjot	23					hsa-mir-211		0
CA Bladder Dyrskjot	37					hsa-mir-548n		0
CA Bladder Dyrskjot	35	hsa-mir-1469				hsa-mir-486-3p		0
RCCC Renal Lenburg	9					hsa-mir-1238		0
RCCC Renal Lenburg	8			hsa-mir-660		hsa-mir-889		0
CA Bladder Dyrskjot	54					hsa-mir-491-5p		0
GCT Seminoma Korkola	25			hsa-mir-105		hsa-mir-607		0
CA Bladder Dyrskjot	31			hsa-mir-520d-5p hsa-mir-524-5p		hsa-mir-656		0
ODGL Brain Sun	0					hsa-mir-637		0
GCT Seminoma Korkola	20			hsa-mir-632		hsa-mir-495		0
GCT Seminoma Korkola	21			hsa-mir-548k		hsa-mir-520f		0
GBM Brain Liang	13					hsa-mir-1278		0
GBM Brain Liang	12			hsa-mir-520g hsa-mir-520h				0
GBM Brain Liang	15			hsa-mir-144				0
GBM Brain Liang	14	hsa-mir-496		hsa-mir-125a-3p				0
GBM Brain Liang	17	hsa-mir-361-5p		hsa-mir-600				0
GCT Seminoma Korkola	4					hsa-mir-376a hsa-mir-376b hsa-mir-376c		0
GBM Brain Liang	18	hsa-mir-369-5p						0
GBM Brain Liang	1					hsa-mir-423-5p		0
GCT Seminoma Korkola	58					hsa-mir-595		0
GBM Brain Liang	2					hsa-mir-548c-3p		0
TU Prostate Lapointe	35			hsa-mir-758		hsa-mir-548am hsa-mir-548ab hsa-mir-548aa hsa-mir-548ag hsa-mir-548ak hsa-mir-548aj hsa-mir-548ai hsa-mir-548ah hsa-mir-548an hsa-mir-548al hsa-mir-548ae hsa-mir-548ad hsa-mir-548a-5p hsa-mir-548ac		0
GCT Seminoma Korkola	56			hsa-mir-499-3p		hsa-mir-548m		0
GBM Brain Liang	7					hsa-mir-323-5p hsa-mir-323b-5p	Dysregulated	0
TU Prostate Lapointe	38			hsa-mir-1264		hsa-mir-633		0
GCT Seminoma Korkola	52					hsa-mir-508-5p		0
GCT Seminoma Korkola	88			hsa-mir-129-5p		hsa-mir-338-5p		0
GCT Seminoma Korkola	89			hsa-mir-568		hsa-mir-1257		0
GCT Seminoma Korkola	111					hsa-mir-296-5p		0
GCT Seminoma Korkola	110			hsa-mir-18a hsa-mir-18b		hsa-mir-1306		0
GCT Seminoma Korkola	112			hsa-mir-590-3p		hsa-mir-548n		0
OD Brain Bredel	19	hsa-mir-551a hsa-mir-551b		hsa-mir-487a				0
OD Brain Bredel	62					hsa-let-7f		0
GCT Seminoma Korkola	80			hsa-mir-623		hsa-mir-573		0
OD Brain Bredel	52			hsa-mir-325		hsa-mir-411	Dysregulated	0
OD Brain Bredel	24			hsa-mir-193a-3p				0
OD Brain Bredel	25			hsa-mir-512-3p				0
GCT Seminoma Korkola	85					hsa-mir-181d hsa-mir-181a hsa-mir-181b hsa-mir-181c		0
GCT Seminoma Korkola	3	hsa-mir-324-5p				hsa-mir-296-5p		0
OD Brain Bredel	21			hsa-mir-369-3p		hsa-mir-548c-3p		0
GCT Seminoma Korkola	109			hsa-mir-548p				0
GCT Seminoma Korkola	102			hsa-mir-125b hsa-mir-125a-5p		hsa-mir-34a		0
GCT Seminoma Korkola	67					hsa-mir-1266		0
GCT Seminoma Korkola	100			hsa-mir-486-3p				0
GCT Seminoma Korkola	101					hsa-mir-372	Causal	0
OD Brain Bredel	45			hsa-mir-324-5p				0
GCT Seminoma Korkola	107			hsa-mir-199b-3p hsa-mir-199a-3p	Causal			0
OD Brain Bredel	43			hsa-mir-412				0
GCT Seminoma Korkola	105			hsa-mir-34a hsa-mir-34c-5p hsa-mir-449a hsa-mir-449b				0
GCT Seminoma Korkola	39			hsa-mir-769-5p		hsa-mir-639		0
GCT Seminoma Korkola	38			hsa-mir-370				0
TU Prostate Lapointe	11					hsa-mir-152		0
OD Brain Bredel	3			hsa-mir-615-3p		hsa-mir-195	Dysregulated	0
GCT Seminoma Korkola	31			hsa-mir-22		hsa-mir-891a		0
OD Brain Bredel	5	hsa-mir-423-3p				hsa-mir-1180		0
GCT Seminoma Korkola	37			hsa-mir-106b hsa-mir-17 hsa-mir-106a hsa-mir-93 hsa-mir-20b hsa-mir-20a		hsa-mir-519a		0
GCT Seminoma Korkola	36			hsa-mir-196b hsa-mir-196a				0
GCT Seminoma Korkola	35					hsa-mir-18a		0
OD Brain Bredel	9			hsa-mir-548e				0
OD Brain Bredel	8			hsa-mir-651				0
OD Brain Bredel	56			hsa-mir-126				0
GCT Seminoma Korkola	62			hsa-mir-548m		hsa-mir-144		0
GCT Seminoma Korkola	63					hsa-mir-889		0
OD Brain Bredel	12			hsa-mir-588		hsa-mir-200a	Causal	0
GCT Seminoma Korkola	66			hsa-mir-532-3p		hsa-mir-1291		0
CA Renal Higgins	20					hsa-mir-1261		0
GCT Seminoma Korkola	68					hsa-mir-1182		0
GCT Seminoma Korkola	69					hsa-mir-296-5p		0
GCT Seminoma Korkola	2					hsa-mir-661		0
GCT Seminoma Korkola	6			hsa-mir-34b		hsa-mir-448		0
GCT Seminoma Korkola	98			hsa-mir-224		hsa-mir-203		0
GCT Seminoma Korkola	90			hsa-mir-362-5p				0
OD Brain Bredel	16	hsa-mir-1181						0
OD Brain Bredel	33			hsa-mir-1231				0
GCT Seminoma Korkola	95			hsa-mir-1283		hsa-mir-548c-3p		0
OD Brain Bredel	57			hsa-mir-148b hsa-mir-152		hsa-mir-423-5p		0
OD Brain Bredel	37	hsa-mir-29a*						0
TU Prostate Lapointe	10					hsa-mir-32	Dysregulated	0
GCT Seminoma Korkola	10					hsa-mir-153		0
GCT Seminoma Korkola	15					hsa-mir-1323		0
GCT Seminoma Korkola	14			hsa-mir-1323 hsa-mir-548o		hsa-mir-340		0
GCT Seminoma Korkola	17					hsa-mir-615-5p		0
GL Brain Bredel	30					hsa-mir-342-5p	Dysregulated	0
GL Brain Bredel	54			hsa-mir-582-3p				0
GL Brain Bredel	37			hsa-mir-544 hsa-mir-544b				0
GCT Seminoma Korkola	48					hsa-mir-455-5p		0
GCT Seminoma Korkola	47			hsa-mir-485-5p				0
GL Brain Bredel	61			hsa-mir-572				0
GCT Seminoma Korkola	45					hsa-mir-183		0
GCT Seminoma Korkola	42	hsa-mir-1181		hsa-mir-149		hsa-mir-637		0
GCT Seminoma Korkola	40			hsa-mir-577		hsa-mir-548n		0
GL Brain Bredel	66	hsa-mir-223	Dysregulated			hsa-mir-27a	Dysregulated	0
GCT Seminoma Korkola	1					hsa-mir-1234		0
CA Renal Higgins	1			hsa-mir-590-3p				0
GCT Seminoma Korkola	9					hsa-mir-296-5p		0
GL Brain Bredel	52					hsa-mir-516a-3p		0
GL Brain Bredel	24	hsa-mir-516b		hsa-mir-1245b-5p hsa-mir-1245				0
GCT Seminoma Korkola	75	hsa-mir-25 hsa-mir-32 hsa-mir-92a hsa-mir-92b hsa-mir-363 hsa-mir-367	Dysregulated	hsa-mir-664		hsa-mir-708		0
GCT Seminoma Korkola	74			hsa-let-7f hsa-let-7g hsa-let-7a hsa-let-7b hsa-let-7d hsa-let-7i hsa-mir-98 hsa-let-7c hsa-let-7e				0
GL Brain Bredel	27					hsa-mir-181d hsa-mir-181a hsa-mir-181b hsa-mir-181c	Dysregulated	0
GL Brain Bredel	20			hsa-mir-487b	Dysregulated			0
GL Brain Bredel	21			hsa-mir-633				0
GL Brain Bredel	48	hsa-mir-2277-5p						0
GCT Seminoma Korkola	0					hsa-mir-1251		0
GL Brain Bredel	46			hsa-mir-154		hsa-mir-548l		0
CA Renal Higgins	3					hsa-mir-199a-3p	Causal	0
GL Brain Bredel	40			hsa-mir-526b				0
GL Brain Bredel	41			hsa-mir-484				0
GL Brain Bredel	0			hsa-mir-1208		hsa-mir-548i		0
GL Brain Bredel	9			hsa-mir-549				0
GL Brain Bredel	78	hsa-mir-126				hsa-mir-424	Dysregulated	0
CA Renal Higgins	4					hsa-mir-34b		0
GL Brain Bredel	33			hsa-mir-625				0
GL Brain Bredel	39			hsa-mir-363		hsa-mir-572		0
GL Brain Bredel	77					hsa-mir-744		0
GL Brain Bredel	75			hsa-mir-889				0
GL Brain Bredel	72					hsa-mir-760		0
GL Brain Bredel	71			hsa-mir-651				0
GL Brain Bredel	59			hsa-mir-125a-3p				0
GL Brain Bredel	38					hsa-mir-486-3p		0
GL Brain Bredel	79					hsa-mir-340		0
GL Brain Bredel	11			hsa-mir-542-3p				0
CA Breast Richardson	43			hsa-mir-1246				0
GL Brain Bredel	12			hsa-mir-384				0
GL Brain Bredel	15	hsa-mir-126		hsa-mir-654-3p				0
GL Brain Bredel	17					hsa-mir-877		0
GL Brain Bredel	32					hsa-mir-15a	Dysregulated	0
GL Brain Bredel	31					hsa-mir-615-3p		0
GL Brain Bredel	36			hsa-mir-661				0
GL Brain Bredel	18	hsa-mir-187						0
GL Brain Bredel	57			hsa-mir-769-3p hsa-mir-450b-3p		hsa-mir-193a-3p		0
GL Brain Bredel	65			hsa-mir-532-5p				0
AO Brain Bredel	20			hsa-mir-324-5p				0
AO Brain Bredel	21					hsa-mir-1203		0
AO Brain Bredel	22					hsa-mir-663b hsa-mir-663		0
AO Brain Bredel	28					hsa-mir-296-5p	Causal	0
GCT Seminoma Korkola	83					hsa-mir-1254		0
AO Brain Bredel	1					hsa-mir-181a	Causal	0
AO Brain Bredel	0					hsa-mir-635		0
GBM Brain Liang	5					hsa-mir-939		0
AO Brain Bredel	38					hsa-mir-1282		0
AO Brain Bredel	11			hsa-mir-608				0
AO Brain Bredel	10	hsa-mir-4285						0
AO Brain Bredel	13			hsa-mir-506				0
AO Brain Bredel	17			hsa-mir-191				0
CA Renal Higgins	17					hsa-mir-663b hsa-mir-663		0
AO Brain Bredel	18					hsa-mir-497		0
AO Brain Bredel	30			hsa-mir-1255b hsa-mir-1255a				0
AO Brain Bredel	35			hsa-mir-939				0
AO Brain Bredel	33			hsa-mir-450b-5p				0
AO Brain Bredel	32					hsa-mir-564		0
GL Brain Rickman	26	hsa-mir-1469						0
GL Brain Rickman	27					hsa-mir-182		0
GL Brain Rickman	21			hsa-mir-624		hsa-mir-495		0
GL Brain Rickman	22			hsa-mir-542-3p		hsa-mir-374b		0
GL Brain Rickman	23			hsa-mir-490-5p		hsa-mir-935		0
GL Brain Rickman	29			hsa-mir-544 hsa-mir-544b		hsa-mir-568		0
GL Brain Rickman	1			hsa-mir-493		hsa-mir-1283		0
GL Brain Rickman	3					hsa-mir-182		0
GL Brain Rickman	2	hsa-mir-718						0
GL Brain Rickman	4			hsa-mir-302f		hsa-mir-361-5p		0
GL Brain Rickman	8					hsa-mir-634		0
GL Brain Rickman	11			hsa-mir-653				0
GL Brain Rickman	10					hsa-mir-648		0
GL Brain Rickman	13			hsa-mir-486-3p				0
GL Brain Rickman	15					hsa-mir-487a		0
GL Brain Rickman	14			hsa-mir-149	Dysregulated			0
GL Brain Rickman	17					hsa-mir-146b-3p		0
GL Brain Rickman	16					hsa-mir-586		0
GL Brain Rickman	31			hsa-let-7e hsa-let-7f hsa-let-7g hsa-let-7a hsa-let-7b hsa-let-7d hsa-let-7i hsa-mir-98 hsa-let-7c	Dysregulated			0
GL Brain Rickman	34			hsa-mir-125a-3p				0
GL Brain Rickman	32					hsa-mir-889		0
ODGL Brain Sun	30					hsa-mir-483-5p		0
RCCC Renal Boer	15			hsa-mir-548k		hsa-mir-300		0
ODGL Brain Sun	22					hsa-mir-423-5p		0
ODGL Brain Sun	29					hsa-mir-509-3p hsa-mir-509-3-5p		0
ODGL Brain Sun	60			hsa-mir-556-3p		hsa-let-7d		0
ODGL Brain Sun	61					hsa-mir-142-5p		0
ODGL Brain Sun	62					hsa-mir-1294		0
ODGL Brain Sun	63					hsa-mir-410	Dysregulated	0
ODGL Brain Sun	64			hsa-mir-539				0
ODGL Brain Sun	53			hsa-mir-548m		hsa-mir-548n		0
ODGL Brain Sun	52			hsa-mir-1270 hsa-mir-620				0
ODGL Brain Sun	23					hsa-mir-1225-5p		0
ODGL Brain Sun	25			hsa-mir-548p		hsa-mir-548l		0
ODGL Brain Sun	26			hsa-mir-622				0
ODGL Brain Sun	27					hsa-mir-136	Dysregulated	0
ODGL Brain Sun	20			hsa-mir-570		hsa-mir-548e		0
RCCC Renal Boer	1					hsa-mir-371b-5p hsa-mir-371-5p		0
ODGL Brain Sun	48					hsa-mir-384		0
ODGL Brain Sun	49					hsa-mir-423-5p		0
ODGL Brain Sun	47					hsa-mir-1204		0
ODGL Brain Sun	44			hsa-mir-1276				0
RCCC Renal Boer	0			hsa-mir-140-3p		hsa-mir-494	Dysregulated	0
ODGL Brain Sun	28					hsa-mir-219-2-3p		0
ODGL Brain Sun	41			hsa-mir-374b hsa-mir-374a		hsa-mir-26b		0
ODGL Brain Sun	1					hsa-mir-647		0
CA Bladder Dyrskjot	70					hsa-mir-502-5p		0
ODGL Brain Sun	3					hsa-mir-889		0
ODGL Brain Sun	2					hsa-mir-939		0
ODGL Brain Sun	7					hsa-mir-548k		0
ODGL Brain Sun	9			hsa-mir-142-3p	Dysregulated	hsa-mir-186		0
ODGL Brain Sun	50			hsa-mir-548c-3p		hsa-mir-217		0
ODGL Brain Sun	58			hsa-mir-181d hsa-mir-181b	Causal	hsa-mir-889		0
ODGL Brain Sun	11					hsa-mir-219-1-3p		0
ODGL Brain Sun	10					hsa-mir-208a		0
ODGL Brain Sun	39			hsa-mir-218	Dysregulated	hsa-mir-1283		0
ODGL Brain Sun	38	hsa-mir-1469						0
ODGL Brain Sun	17					hsa-mir-548l		0
ODGL Brain Sun	33			hsa-mir-335				0
ODGL Brain Sun	57					hsa-mir-296-5p	Causal	0
ODGL Brain Sun	36			hsa-mir-361-3p				0
ODGL Brain Sun	37	hsa-mir-126						0
ODGL Brain Sun	32					hsa-mir-153		0
ODGL Brain Sun	31			hsa-mir-490-3p				0
ODGL Brain Sun	65			hsa-mir-340		hsa-mir-495		0
AC Brain Sun	51			hsa-mir-922				0
AC Brain Sun	34					hsa-mir-223	Dysregulated	0
CA Bladder Dyrskjot	38					hsa-mir-1281		0
AC Brain Sun	27					hsa-mir-612		0
AC Brain Sun	23					hsa-mir-1207-3p		0
AC Brain Sun	46			hsa-mir-548c-3p		hsa-mir-590-3p		0
AC Brain Sun	44					hsa-mir-939		0
OD Brain Bredel	54					hsa-mir-1275		0
RCCC Renal Lenburg	10					hsa-mir-1273 hsa-mir-1273c hsa-mir-1273d hsa-mir-1273e hsa-mir-1273f hsa-mir-1273g		0
AC Brain Sun	1					hsa-mir-642a hsa-mir-642b		0
AC Brain Sun	3					hsa-mir-1205		0
AC Brain Sun	2					hsa-mir-548c-3p		0
AC Brain Sun	5	hsa-mir-523				hsa-mir-637		0
AC Brain Sun	4	hsa-mir-937		hsa-mir-222	Causal	hsa-mir-371-3p		0
AC Brain Sun	7			hsa-mir-582-3p		hsa-mir-548l		0
AC Brain Sun	6			hsa-mir-1284		hsa-mir-139-5p	Dysregulated	0
AC Brain Sun	8					hsa-mir-196a		0
AC Brain Sun	28					hsa-mir-539		0
AC Brain Sun	12			hsa-mir-485-3p	Dysregulated	hsa-mir-210	Dysregulated	0
AC Brain Sun	11					hsa-mir-574-3p		0
CA Bladder Dyrskjot	66			hsa-mir-1827				0
AC Brain Sun	39			hsa-mir-1266				0
AC Brain Sun	22					hsa-mir-185		0
AC Brain Sun	17	hsa-mir-487b	Dysregulated			hsa-mir-617		0
AC Brain Sun	16					hsa-mir-655		0
AC Brain Sun	19			hsa-mir-218	Dysregulated	hsa-mir-485-5p		0
AC Brain Sun	18					hsa-mir-1305		0
AC Brain Sun	31					hsa-mir-1280		0
AC Brain Sun	37					hsa-mir-569		0
AC Brain Sun	32			hsa-mir-1266				0
AC Brain Sun	50	hsa-mir-1234		hsa-mir-32		hsa-mir-483-3p		0
GLB Brain Sun	58					hsa-mir-1287		0
RCCC Renal Lenburg	5					hsa-mir-515-3p		0
GLB Brain Sun	36					hsa-mir-423-5p		0
GLB Brain Sun	54			hsa-mir-548m		hsa-mir-921		0
GLB Brain Sun	51			hsa-mir-28-3p				0
GLB Brain Sun	43			hsa-mir-331-5p				0
GLB Brain Sun	60					hsa-mir-548f		0
GLB Brain Sun	62			hsa-mir-216a		hsa-mir-495		0
GLB Brain Sun	63					hsa-mir-939		0
GLB Brain Sun	64	hsa-let-7e*						0
GLB Brain Sun	68			hsa-mir-888		hsa-mir-299-5p	Dysregulated	0
GLB Brain Sun	69			hsa-mir-1288				0
RCCC Renal Lenburg	6			hsa-mir-651				0
GLB Brain Sun	24			hsa-mir-381 hsa-mir-300	Dysregulated	hsa-mir-494		0
GLB Brain Sun	25					hsa-mir-600		0
GLB Brain Sun	27			hsa-mir-590-3p		hsa-mir-889		0
GLB Brain Sun	20			hsa-mir-556-3p		hsa-mir-331-5p		0
GLB Brain Sun	21			hsa-mir-188-5p				0
GLB Brain Sun	49					hsa-mir-340		0
GLB Brain Sun	42					hsa-mir-602		0
GLB Brain Sun	28			hsa-mir-369-3p		hsa-mir-323-3p		0
GLB Brain Sun	29	hsa-mir-1181				hsa-mir-1275		0
GLB Brain Sun	41			hsa-mir-760				0
GLB Brain Sun	1			hsa-mir-767-5p		hsa-mir-324-5p		0
GLB Brain Sun	0					hsa-mir-637		0
GLB Brain Sun	3					hsa-mir-320a		0
GLB Brain Sun	5					hsa-mir-515-5p		0
GLB Brain Sun	4					hsa-mir-542-5p		0
CA Bladder Dyrskjot	12			hsa-mir-607		hsa-mir-1244		0
GLB Brain Sun	8			hsa-mir-140-3p		hsa-mir-501-5p		0
GLB Brain Sun	13					hsa-mir-744		0
GCT Seminoma Korkola	26			hsa-mir-138		hsa-mir-374a		0
GLB Brain Sun	12			hsa-mir-924				0
GLB Brain Sun	73					hsa-mir-187		0
GLB Brain Sun	72			hsa-mir-571		hsa-mir-1294		0
GLB Brain Sun	71			hsa-mir-1182				0
CA Bladder Dyrskjot	65					hsa-mir-888		0
GLB Brain Sun	59					hsa-mir-1252		0
GLB Brain Sun	10			hsa-mir-588		hsa-mir-409-5p		0
GLB Brain Sun	15			hsa-mir-582-3p		hsa-mir-219-1-3p		0
GLB Brain Sun	14			hsa-mir-1299				0
GLB Brain Sun	17			hsa-mir-621				0
GLB Brain Sun	31			hsa-mir-936		hsa-mir-501-3p		0
GLB Brain Sun	37					hsa-mir-1256		0
GLB Brain Sun	50			hsa-mir-664		hsa-mir-548c-3p		0
GLB Brain Sun	35					hsa-mir-922		0
CA Colon Graudens	15					hsa-mir-140-5p	Causal	0
GLB Brain Sun	55					hsa-mir-32		0
GLB Brain Sun	74					hsa-mir-369-3p		0
GLB Brain Sun	18			hsa-mir-655		hsa-mir-498		0
GLB Brain Sun	57					hsa-mir-921		0
CA Breast Sorlie	24	hsa-mir-1538						0
CA Breast Sorlie	20			hsa-mir-1279		hsa-mir-590-3p		0
GCT Seminoma Korkola	28					hsa-mir-146a		0
CA Breast Sorlie	2			hsa-mir-653				0
CA Breast Sorlie	4					hsa-mir-611		0
CA Breast Sorlie	8			hsa-mir-494		hsa-mir-1255a		0
CA Breast Sorlie	11			hsa-mir-33a				0
CA Breast Sorlie	10			hsa-mir-23b hsa-mir-23a				0
CA Breast Sorlie	12			hsa-mir-548c-3p				0
CA Breast Sorlie	14			hsa-mir-632				0
CA Breast Sorlie	17					hsa-mir-640		0
CA Breast Sorlie	16					hsa-mir-579		0
CA Breast Sorlie	19			hsa-mir-155	Causal	hsa-mir-129-5p		0
CA Breast Sorlie	18			hsa-mir-490-3p				0
GCT Seminoma Korkola	34					hsa-mir-136		0
GCT Seminoma Korkola	8			hsa-mir-940				0
CA Breast Richardson	61					hsa-mir-1271		0
CA Breast Richardson	62					hsa-mir-622		0
CA Breast Richardson	63					hsa-mir-561		0
CA Breast Richardson	53			hsa-mir-548m		hsa-mir-486-5p		0
CA Breast Richardson	67					hsa-mir-889		0
CA Breast Richardson	68					hsa-mir-663b hsa-mir-663	Dysregulated	0
CA Breast Richardson	34			hsa-mir-410		hsa-mir-186		0
CA Breast Richardson	25					hsa-mir-1252		0
CA Breast Richardson	27					hsa-mir-663b hsa-mir-663	Dysregulated	0
CA Breast Richardson	46	hsa-mir-487b		hsa-mir-323-3p		hsa-mir-607		0
CA Breast Richardson	45			hsa-mir-181d hsa-mir-181b	Dysregulated	hsa-mir-513a-3p		0
CA Breast Richardson	29					hsa-mir-1302		0
CA Breast Richardson	3					hsa-mir-578		0
CA Breast Richardson	4			hsa-mir-433				0
CA Breast Richardson	28					hsa-mir-765		0
CA Breast Richardson	56			hsa-mir-146b-5p hsa-mir-146a	Causal	hsa-mir-34b		0
CA Breast Richardson	7					hsa-mir-590-3p		0
CA Breast Richardson	33			hsa-mir-876-5p		hsa-mir-1251		0
CA Breast Richardson	38			hsa-mir-1271		hsa-mir-103b hsa-mir-103a		0
CA Breast Richardson	15	hsa-let-7d*				hsa-mir-494		0
CA Breast Richardson	32			hsa-mir-1245b-5p hsa-mir-1245				0
CA Breast Richardson	58					hsa-mir-889		0
CA Breast Richardson	13			hsa-mir-590-3p				0
CA Breast Richardson	59					hsa-mir-608		0
CA Breast Richardson	17	hsa-mir-566				hsa-mir-423-5p		0
CA Breast Richardson	16					hsa-mir-18a	Dysregulated	0
CA Breast Richardson	19					hsa-mir-586		0
CA Breast Richardson	18					hsa-mir-135a		0
CA Breast Richardson	23					hsa-mir-544 hsa-mir-544b		0
CA Breast Richardson	51					hsa-mir-633		0
CA Breast Richardson	50					hsa-mir-380		0
CA Breast Richardson	55			hsa-mir-130b hsa-mir-301a hsa-mir-301b hsa-mir-130a hsa-mir-454		hsa-mir-544 hsa-mir-544b		0
CA Breast Richardson	54					hsa-mir-361-3p		0
CA Breast Richardson	31					hsa-mir-376a		0
CA Breast Richardson	65					hsa-mir-1254		0
OD Brain Bredel	30					hsa-mir-1306		0
MCA Breast Radvanyi	21			hsa-mir-626				0
MCA Breast Radvanyi	2					hsa-mir-204	Causal	0
MCA Breast Radvanyi	7			hsa-mir-595		hsa-mir-324-3p		0
COID Lung Bhattacharjee	71			hsa-mir-1237				0
MCA Breast Radvanyi	12			hsa-mir-489				0
OD Brain Bredel	36					hsa-mir-326		0
MCA Breast Radvanyi	17					hsa-mir-219-5p		0
MCA Breast Radvanyi	19					hsa-mir-210	Causal	0
MCA Breast Radvanyi	18					hsa-mir-663b hsa-mir-663	Dysregulated	0
ILC Breast Radvanyi	24					hsa-mir-340		0
ILC Breast Radvanyi	26					hsa-mir-486-3p		0
ILC Breast Radvanyi	20					hsa-mir-328	Dysregulated	0
ILC Breast Radvanyi	22			hsa-mir-508-3p				0
GCT Seminoma Korkola	82					hsa-mir-576-5p		0
ILC Breast Radvanyi	3					hsa-mir-383		0
ILC Breast Radvanyi	2					hsa-mir-423-3p		0
ILC Breast Radvanyi	5			hsa-mir-501-5p				0
ILC Breast Radvanyi	4			hsa-mir-122	Dysregulated	hsa-mir-548a-3p		0
MM Myeloma Zhan	14					hsa-mir-548l		0
ILC Breast Radvanyi	6	hsa-let-7d*				hsa-mir-579		0
ILC Breast Radvanyi	11	hsa-mir-483-5p						0
ILC Breast Radvanyi	10					hsa-mir-548c-3p		0
ILC Breast Radvanyi	15					hsa-mir-518b		0
ILC Breast Radvanyi	19			hsa-mir-663b hsa-mir-663	Dysregulated	hsa-mir-338-3p		0
IDC Breast Radvanyi	56			hsa-mir-216b		hsa-mir-576-5p		0
IDC Breast Radvanyi	54			hsa-mir-1277				0
IDC Breast Radvanyi	48			hsa-mir-630				0
IDC Breast Radvanyi	43					hsa-mir-1224-5p		0
GCT Seminoma Korkola	87			hsa-mir-1179		hsa-mir-371b-5p hsa-mir-371-5p	Dysregulated	0
IDC Breast Radvanyi	63					hsa-mir-548h		0
IDC Breast Radvanyi	65					hsa-mir-802		0
CA Bladder Dyrskjot	80					hsa-mir-616		0
IDC Breast Radvanyi	42					hsa-mir-766		0
IDC Breast Radvanyi	24					hsa-mir-1291		0
IDC Breast Radvanyi	23	hsa-mir-376a*						0
IDC Breast Radvanyi	27					hsa-mir-323-5p hsa-mir-323b-5p		0
GBM Brain Liang	16					hsa-mir-663b hsa-mir-663		0
IDC Breast Radvanyi	21			hsa-mir-493				0
GCT Seminoma Korkola	29					hsa-mir-548c-3p		0
IDC Breast Radvanyi	47			hsa-mir-760				0
IDC Breast Radvanyi	44			hsa-mir-548a-3p				0
IDC Breast Radvanyi	28					hsa-mir-149	Dysregulated	0
IDC Breast Radvanyi	41			hsa-mir-361-3p		hsa-mir-939		0
IDC Breast Radvanyi	2					hsa-mir-513a-3p		0
IDC Breast Radvanyi	4			hsa-mir-661	Causal	hsa-mir-608		0
IDC Breast Radvanyi	7					hsa-mir-450b-3p		0
GCT Seminoma Korkola	108			hsa-mir-570		hsa-mir-590-5p		0
IDC Breast Radvanyi	9					hsa-mir-661	Causal	0
IDC Breast Radvanyi	8	hsa-mir-604		hsa-mir-1273 hsa-mir-1273c hsa-mir-1273d hsa-mir-1273e hsa-mir-1273f hsa-mir-1273g		hsa-mir-631		0
IDC Breast Radvanyi	15			hsa-mir-182	Causal	hsa-mir-205	Causal	0
IDC Breast Radvanyi	14	hsa-mir-590-3p		hsa-mir-556-5p		hsa-mir-323-3p		0
IDC Breast Radvanyi	39					hsa-mir-125a-3p		0
IDC Breast Radvanyi	12					hsa-mir-590-3p		0
IDC Breast Radvanyi	59	hsa-mir-1469						0
IDC Breast Radvanyi	16			hsa-mir-9	Causal			0
IDC Breast Radvanyi	51			hsa-mir-548l		hsa-mir-548n		0
IDC Breast Radvanyi	35			hsa-mir-488				0
IDC Breast Radvanyi	34			hsa-mir-532-5p				0
OD Brain Bredel	47					hsa-mir-219-1-3p		0
IDC Breast Radvanyi	18					hsa-mir-1207-3p		0
IDC Breast Radvanyi	50	hsa-mir-1247						0
CA Colon Graudens	28			hsa-mir-566		hsa-mir-508-5p		0
CA Colon Graudens	29			hsa-mir-337-3p				0
CA Colon Graudens	24			hsa-mir-381 hsa-mir-300		hsa-mir-522		0
CA Colon Graudens	25			hsa-mir-202				0
GCT Seminoma Korkola	106					hsa-mir-513b		0
CA Colon Graudens	40			hsa-mir-507 hsa-mir-557		hsa-mir-369-3p		0
CA Colon Graudens	41			hsa-mir-1243				0
CA Colon Graudens	0					hsa-mir-138		0
CA Colon Graudens	3			hsa-mir-552				0
CA Colon Graudens	2			hsa-mir-551b hsa-mir-551a		hsa-mir-451b hsa-mir-451	Causal	0
GCT Seminoma Korkola	104					hsa-mir-557		0
CA Colon Graudens	4					hsa-mir-144		0
CA Colon Graudens	6					hsa-mir-658		0
CA Colon Graudens	9			hsa-mir-338-3p				0
CA Colon Graudens	8			hsa-mir-595				0
CA Colon Graudens	39			hsa-mir-873				0
CA Colon Graudens	11	hsa-mir-523						0
CA Colon Graudens	10					hsa-mir-1225-5p		0
CA Colon Graudens	38			hsa-mir-320e hsa-mir-320d hsa-mir-320c hsa-mir-320b hsa-mir-320a	Dysregulated	hsa-mir-96	Dysregulated	0
OD Brain Bredel	41			hsa-mir-1276				0
CA Colon Graudens	14			hsa-mir-1244				0
CA Colon Graudens	17			hsa-mir-642a hsa-mir-642b		hsa-mir-597		0
RCCC Renal Lenburg	0					hsa-mir-489	Dysregulated	0
CA Colon Graudens	32					hsa-mir-296-5p	Dysregulated	0
CA Colon Graudens	31					hsa-mir-548o		0
CA Colon Graudens	30			hsa-mir-125b hsa-mir-125a-5p	Dysregulated			0
CA Colon Graudens	37					hsa-mir-32	Dysregulated	0
CA Colon Graudens	36			hsa-mir-576-5p		hsa-mir-512-3p		0
CA Colon Graudens	35			hsa-mir-325				0
CA Colon Graudens	19			hsa-mir-148a				0
HSCC Head-Neck Cromer	25			hsa-mir-1264		hsa-mir-495		0
HSCC Head-Neck Cromer	26			hsa-mir-199a-5p hsa-mir-199b-5p	Dysregulated	hsa-mir-885-5p		0
HSCC Head-Neck Cromer	27					hsa-mir-615-5p		0
HSCC Head-Neck Cromer	20			hsa-mir-543		hsa-mir-567		0
HSCC Head-Neck Cromer	22			hsa-mir-218		hsa-mir-30b	Dysregulated	0
HSCC Head-Neck Cromer	23			hsa-mir-380				0
HSCC Head-Neck Cromer	3			hsa-mir-496				0
HSCC Head-Neck Cromer	2					hsa-mir-374b	Dysregulated	0
HSCC Head-Neck Cromer	5					hsa-mir-486-3p		0
HSCC Head-Neck Cromer	4					hsa-mir-662		0
GCT Seminoma Korkola	30					hsa-mir-588		0
HSCC Head-Neck Cromer	6					hsa-mir-1275		0
HSCC Head-Neck Cromer	8					hsa-mir-142-5p		0
HSCC Head-Neck Cromer	11			hsa-mir-129-5p				0
HSCC Head-Neck Cromer	10					hsa-mir-520a-5p		0
HSCC Head-Neck Cromer	13			hsa-mir-875-3p		hsa-mir-622		0
HSCC Head-Neck Cromer	12			hsa-mir-1297 hsa-mir-26a hsa-mir-26b	Dysregulated	hsa-mir-513a-3p		0
MM Myeloma Zhan	10					hsa-mir-1305		0
OD Brain Bredel	7					hsa-mir-23b		0
HSCC Head-Neck Cromer	18			hsa-mir-214	Dysregulated	hsa-mir-615-3p		0
HSCC Head-Neck Chung	10			hsa-mir-1226		hsa-mir-607		0
HSCC Head-Neck Chung	1	hsa-mir-29b hsa-mir-29c hsa-mir-29a	Dysregulated	hsa-mir-767-5p		hsa-mir-450b-5p		0
IDC Breast Radvanyi	6			hsa-mir-652				0
HSCC Head-Neck Chung	3					hsa-mir-1286		0
HSCC Head-Neck Chung	2			hsa-mir-148a hsa-mir-148b hsa-mir-152	Dysregulated	hsa-mir-944		0
HSCC Head-Neck Chung	5					hsa-mir-1202		0
HSCC Head-Neck Chung	4					hsa-mir-548l		0
HSCC Head-Neck Chung	7			hsa-mir-487a		hsa-mir-573		0
HSCC Head-Neck Chung	6					hsa-mir-590-3p		0
HSCC Head-Neck Chung	9					hsa-mir-708		0
HSCC Head-Neck Chung	8					hsa-mir-410		0
B-CLL Leukemia Haslinger	30			hsa-mir-654-3p				0
B-CLL Leukemia Haslinger	28					hsa-mir-376a hsa-mir-376b hsa-mir-376c		0
GCT Seminoma Korkola	60					hsa-mir-551a		0
B-CLL Leukemia Haslinger	36					hsa-mir-587		0
B-CLL Leukemia Haslinger	61					hsa-mir-588		0
B-CLL Leukemia Haslinger	62			hsa-mir-515-5p		hsa-mir-548c-3p		0
B-CLL Leukemia Haslinger	64			hsa-mir-1278				0
B-CLL Leukemia Haslinger	65					hsa-mir-1247		0
B-CLL Leukemia Haslinger	66					hsa-mir-939		0
B-CLL Leukemia Haslinger	68			hsa-mir-377		hsa-mir-520g		0
B-CLL Leukemia Haslinger	69	hsa-mir-450a		hsa-mir-532-5p		hsa-mir-146a	Dysregulated	0
B-CLL Leukemia Haslinger	52			hsa-mir-323-3p		hsa-mir-302a		0
B-CLL Leukemia Haslinger	25			hsa-mir-1237		hsa-mir-548c-3p		0
B-CLL Leukemia Haslinger	27			hsa-mir-760				0
B-CLL Leukemia Haslinger	21			hsa-mir-429 hsa-mir-200b hsa-mir-200c hsa-mir-200a	Causal	hsa-mir-548c-3p		0
B-CLL Leukemia Haslinger	48			hsa-mir-520d-5p hsa-mir-524-5p				0
B-CLL Leukemia Haslinger	23					hsa-mir-548o		0
B-CLL Leukemia Haslinger	46			hsa-mir-1249		hsa-mir-1247		0
B-CLL Leukemia Haslinger	44					hsa-mir-200b	Causal	0
B-CLL Leukemia Haslinger	45					hsa-mir-889		0
B-CLL Leukemia Haslinger	29			hsa-mir-520f		hsa-mir-1270		0
B-CLL Leukemia Haslinger	40			hsa-mir-582-3p				0
B-CLL Leukemia Haslinger	41					hsa-mir-483-5p		0
B-CLL Leukemia Haslinger	1					hsa-mir-487a		0
B-CLL Leukemia Haslinger	0					hsa-mir-409-5p		0
B-CLL Leukemia Haslinger	5					hsa-mir-622		0
B-CLL Leukemia Haslinger	9					hsa-mir-1245b-5p hsa-mir-1245		0
B-CLL Leukemia Haslinger	8					hsa-mir-939		0
B-CLL Leukemia Haslinger	56					hsa-mir-548b-3p		0
B-CLL Leukemia Haslinger	43					hsa-mir-483-3p		0
B-CLL Leukemia Haslinger	35			hsa-mir-1294		hsa-mir-486-3p		0
END Ovarian Hendrix	77					hsa-mir-590-3p		0
B-CLL Leukemia Haslinger	15			hsa-mir-338-5p		hsa-mir-654-3p		0
B-CLL Leukemia Haslinger	58	hsa-mir-337-5p						0
B-CLL Leukemia Haslinger	11					hsa-mir-34c-3p		0
B-CLL Leukemia Haslinger	10					hsa-mir-454		0
B-CLL Leukemia Haslinger	13					hsa-mir-892b		0
B-CLL Leukemia Haslinger	38					hsa-mir-548g		0
B-CLL Leukemia Haslinger	59			hsa-mir-636		hsa-mir-1228		0
B-CLL Leukemia Haslinger	17					hsa-mir-590-3p		0
B-CLL Leukemia Haslinger	16					hsa-mir-1285		0
B-CLL Leukemia Haslinger	54	hsa-mir-937				hsa-mir-1321		0
B-CLL Leukemia Haslinger	49			hsa-mir-660		hsa-mir-1227		0
B-CLL Leukemia Haslinger	51					hsa-mir-448		0
B-CLL Leukemia Haslinger	50					hsa-mir-296-5p		0
B-CLL Leukemia Haslinger	34			hsa-mir-492				0
B-CLL Leukemia Haslinger	55			hsa-mir-1323 hsa-mir-548o		hsa-mir-200b	Causal	0
B-CLL Leukemia Haslinger	37			hsa-mir-545		hsa-mir-323-3p		0
B-CLL Leukemia Haslinger	31					hsa-mir-1321		0
AD Lung Beer	51			hsa-mir-1202				0
AD Lung Beer	22					hsa-mir-525-5p		0
AD Lung Beer	34			hsa-mir-193b		hsa-mir-646		0
AD Lung Beer	53			hsa-mir-581		hsa-mir-548d-3p		0
AD Lung Beer	24			hsa-mir-770-5p				0
OD Brain Bredel	15					hsa-mir-765		0
AD Lung Beer	27			hsa-mir-320e hsa-mir-320d hsa-mir-320c hsa-mir-320b hsa-mir-320a				0
GLB Brain Sun	76			hsa-mir-561		hsa-mir-139-5p	Dysregulated	0
AD Lung Beer	46			hsa-mir-874		hsa-mir-606		0
AD Lung Beer	44			hsa-mir-484		hsa-mir-452		0
AD Lung Beer	42					hsa-mir-651		0
AD Lung Beer	43					hsa-mir-1275		0
AD Lung Beer	40			hsa-mir-320e hsa-mir-320d hsa-mir-320c hsa-mir-320b hsa-mir-320a		hsa-mir-561		0
AD Lung Beer	1			hsa-mir-766				0
AD Lung Beer	0					hsa-let-7d	Causal	0
AD Lung Beer	3			hsa-mir-338-5p	Dysregulated			0
GCT Seminoma Korkola	93			hsa-mir-193a-5p		hsa-mir-640		0
AD Lung Beer	5					hsa-mir-1292		0
AD Lung Beer	4					hsa-mir-1183		0
AD Lung Beer	7			hsa-mir-548b-5p hsa-mir-548am hsa-mir-548ab hsa-mir-548aa hsa-mir-548ag hsa-mir-548ak hsa-mir-548aj hsa-mir-548ai hsa-mir-548ah hsa-mir-548an hsa-mir-548al hsa-mir-548ae hsa-mir-548ad hsa-mir-548a-5p hsa-mir-548ac hsa-mir-548d-5p hsa-mir-548i hsa-mir-548j hsa-mir-548c-5p hsa-mir-548h				0
AD Lung Beer	6					hsa-mir-548c-3p		0
AD Lung Beer	8			hsa-mir-939		hsa-mir-637		0
AD Lung Beer	28			hsa-mir-147 hsa-mir-147b		hsa-mir-1245b-5p hsa-mir-1245		0
AD Lung Beer	38					hsa-mir-933		0
AD Lung Beer	29			hsa-mir-661				0
AD Lung Beer	11			hsa-mir-9	Dysregulated			0
OD Brain Bredel	18			hsa-mir-1261				0
AD Lung Beer	12			hsa-mir-1208		hsa-mir-378b hsa-mir-378c hsa-mir-378f hsa-mir-378g hsa-mir-378d hsa-mir-378e hsa-mir-378h hsa-mir-378i hsa-mir-378		0
AD Lung Beer	15					hsa-mir-586		0
AD Lung Beer	14			hsa-mir-571		hsa-mir-542-5p		0
AD Lung Beer	32			hsa-mir-656				0
MUC Ovarian Hendrix	35					hsa-mir-340		0
AD Lung Beer	35			hsa-mir-222	Causal			0
AD Lung Beer	52			hsa-mir-372	Causal			0
AD Lung Beer	19	hsa-mir-487b						0
AD Lung Beer	18			hsa-mir-876-3p		hsa-mir-19a	Causal	0
AD Lung Beer	33			hsa-mir-380		hsa-mir-379		0
GCT Seminoma Korkola	96					hsa-mir-29a		0
CA Bladder Dyrskjot	18					hsa-mir-1291		0
AD Lung Bhattacharjee	60			hsa-mir-190b hsa-mir-190		hsa-mir-495		0
AD Lung Bhattacharjee	82					hsa-mir-647		0
AD Lung Bhattacharjee	64	hsa-mir-150	Dysregulated			hsa-mir-765		0
AD Lung Bhattacharjee	65	hsa-mir-3177-5p				hsa-mir-486-3p		0
AD Lung Bhattacharjee	67			hsa-mir-361-5p				0
AD Lung Bhattacharjee	69			hsa-mir-23b hsa-mir-23a		hsa-mir-522		0
AD Lung Bhattacharjee	81					hsa-mir-516b		0
AD Lung Bhattacharjee	24					hsa-mir-608		0
HSCC Head-Neck Cromer	19					hsa-mir-548l		0
AD Lung Bhattacharjee	27	hsa-mir-487b				hsa-mir-451b hsa-mir-451	Dysregulated	0
AD Lung Bhattacharjee	20			hsa-mir-599		hsa-mir-1245b-5p hsa-mir-1245		0
AD Lung Bhattacharjee	22			hsa-mir-875-3p		hsa-mir-619		0
AD Lung Bhattacharjee	46			hsa-mir-548a-3p hsa-mir-548e hsa-mir-548f		hsa-mir-548c-3p		0
AD Lung Bhattacharjee	47			hsa-mir-409-3p		hsa-mir-1245b-5p hsa-mir-1245		0
AD Lung Bhattacharjee	44	hsa-mir-655		hsa-mir-633		hsa-mir-1284		0
AD Lung Bhattacharjee	45					hsa-mir-340		0
AD Lung Bhattacharjee	42			hsa-mir-760				0
AD Lung Bhattacharjee	41					hsa-mir-296-5p		0
AD Lung Bhattacharjee	0					hsa-mir-338-5p	Dysregulated	0
OD Brain Bredel	61					hsa-mir-937		0
AD Lung Bhattacharjee	2			hsa-mir-645				0
AD Lung Bhattacharjee	4					hsa-mir-1321		0
AD Lung Bhattacharjee	7			hsa-mir-570		hsa-mir-1305		0
AD Lung Bhattacharjee	6	hsa-mir-941				hsa-mir-602		0
AD Lung Bhattacharjee	9					hsa-mir-154		0
AD Lung Bhattacharjee	8					hsa-mir-1324		0
AD Lung Bhattacharjee	52					hsa-let-7a	Causal	0
AD Lung Bhattacharjee	28			hsa-mir-122		hsa-mir-548a-3p		0
AD Lung Bhattacharjee	49			hsa-mir-567				0
GCT Seminoma Korkola	16					hsa-mir-1183		0
AD Lung Bhattacharjee	39			hsa-mir-525-3p hsa-mir-524-3p				0
AD Lung Bhattacharjee	35					hsa-mir-133a		0
AD Lung Bhattacharjee	76			hsa-mir-371-3p				0
AD Lung Bhattacharjee	75			hsa-mir-1270 hsa-mir-620		hsa-mir-637		0
AD Lung Bhattacharjee	74					hsa-mir-543		0
AD Lung Bhattacharjee	72			hsa-mir-507 hsa-mir-557				0
MPC Prostate Dhanasekaran	36					hsa-mir-942		0
AD Lung Bhattacharjee	10					hsa-mir-1321		0
GL Brain Bredel	22					hsa-mir-657		0
AD Lung Bhattacharjee	59			hsa-mir-29b hsa-mir-29c hsa-mir-29a	Causal			0
AD Lung Bhattacharjee	14			hsa-mir-517c hsa-mir-517b hsa-mir-517a		hsa-mir-938		0
AD Lung Bhattacharjee	17					hsa-mir-491-5p		0
GCT Seminoma Korkola	50					hsa-mir-376a hsa-mir-376b hsa-mir-376c		0
AD Lung Bhattacharjee	33			hsa-mir-892a		hsa-mir-490-5p		0
AD Lung Bhattacharjee	30			hsa-mir-607		hsa-mir-548c-3p		0
AD Lung Bhattacharjee	50					hsa-mir-642a hsa-mir-642b		0
AD Lung Bhattacharjee	53			hsa-mir-146b-5p hsa-mir-146a	Dysregulated			0
AD Lung Bhattacharjee	34					hsa-mir-296-5p		0
AD Lung Bhattacharjee	19			hsa-mir-1322		hsa-mir-1247		0
AD Lung Bhattacharjee	55					hsa-mir-1286		0
AD Lung Bhattacharjee	12					hsa-mir-590-3p		0
GL Brain Bredel	60			hsa-mir-513a-5p		hsa-mir-25	Dysregulated	0
COID Lung Bhattacharjee	24					hsa-mir-342-5p		0
COID Lung Bhattacharjee	25			hsa-mir-1276		hsa-mir-361-5p		0
COID Lung Bhattacharjee	20					hsa-mir-615-3p		0
COID Lung Bhattacharjee	21			hsa-mir-590-3p		hsa-mir-944		0
COID Lung Bhattacharjee	23					hsa-mir-1228		0
COID Lung Bhattacharjee	28			hsa-mir-758		hsa-mir-608		0
COID Lung Bhattacharjee	0			hsa-mir-663b hsa-mir-663		hsa-mir-518d-5p		0
COID Lung Bhattacharjee	8			hsa-mir-607		hsa-mir-340		0
COID Lung Bhattacharjee	58					hsa-mir-23a		0
CA Colon Graudens	5					hsa-mir-548h		0
COID Lung Bhattacharjee	51					hsa-mir-656		0
COID Lung Bhattacharjee	52					hsa-mir-154		0
COID Lung Bhattacharjee	89			hsa-mir-1254				0
COID Lung Bhattacharjee	80					hsa-mir-548l		0
COID Lung Bhattacharjee	81			hsa-mir-369-3p				0
COID Lung Bhattacharjee	86			hsa-mir-580		hsa-mir-410		0
COID Lung Bhattacharjee	87	hsa-mir-1181						0
COID Lung Bhattacharjee	84	hsa-mir-615-5p						0
COID Lung Bhattacharjee	85					hsa-mir-1180		0
COID Lung Bhattacharjee	3			hsa-mir-940				0
COID Lung Bhattacharjee	7			hsa-mir-431		hsa-mir-608		0
COID Lung Bhattacharjee	39					hsa-mir-608		0
COID Lung Bhattacharjee	31			hsa-mir-331-3p				0
COID Lung Bhattacharjee	30					hsa-mir-423-5p	Dysregulated	0
CA Bladder Dyrskjot	29					hsa-mir-548c-3p		0
COID Lung Bhattacharjee	36					hsa-mir-890		0
COID Lung Bhattacharjee	60			hsa-mir-505		hsa-mir-516a-3p		0
COID Lung Bhattacharjee	61			hsa-mir-494		hsa-mir-34c-3p		0
GCT Seminoma Korkola	5					hsa-mir-1204		0
COID Lung Bhattacharjee	64					hsa-mir-661		0
COID Lung Bhattacharjee	66					hsa-mir-507		0
COID Lung Bhattacharjee	67			hsa-mir-512-3p		hsa-mir-181d		0
COID Lung Bhattacharjee	68					hsa-mir-1272		0
COID Lung Bhattacharjee	69					hsa-mir-765		0
COID Lung Bhattacharjee	2			hsa-mir-548d-3p				0
COID Lung Bhattacharjee	6					hsa-mir-874		0
COID Lung Bhattacharjee	91			hsa-mir-1275				0
COID Lung Bhattacharjee	92					hsa-mir-920		0
COID Lung Bhattacharjee	11			hsa-mir-501-5p		hsa-mir-513b		0
COID Lung Bhattacharjee	10	hsa-mir-138-2*		hsa-mir-513a-3p		hsa-mir-101	Dysregulated	0
COID Lung Bhattacharjee	12			hsa-mir-509-5p hsa-mir-509-3p hsa-mir-509-3-5p		hsa-mir-494		0
COID Lung Bhattacharjee	14					hsa-mir-557		0
COID Lung Bhattacharjee	17			hsa-mir-885-3p				0
COID Lung Bhattacharjee	16					hsa-mir-376a		0
COID Lung Bhattacharjee	19			hsa-mir-553		hsa-mir-615-5p		0
COID Lung Bhattacharjee	18					hsa-mir-663b hsa-mir-663		0
GL Brain Bredel	25			hsa-mir-338-5p	Dysregulated	hsa-mir-513b		0
COID Lung Bhattacharjee	47			hsa-mir-574-3p				0
COID Lung Bhattacharjee	44			hsa-mir-504				0
COID Lung Bhattacharjee	45					hsa-mir-615-5p		0
COID Lung Bhattacharjee	42					hsa-mir-671-5p		0
COID Lung Bhattacharjee	43					hsa-mir-658		0
COID Lung Bhattacharjee	40			hsa-mir-1181		hsa-mir-93	Causal	0
COID Lung Bhattacharjee	41			hsa-mir-1303				0
COID Lung Bhattacharjee	5			hsa-mir-361-5p		hsa-mir-548o		0
COID Lung Bhattacharjee	9			hsa-mir-622				0
GCT Seminoma Korkola	73					hsa-mir-675		0
COID Lung Bhattacharjee	75					hsa-mir-874		0
COID Lung Bhattacharjee	73			hsa-mir-1262				0
COID Lung Bhattacharjee	72					hsa-mir-548n		0
GCT Seminoma Korkola	72			hsa-mir-490-3p		hsa-mir-760		0
COID Lung Bhattacharjee	79					hsa-mir-508-3p		0
COID Lung Bhattacharjee	78			hsa-mir-920		hsa-mir-27b	Dysregulated	0
SQ Lung Bhattacharjee	41			hsa-mir-885-3p				0
SQ Lung Bhattacharjee	22			hsa-mir-548n		hsa-mir-607		0
SQ Lung Bhattacharjee	35	hsa-mir-449c*						0
SQ Lung Bhattacharjee	34	hsa-mir-718						0
SQ Lung Bhattacharjee	23					hsa-mir-586		0
SQ Lung Bhattacharjee	24					hsa-mir-889		0
GCT Seminoma Korkola	70					hsa-mir-939		0
SQ Lung Bhattacharjee	27					hsa-mir-940		0
SQ Lung Bhattacharjee	21					hsa-mir-455-5p		0
SQ Lung Bhattacharjee	49					hsa-mir-34a	Causal	0
SQ Lung Bhattacharjee	46			hsa-mir-650				0
SQ Lung Bhattacharjee	44	hsa-mir-4285		hsa-mir-767-5p				0
SQ Lung Bhattacharjee	45					hsa-mir-654-5p		0
SQ Lung Bhattacharjee	28			hsa-mir-616				0
SQ Lung Bhattacharjee	29					hsa-mir-486-3p		0
SQ Lung Bhattacharjee	40					hsa-mir-339-3p		0
SQ Lung Bhattacharjee	42			hsa-mir-637				0
SQ Lung Bhattacharjee	0					hsa-mir-662		0
GL Brain Bredel	47					hsa-mir-1236		0
SQ Lung Bhattacharjee	5					hsa-mir-595		0
SQ Lung Bhattacharjee	4			hsa-mir-423-5p	Dysregulated	hsa-mir-214	Dysregulated	0
SQ Lung Bhattacharjee	7					hsa-mir-765		0
SQ Lung Bhattacharjee	9					hsa-mir-891a		0
SQ Lung Bhattacharjee	8	hsa-mir-1203						0
SQ Lung Bhattacharjee	43			hsa-mir-597		hsa-mir-635		0
SQ Lung Bhattacharjee	13					hsa-mir-296-5p		0
SQ Lung Bhattacharjee	15			hsa-mir-96	Dysregulated	hsa-mir-569		0
SQ Lung Bhattacharjee	14					hsa-mir-486-3p		0
SQ Lung Bhattacharjee	16			hsa-mir-802				0
SQ Lung Bhattacharjee	19			hsa-mir-423-5p	Dysregulated	hsa-mir-647		0
SQ Lung Bhattacharjee	18			hsa-mir-767-5p		hsa-mir-410		0
SQ Lung Bhattacharjee	30					hsa-mir-1233		0
SQ Lung Bhattacharjee	37			hsa-mir-770-5p				0
SQ Lung Bhattacharjee	50					hsa-mir-607		0
SQ Lung Bhattacharjee	52			hsa-mir-411				0
SQ Lung Bhattacharjee	33			hsa-mir-339-5p	Dysregulated			0
SQ Lung Bhattacharjee	32			hsa-mir-532-3p		hsa-mir-210	Dysregulated	0
SMCL Lung Bhattacharjee	30			hsa-mir-548n		hsa-mir-655		0
SMCL Lung Bhattacharjee	36					hsa-mir-296-5p		0
SMCL Lung Bhattacharjee	60	hsa-mir-671-3p						0
SMCL Lung Bhattacharjee	61					hsa-mir-331-3p		0
SMCL Lung Bhattacharjee	35					hsa-mir-212	Dysregulated	0
SMCL Lung Bhattacharjee	32					hsa-mir-582-5p		0
MUC Ovarian Hendrix	13					hsa-mir-1280		0
SMCL Lung Bhattacharjee	25			hsa-mir-101	Dysregulated			0
SMCL Lung Bhattacharjee	20					hsa-mir-423-5p	Dysregulated	0
SMCL Lung Bhattacharjee	21			hsa-mir-570				0
SMCL Lung Bhattacharjee	46			hsa-mir-499a-5p hsa-mir-499-5p		hsa-mir-891b		0
SMCL Lung Bhattacharjee	23	hsa-mir-3183						0
SMCL Lung Bhattacharjee	45			hsa-mir-432		hsa-mir-125a-5p	Causal	0
SMCL Lung Bhattacharjee	28					hsa-mir-744		0
SMCL Lung Bhattacharjee	43					hsa-mir-671-3p		0
SMCL Lung Bhattacharjee	41			hsa-mir-512-3p				0
SMCL Lung Bhattacharjee	1			hsa-mir-1237				0
SMCL Lung Bhattacharjee	2			hsa-mir-1266		hsa-mir-940		0
SMCL Lung Bhattacharjee	5					hsa-mir-1321		0
SMCL Lung Bhattacharjee	7					hsa-mir-615-5p		0
SMCL Lung Bhattacharjee	9			hsa-mir-362-3p hsa-mir-329				0
SMCL Lung Bhattacharjee	34			hsa-mir-1207-5p				0
SMCL Lung Bhattacharjee	47					hsa-mir-302e		0
SMCL Lung Bhattacharjee	15			hsa-mir-216b	Dysregulated			0
SMCL Lung Bhattacharjee	29			hsa-mir-513a-3p		hsa-mir-548c-3p		0
SMCL Lung Bhattacharjee	11					hsa-mir-1321		0
SMCL Lung Bhattacharjee	10			hsa-mir-720				0
SMCL Lung Bhattacharjee	59					hsa-mir-340		0
SMCL Lung Bhattacharjee	58					hsa-mir-423-5p	Dysregulated	0
SMCL Lung Bhattacharjee	17			hsa-mir-888				0
SMCL Lung Bhattacharjee	55			hsa-mir-590-3p				0
SMCL Lung Bhattacharjee	57					hsa-mir-448		0
SMCL Lung Bhattacharjee	56			hsa-mir-888				0
SMCL Lung Bhattacharjee	51	hsa-mir-1273 hsa-mir-1273c hsa-mir-1273d hsa-mir-1273e hsa-mir-1273f hsa-mir-1273g						0
SMCL Lung Bhattacharjee	50					hsa-mir-664		0
SMCL Lung Bhattacharjee	53					hsa-mir-20a	Causal	0
SMCL Lung Bhattacharjee	52			hsa-mir-483-3p		hsa-mir-939		0
SMCL Lung Bhattacharjee	16	hsa-mir-339-3p						0
SMCL Lung Bhattacharjee	18			hsa-mir-624		hsa-mir-513c hsa-mir-513b hsa-mir-513a-5p		0
SMCL Lung Bhattacharjee	31					hsa-mir-513a-3p		0
AD Lung Stearman	25			hsa-mir-200a hsa-mir-141	Causal	hsa-mir-519a		0
AD Lung Stearman	27					hsa-mir-300		0
AD Lung Stearman	29	hsa-mir-598				hsa-mir-425	Dysregulated	0
CA Breast Richardson	37					hsa-mir-1289		0
AD Lung Stearman	0			hsa-mir-518a-5p hsa-mir-527		hsa-mir-369-3p		0
AD Lung Stearman	5					hsa-mir-342-3p		0
AD Lung Stearman	7			hsa-mir-1269b hsa-mir-1269		hsa-mir-16	Causal	0
AD Lung Stearman	6					hsa-mir-380		0
AD Lung Stearman	9			hsa-mir-548g				0
AD Lung Stearman	13			hsa-mir-455-5p		hsa-mir-23a		0
AD Lung Stearman	19					hsa-mir-370		0
AD Lung Stearman	36					hsa-mir-1269b hsa-mir-1269		0
AD Lung Stearman	35					hsa-mir-668		0
AD Lung Stearman	33			hsa-mir-196b hsa-mir-196a		hsa-mir-1293		0
AD Lung Stearman	32					hsa-mir-588		0
FL Lymphoma Alizadeh	11			hsa-mir-148a hsa-mir-148b hsa-mir-152		hsa-mir-614		0
FL Lymphoma Alizadeh	0					hsa-mir-92a	Dysregulated	0
FL Lymphoma Alizadeh	2	hsa-mir-425*				hsa-mir-149	Dysregulated	0
FL Lymphoma Alizadeh	5					hsa-mir-581		0
FL Lymphoma Alizadeh	4	hsa-mir-4261		hsa-mir-1295				0
FL Lymphoma Alizadeh	7					hsa-mir-1282		0
FL Lymphoma Alizadeh	6			hsa-mir-338-5p	Dysregulated			0
FL Lymphoma Alizadeh	9			hsa-mir-767-3p		hsa-mir-942		0
DLBCL Lymphoma Alizadeh	11			hsa-mir-1203				0
DLBCL Lymphoma Alizadeh	10			hsa-mir-325				0
DLBCL Lymphoma Alizadeh	1			hsa-mir-138		hsa-mir-16		0
DLBCL Lymphoma Alizadeh	3					hsa-mir-744		0
DLBCL Lymphoma Alizadeh	2					hsa-mir-660		0
DLBCL Lymphoma Alizadeh	5	hsa-mir-132*		hsa-mir-198				0
DLBCL Lymphoma Alizadeh	4					hsa-mir-297		0
DLBCL Lymphoma Alizadeh	7			hsa-mir-532-3p		hsa-mir-1301		0
DLBCL Lymphoma Alizadeh	6			hsa-mir-542-5p		hsa-mir-483-3p		0
DLBCL Lymphoma Alizadeh	9			hsa-mir-892b		hsa-mir-1277		0
CLL Lymphoma Alizadeh	13					hsa-mir-423-5p		0
CLL Lymphoma Alizadeh	1					hsa-mir-1204		0
CLL Lymphoma Alizadeh	0			hsa-mir-1283		hsa-mir-548j		0
CLL Lymphoma Alizadeh	3			hsa-mir-513b				0
CLL Lymphoma Alizadeh	4					hsa-mir-29b	Causal	0
CLL Lymphoma Alizadeh	7			hsa-mir-1263				0
CLL Lymphoma Alizadeh	8			hsa-mir-222				0
ME Melanoma Hoek	25					hsa-mir-26a		0
ME Melanoma Hoek	26					hsa-mir-577		0
ME Melanoma Hoek	20					hsa-mir-331-5p	Dysregulated	0
OD Brain Bredel	50					hsa-mir-1254		0
ME Melanoma Hoek	47			hsa-mir-549				0
ME Melanoma Hoek	44			hsa-mir-1299		hsa-mir-1183		0
ME Melanoma Hoek	41			hsa-mir-938		hsa-mir-451b hsa-mir-451		0
ME Melanoma Hoek	0			hsa-mir-34b	Dysregulated	hsa-mir-582-5p		0
ME Melanoma Hoek	3	hsa-mir-4285						0
CA Bladder Dyrskjot	9			hsa-mir-452	Dysregulated	hsa-mir-548c-3p		0
ME Melanoma Hoek	6			hsa-mir-410		hsa-mir-186		0
ME Melanoma Hoek	9			hsa-mir-106b hsa-mir-17 hsa-mir-106a hsa-mir-93 hsa-mir-20b hsa-mir-20a	Dysregulated	hsa-mir-494		0
ME Melanoma Hoek	39			hsa-mir-212 hsa-mir-132		hsa-mir-944		0
ME Melanoma Hoek	12			hsa-mir-892a		hsa-mir-935		0
ME Melanoma Hoek	15			hsa-mir-217		hsa-mir-1292		0
ME Melanoma Hoek	16					hsa-mir-631		0
ME Melanoma Hoek	33					hsa-mir-1265		0
ME Melanoma Hoek	23			hsa-mir-32				0
ME Melanoma Hoek	37					hsa-mir-380		0
ME Melanoma Hoek	50			hsa-mir-548c-3p				0
GCT Seminoma Korkola	92					hsa-mir-564		0
ML Melanoma Talantov	25			hsa-mir-606				0
ML Melanoma Talantov	26			hsa-mir-607		hsa-mir-664		0
ML Melanoma Talantov	27					hsa-mir-96	Dysregulated	0
ML Melanoma Talantov	21					hsa-mir-450b-5p		0
ML Melanoma Talantov	22			hsa-mir-520d-5p hsa-mir-524-5p		hsa-mir-570		0
ML Melanoma Talantov	23			hsa-mir-548p				0
ML Melanoma Talantov	28	hsa-mir-3175				hsa-mir-1207-5p		0
ML Melanoma Talantov	29					hsa-mir-1257		0
ML Melanoma Talantov	40					hsa-mir-296-5p		0
ML Melanoma Talantov	0			hsa-mir-603				0
ML Melanoma Talantov	3			hsa-mir-181a hsa-mir-181d hsa-mir-181b hsa-mir-181c	Dysregulated	hsa-mir-548n		0
ML Melanoma Talantov	4					hsa-mir-146b-3p		0
ML Melanoma Talantov	7			hsa-mir-125b hsa-mir-125a-5p	Dysregulated	hsa-mir-296-5p		0
ML Melanoma Talantov	9			hsa-mir-151-3p		hsa-mir-493		0
ML Melanoma Talantov	8					hsa-mir-199b-5p	Dysregulated	0
ML Melanoma Talantov	13	hsa-mir-337-5p						0
ML Melanoma Talantov	10			hsa-mir-623		hsa-mir-1180		0
ML Melanoma Talantov	12			hsa-mir-125b hsa-mir-125a-5p	Dysregulated	hsa-mir-324-3p		0
ML Melanoma Talantov	14			hsa-mir-519a hsa-mir-519c-3p hsa-mir-519b-3p		hsa-mir-548c-3p		0
ML Melanoma Talantov	19	hsa-mir-302c*		hsa-mir-421		hsa-mir-548c-3p		0
ML Melanoma Talantov	18					hsa-mir-513a-3p		0
ML Melanoma Talantov	36					hsa-mir-663b hsa-mir-663		0
ML Melanoma Talantov	34	hsa-mir-548c-3p		hsa-mir-767-3p		hsa-mir-548n		0
ML Melanoma Talantov	33					hsa-mir-605		0
MPM Mesothelioma Gordon	56			hsa-mir-595	Dysregulated	hsa-mir-590-3p		0
MPM Mesothelioma Gordon	41			hsa-mir-519e		hsa-mir-381		0
MPM Mesothelioma Gordon	42			hsa-mir-183		hsa-mir-539		0
MPM Mesothelioma Gordon	29					hsa-mir-1265		0
MPM Mesothelioma Gordon	61			hsa-mir-545		hsa-mir-1287		0
MPM Mesothelioma Gordon	62			hsa-mir-1279		hsa-mir-708		0
MPM Mesothelioma Gordon	36					hsa-mir-487a		0
MPM Mesothelioma Gordon	64					hsa-mir-655		0
MPM Mesothelioma Gordon	65			hsa-mir-590-3p		hsa-mir-548n		0
MPM Mesothelioma Gordon	52					hsa-mir-606		0
MPM Mesothelioma Gordon	24					hsa-mir-361-3p		0
MPM Mesothelioma Gordon	27			hsa-mir-1301		hsa-mir-128		0
MPM Mesothelioma Gordon	21					hsa-mir-548c-3p		0
MPM Mesothelioma Gordon	22	hsa-mir-1284						0
MPM Mesothelioma Gordon	44					hsa-mir-338-5p		0
MPM Mesothelioma Gordon	48			hsa-mir-561		hsa-mir-606		0
MPM Mesothelioma Gordon	28					hsa-mir-590-3p		0
MPM Mesothelioma Gordon	40	hsa-mir-3178						0
MPM Mesothelioma Gordon	1					hsa-mir-1224-5p		0
MPM Mesothelioma Gordon	2					hsa-mir-1207-5p		0
MPM Mesothelioma Gordon	5					hsa-mir-603		0
MPM Mesothelioma Gordon	7			hsa-mir-526b				0
MPM Mesothelioma Gordon	6					hsa-mir-192		0
MPM Mesothelioma Gordon	9	hsa-mir-219-5p						0
MPM Mesothelioma Gordon	8					hsa-mir-1180		0
MPM Mesothelioma Gordon	35			hsa-mir-371b-5p hsa-mir-371-5p				0
MPM Mesothelioma Gordon	13	hsa-mir-1250				hsa-mir-585		0
MPM Mesothelioma Gordon	38			hsa-mir-1276		hsa-mir-145		0
MPM Mesothelioma Gordon	59					hsa-mir-423-5p	Dysregulated	0
MPM Mesothelioma Gordon	14			hsa-mir-361-3p				0
MPM Mesothelioma Gordon	11			hsa-mir-491-3p		hsa-mir-889		0
MPM Mesothelioma Gordon	15					hsa-mir-1229		0
MPM Mesothelioma Gordon	17					hsa-mir-1296		0
MPM Mesothelioma Gordon	16			hsa-mir-548m		hsa-mir-590-3p		0
MPM Mesothelioma Gordon	54					hsa-mir-548h		0
MPM Mesothelioma Gordon	51			hsa-mir-605		hsa-mir-376a		0
MPM Mesothelioma Gordon	53			hsa-mir-1182				0
MPM Mesothelioma Gordon	19	hsa-mir-615-5p				hsa-mir-423-5p	Dysregulated	0
MPM Mesothelioma Gordon	63			hsa-mir-548b-5p hsa-mir-548am hsa-mir-548ab hsa-mir-548aa hsa-mir-548ag hsa-mir-548ak hsa-mir-548aj hsa-mir-548ai hsa-mir-548ah hsa-mir-548an hsa-mir-548al hsa-mir-548ae hsa-mir-548ad hsa-mir-548a-5p hsa-mir-548ac hsa-mir-548d-5p hsa-mir-548i hsa-mir-548j hsa-mir-548c-5p hsa-mir-548h		hsa-mir-548c-3p		0
MPM Mesothelioma Gordon	32					hsa-mir-541		0
MPM Mesothelioma Gordon	31					hsa-mir-127-5p	Causal	0
MM Myeloma Zhan	45			hsa-mir-595				0
MM Myeloma Zhan	22			hsa-mir-1236				0
MM Myeloma Zhan	36					hsa-mir-1273 hsa-mir-1273c hsa-mir-1273d hsa-mir-1273e hsa-mir-1273f hsa-mir-1273g		0
MM Myeloma Zhan	24			hsa-mir-140-3p	Dysregulated			0
MM Myeloma Zhan	25			hsa-mir-188-5p				0
MM Myeloma Zhan	26					hsa-mir-1321		0
MM Myeloma Zhan	20			hsa-mir-1226				0
MM Myeloma Zhan	21			hsa-mir-183				0
MM Myeloma Zhan	49					hsa-mir-138		0
MM Myeloma Zhan	46			hsa-mir-425				0
MM Myeloma Zhan	47			hsa-mir-875-3p		hsa-mir-662		0
MM Myeloma Zhan	43			hsa-mir-23b hsa-mir-23a		hsa-mir-124	Causal	0
MM Myeloma Zhan	40			hsa-mir-382		hsa-mir-612		0
MM Myeloma Zhan	41					hsa-mir-339-5p		0
MM Myeloma Zhan	1			hsa-mir-519e				0
MM Myeloma Zhan	0					hsa-mir-1207-5p		0
MM Myeloma Zhan	3			hsa-mir-590-3p		hsa-mir-548c-3p		0
MM Myeloma Zhan	2			hsa-mir-587				0
MM Myeloma Zhan	4			hsa-mir-361-3p		hsa-mir-185		0
MM Myeloma Zhan	7			hsa-mir-510		hsa-mir-645		0
MM Myeloma Zhan	6			hsa-mir-516b		hsa-mir-600		0
MM Myeloma Zhan	9			hsa-mir-9		hsa-mir-185		0
MM Myeloma Zhan	39					hsa-mir-647		0
MM Myeloma Zhan	38					hsa-mir-652		0
MM Myeloma Zhan	29			hsa-mir-760				0
MM Myeloma Zhan	11					hsa-mir-658		0
AD Lung Beer	10					hsa-mir-600		0
MM Myeloma Zhan	13			hsa-mir-655		hsa-mir-770-5p		0
MM Myeloma Zhan	15					hsa-mir-922		0
CA Bladder Dyrskjot	62					hsa-mir-637		0
MM Myeloma Zhan	17			hsa-mir-320e hsa-mir-320d hsa-mir-320c hsa-mir-320b hsa-mir-320a		hsa-mir-495		0
MM Myeloma Zhan	16					hsa-mir-134		0
MM Myeloma Zhan	32			hsa-mir-212 hsa-mir-132		hsa-mir-379		0
MM Myeloma Zhan	31			hsa-mir-597		hsa-mir-512-3p		0
MM Myeloma Zhan	30			hsa-mir-588				0
MM Myeloma Zhan	50					hsa-mir-28-5p		0
MM Myeloma Zhan	35			hsa-mir-650		hsa-mir-129-5p		0
MM Myeloma Zhan	34					hsa-mir-147 hsa-mir-147b		0
MM Myeloma Zhan	33					hsa-mir-507		0
AD Ovarian Welsh	24	hsa-mir-1469						0
AD Ovarian Welsh	26			hsa-mir-210				0
AD Ovarian Welsh	20			hsa-mir-767-5p				0
AD Ovarian Welsh	21			hsa-mir-96		hsa-mir-606		0
AD Ovarian Welsh	22					hsa-mir-1207-5p		0
AD Ovarian Welsh	29	hsa-mir-3194-5p		hsa-mir-1280		hsa-mir-1225-3p		0
AD Ovarian Welsh	1					hsa-mir-548d-3p		0
AD Ovarian Welsh	0			hsa-mir-510		hsa-mir-200b	Causal	0
AD Ovarian Welsh	3			hsa-mir-1283				0
AD Ovarian Welsh	2			hsa-mir-122				0
AD Ovarian Welsh	5			hsa-mir-188-3p		hsa-mir-455-5p		0
AD Ovarian Welsh	4					hsa-mir-424	Dysregulated	0
AD Ovarian Welsh	7			hsa-mir-650				0
AD Ovarian Welsh	6	hsa-let-7e*						0
AD Ovarian Welsh	9					hsa-mir-524-5p		0
AD Ovarian Welsh	8					hsa-mir-1260 hsa-mir-1260b		0
AD Ovarian Welsh	11			hsa-mir-1323 hsa-mir-548o		hsa-mir-1225-5p		0
AD Ovarian Welsh	10					hsa-mir-921		0
AD Ovarian Welsh	13	hsa-mir-3178						0
CA Bladder Dyrskjot	77					hsa-mir-620		0
AD Ovarian Welsh	15			hsa-mir-1282				0
AD Ovarian Welsh	14					hsa-mir-338-5p		0
AD Ovarian Welsh	17					hsa-mir-1321		0
AD Ovarian Welsh	16					hsa-mir-548l		0
AD Ovarian Welsh	31			hsa-mir-380		hsa-mir-548c-3p		0
AD Ovarian Welsh	30			hsa-mir-1207-5p		hsa-mir-1204		0
CCC Ovarian Hendrix	56			hsa-mir-409-3p		hsa-mir-587		0
CCC Ovarian Hendrix	51			hsa-mir-1279		hsa-mir-499-3p		0
CCC Ovarian Hendrix	60			hsa-mir-105	Dysregulated	hsa-mir-1305		0
CCC Ovarian Hendrix	61					hsa-mir-145	Dysregulated	0
CCC Ovarian Hendrix	24			hsa-mir-19b hsa-mir-19a				0
CCC Ovarian Hendrix	25			hsa-mir-183	Dysregulated	hsa-mir-744		0
CCC Ovarian Hendrix	27					hsa-mir-556-5p		0
CCC Ovarian Hendrix	20					hsa-mir-495	Causal	0
CCC Ovarian Hendrix	23	hsa-mir-523		hsa-mir-105	Dysregulated			0
CCC Ovarian Hendrix	46					hsa-mir-340		0
CCC Ovarian Hendrix	47			hsa-mir-548p		hsa-mir-122		0
CCC Ovarian Hendrix	44					hsa-mir-548m		0
CCC Ovarian Hendrix	45			hsa-mir-382		hsa-mir-1250		0
CCC Ovarian Hendrix	29					hsa-mir-636		0
CCC Ovarian Hendrix	1			hsa-mir-1200				0
CCC Ovarian Hendrix	0					hsa-mir-194		0
CCC Ovarian Hendrix	2					hsa-mir-423-5p		0
CCC Ovarian Hendrix	7			hsa-mir-532-5p		hsa-mir-382		0
CCC Ovarian Hendrix	9					hsa-mir-1291		0
CCC Ovarian Hendrix	43					hsa-mir-1247		0
CCC Ovarian Hendrix	14					hsa-mir-1276		0
CCC Ovarian Hendrix	11	hsa-mir-638		hsa-mir-29b hsa-mir-29c hsa-mir-29a	Dysregulated	hsa-mir-602		0
CCC Ovarian Hendrix	10					hsa-mir-615-5p		0
CCC Ovarian Hendrix	13			hsa-mir-143	Dysregulated	hsa-mir-500b hsa-mir-500a		0
CCC Ovarian Hendrix	12			hsa-mir-876-5p		hsa-mir-508-3p		0
CCC Ovarian Hendrix	59			hsa-mir-552		hsa-mir-1258		0
CCC Ovarian Hendrix	58					hsa-mir-586		0
CCC Ovarian Hendrix	55	hsa-mir-1471						0
CCC Ovarian Hendrix	30			hsa-mir-590-5p				0
CCC Ovarian Hendrix	37			hsa-mir-1302		hsa-mir-1237		0
CCC Ovarian Hendrix	35			hsa-mir-1283		hsa-mir-607		0
CCC Ovarian Hendrix	33			hsa-mir-127-5p	Causal	hsa-mir-770-5p		0
CA Breast Sorlie	23					hsa-mir-423-5p		0
CCC Ovarian Hendrix	18					hsa-mir-326		0
CCC Ovarian Hendrix	57					hsa-mir-590-5p		0
MUC Ovarian Hendrix	30					hsa-mir-635	Dysregulated	0
MUC Ovarian Hendrix	54					hsa-mir-921		0
MUC Ovarian Hendrix	28					hsa-mir-296-5p	Dysregulated	0
MUC Ovarian Hendrix	45			hsa-mir-765				0
MUC Ovarian Hendrix	60			hsa-mir-369-3p		hsa-mir-574-3p		0
MUC Ovarian Hendrix	61			hsa-mir-940		hsa-mir-410		0
B-CLL Leukemia Haslinger	12					hsa-mir-1302		0
MUC Ovarian Hendrix	63			hsa-mir-184	Dysregulated	hsa-mir-1247		0
GCT Seminoma Korkola	71					hsa-mir-361-3p		0
MUC Ovarian Hendrix	65					hsa-mir-380		0
MUC Ovarian Hendrix	66					hsa-mir-889		0
MUC Ovarian Hendrix	67			hsa-mir-1224-3p				0
MUC Ovarian Hendrix	68			hsa-mir-606		hsa-mir-1305		0
MUC Ovarian Hendrix	69					hsa-mir-579		0
MUC Ovarian Hendrix	52					hsa-mir-541		0
MUC Ovarian Hendrix	24					hsa-mir-361-3p		0
MUC Ovarian Hendrix	25			hsa-mir-548c-3p		hsa-mir-582-5p		0
MUC Ovarian Hendrix	26					hsa-mir-296-5p	Dysregulated	0
MUC Ovarian Hendrix	27					hsa-mir-423-5p		0
MUC Ovarian Hendrix	20					hsa-mir-640		0
MUC Ovarian Hendrix	21			hsa-mir-216b		hsa-mir-520d-5p		0
MUC Ovarian Hendrix	22					hsa-mir-1293		0
MUC Ovarian Hendrix	23					hsa-mir-486-3p		0
MUC Ovarian Hendrix	47					hsa-mir-654-5p		0
MUC Ovarian Hendrix	44			hsa-mir-217				0
MUC Ovarian Hendrix	48					hsa-mir-608	Dysregulated	0
MUC Ovarian Hendrix	42	hsa-mir-1181						0
MUC Ovarian Hendrix	40					hsa-mir-618		0
MUC Ovarian Hendrix	41			hsa-mir-34a hsa-mir-34c-5p hsa-mir-449a hsa-mir-449b	Causal			0
MUC Ovarian Hendrix	0			hsa-mir-556-3p		hsa-mir-410		0
MUC Ovarian Hendrix	3					hsa-mir-1205		0
MUC Ovarian Hendrix	2			hsa-mir-22				0
MUC Ovarian Hendrix	7			hsa-mir-607		hsa-mir-590-3p		0
TU Prostate Lapointe	32					hsa-mir-608		0
MUC Ovarian Hendrix	8			hsa-mir-1226		hsa-mir-486-3p		0
MUC Ovarian Hendrix	56	hsa-mir-508-3p				hsa-mir-548c-3p		0
MUC Ovarian Hendrix	19					hsa-mir-548g		0
MUC Ovarian Hendrix	76			hsa-mir-144		hsa-mir-573		0
MUC Ovarian Hendrix	75					hsa-mir-512-3p		0
MUC Ovarian Hendrix	74			hsa-mir-27a hsa-mir-27b				0
MUC Ovarian Hendrix	73					hsa-mir-361-3p		0
MUC Ovarian Hendrix	72					hsa-mir-409-5p		0
MUC Ovarian Hendrix	71			hsa-mir-361-3p				0
MUC Ovarian Hendrix	14			hsa-mir-148a hsa-mir-148b hsa-mir-152	Dysregulated			0
AD Pancreas Logsdon	1					hsa-mir-1247		0
MUC Ovarian Hendrix	15			hsa-mir-340		hsa-mir-944		0
MUC Ovarian Hendrix	55					hsa-mir-486-3p		0
MUC Ovarian Hendrix	32					hsa-mir-490-3p		0
MUC Ovarian Hendrix	57			hsa-mir-766				0
MUC Ovarian Hendrix	49					hsa-mir-200b	Causal	0
AD Lung Bhattacharjee	16					hsa-mir-361-3p		0
MUC Ovarian Hendrix	34					hsa-mir-1291		0
MUC Ovarian Hendrix	18			hsa-mir-548n		hsa-mir-606		0
MUC Ovarian Hendrix	12					hsa-mir-658		0
MUC Ovarian Hendrix	31					hsa-mir-342-5p		0
MUC Ovarian Hendrix	50					hsa-mir-889		0
SRS Ovarian Hendrix	36					hsa-mir-890		0
SRS Ovarian Hendrix	42					hsa-mir-1298		0
SRS Ovarian Hendrix	22			hsa-mir-624				0
SRS Ovarian Hendrix	60			hsa-mir-188-3p		hsa-mir-184	Dysregulated	0
SRS Ovarian Hendrix	64					hsa-mir-377	Causal	0
SRS Ovarian Hendrix	66			hsa-mir-892b		hsa-mir-548c-3p		0
SRS Ovarian Hendrix	67					hsa-mir-608	Dysregulated	0
SRS Ovarian Hendrix	68					hsa-mir-200b	Causal	0
SRS Ovarian Hendrix	83					hsa-mir-637	Dysregulated	0
SRS Ovarian Hendrix	80					hsa-mir-324-5p		0
SRS Ovarian Hendrix	81	hsa-mir-3135b hsa-mir-3135						0
SRS Ovarian Hendrix	24					hsa-mir-635	Dysregulated	0
SRS Ovarian Hendrix	26					hsa-mir-325		0
SRS Ovarian Hendrix	27			hsa-mir-362-5p				0
SRS Ovarian Hendrix	20					hsa-mir-296-5p	Dysregulated	0
SRS Ovarian Hendrix	21					hsa-mir-944		0
SRS Ovarian Hendrix	48					hsa-mir-1278		0
SRS Ovarian Hendrix	44					hsa-mir-584		0
SRS Ovarian Hendrix	45			hsa-mir-146b-3p				0
SRS Ovarian Hendrix	28					hsa-mir-186		0
SRS Ovarian Hendrix	43					hsa-mir-299-3p		0
SRS Ovarian Hendrix	41			hsa-mir-650				0
SRS Ovarian Hendrix	1			hsa-mir-641		hsa-mir-409-3p		0
SRS Ovarian Hendrix	3					hsa-mir-146b-3p		0
SRS Ovarian Hendrix	2			hsa-mir-505				0
SRS Ovarian Hendrix	4					hsa-mir-1250		0
SRS Ovarian Hendrix	6					hsa-mir-185		0
SRS Ovarian Hendrix	9					hsa-mir-1297		0
SRS Ovarian Hendrix	19					hsa-mir-135a		0
SRS Ovarian Hendrix	75	hsa-mir-937				hsa-mir-372		0
OD Brain Bredel	40					hsa-mir-216b		0
SRS Ovarian Hendrix	17					hsa-mir-193b		0
SRS Ovarian Hendrix	70			hsa-mir-641		hsa-mir-433		0
SRS Ovarian Hendrix	15			hsa-mir-1293		hsa-let-7d	Causal	0
SRS Ovarian Hendrix	69			hsa-mir-330-3p		hsa-mir-29b		0
SRS Ovarian Hendrix	79					hsa-mir-944		0
SRS Ovarian Hendrix	78					hsa-mir-206	Dysregulated	0
SRS Ovarian Hendrix	11			hsa-mir-361-5p	Dysregulated	hsa-mir-590-3p		0
SRS Ovarian Hendrix	10					hsa-mir-34c-3p		0
SRS Ovarian Hendrix	38					hsa-mir-17		0
SRS Ovarian Hendrix	59					hsa-mir-656		0
SRS Ovarian Hendrix	14					hsa-mir-1290		0
SRS Ovarian Hendrix	61					hsa-mir-1224-3p		0
SRS Ovarian Hendrix	54			hsa-mir-448				0
SRS Ovarian Hendrix	30			hsa-mir-424	Dysregulated	hsa-mir-582-5p		0
SRS Ovarian Hendrix	53			hsa-mir-376b hsa-mir-376a	Causal	hsa-mir-576-5p		0
SRS Ovarian Hendrix	52			hsa-mir-626				0
SRS Ovarian Hendrix	55			hsa-mir-548l		hsa-mir-338-5p		0
SRS Ovarian Hendrix	16					hsa-mir-548k		0
SRS Ovarian Hendrix	32					hsa-mir-331-3p		0
SRS Ovarian Hendrix	12					hsa-mir-125a-3p		0
SRS Ovarian Hendrix	57			hsa-mir-561		hsa-mir-548d-3p		0
SRS Ovarian Hendrix	72			hsa-mir-1276				0
END Ovarian Hendrix	37					hsa-mir-125b	Dysregulated	0
END Ovarian Hendrix	60			hsa-mir-580		hsa-mir-570		0
END Ovarian Hendrix	62					hsa-mir-571		0
END Ovarian Hendrix	66					hsa-mir-101	Dysregulated	0
END Ovarian Hendrix	82	hsa-let-7d*		hsa-mir-505		hsa-mir-320b		0
END Ovarian Hendrix	32			hsa-mir-802		hsa-mir-548d-3p		0
END Ovarian Hendrix	25			hsa-mir-653				0
END Ovarian Hendrix	26			hsa-mir-548c-3p		hsa-mir-656		0
END Ovarian Hendrix	20					hsa-mir-663b hsa-mir-663	Dysregulated	0
END Ovarian Hendrix	48			hsa-mir-125a-3p		hsa-mir-1304		0
END Ovarian Hendrix	23					hsa-mir-22		0
END Ovarian Hendrix	47	hsa-mir-1471						0
END Ovarian Hendrix	45	hsa-mir-1471						0
END Ovarian Hendrix	43					hsa-mir-590-3p		0
END Ovarian Hendrix	40					hsa-mir-944		0
END Ovarian Hendrix	41					hsa-mir-338-5p		0
IDC Breast Radvanyi	46					hsa-mir-675		0
END Ovarian Hendrix	0	hsa-mir-598						0
END Ovarian Hendrix	3			hsa-mir-510		hsa-mir-1279		0
END Ovarian Hendrix	4			hsa-mir-608	Dysregulated	hsa-mir-612		0
END Ovarian Hendrix	7			hsa-mir-1302				0
END Ovarian Hendrix	6			hsa-mir-29b hsa-mir-29c hsa-mir-29a	Dysregulated	hsa-mir-890		0
END Ovarian Hendrix	9					hsa-mir-486-3p		0
END Ovarian Hendrix	8			hsa-mir-200a hsa-mir-141	Causal			0
END Ovarian Hendrix	52	hsa-mir-1538						0
END Ovarian Hendrix	28					hsa-mir-495	Causal	0
END Ovarian Hendrix	78					hsa-mir-125a-5p	Causal	0
END Ovarian Hendrix	19	hsa-mir-3195						0
END Ovarian Hendrix	39			hsa-mir-508-5p	Dysregulated			0
CA Bladder Dyrskjot	39					hsa-mir-486-3p		0
END Ovarian Hendrix	76					hsa-mir-888		0
END Ovarian Hendrix	75					hsa-mir-489		0
END Ovarian Hendrix	72					hsa-mir-548d-3p		0
END Ovarian Hendrix	70					hsa-mir-939		0
END Ovarian Hendrix	15					hsa-mir-542-3p	Dysregulated	0
END Ovarian Hendrix	69			hsa-mir-607		hsa-mir-186		0
END Ovarian Hendrix	29					hsa-mir-944		0
END Ovarian Hendrix	58	hsa-mir-621						0
END Ovarian Hendrix	11					hsa-mir-940		0
END Ovarian Hendrix	13			hsa-mir-1276		hsa-mir-23a		0
END Ovarian Hendrix	38			hsa-mir-944		hsa-mir-944		0
END Ovarian Hendrix	22			hsa-mir-15b hsa-mir-15a hsa-mir-16 hsa-mir-497 hsa-mir-195	Dysregulated	hsa-mir-944		0
END Ovarian Hendrix	17					hsa-mir-30e	Dysregulated	0
END Ovarian Hendrix	61					hsa-mir-342-5p		0
END Ovarian Hendrix	31					hsa-mir-1253		0
END Ovarian Hendrix	49					hsa-mir-145	Dysregulated	0
END Ovarian Hendrix	51			hsa-mir-130b hsa-mir-301a hsa-mir-301b hsa-mir-130a hsa-mir-454				0
END Ovarian Hendrix	50			hsa-mir-539		hsa-mir-548c-3p		0
END Ovarian Hendrix	16					hsa-mir-588		0
END Ovarian Hendrix	18	hsa-mir-487b	Dysregulated	hsa-mir-890				0
END Ovarian Hendrix	65					hsa-mir-331-3p		0
PDC Pancreas Ishikawa	1					hsa-mir-106b		0
PDC Pancreas Ishikawa	3	hsa-mir-369-5p						0
PDC Pancreas Ishikawa	2					hsa-mir-448		0
AD Pancreas Logsdon	10	hsa-mir-1273 hsa-mir-1273c hsa-mir-1273d hsa-mir-1273e hsa-mir-1273f hsa-mir-1273g						0
AD Pancreas Logsdon	13			hsa-mir-486-5p				0
AD Pancreas Logsdon	12	hsa-let-7d hsa-let-7f hsa-mir-98 hsa-let-7b hsa-let-7c hsa-let-7a hsa-let-7g hsa-let-7e hsa-let-7i	Dysregulated			hsa-mir-933		0
AD Pancreas Logsdon	15			hsa-mir-556-3p		hsa-mir-130b		0
AD Pancreas Logsdon	14			hsa-mir-517c hsa-mir-517b hsa-mir-517a				0
AD Pancreas Logsdon	16			hsa-mir-561				0
CA Bladder Dyrskjot	59					hsa-mir-374a		0
AD Pancreas Logsdon	18					hsa-mir-939		0
RCCC Renal Boer	5					hsa-mir-374a		0
AD Pancreas Logsdon	3	hsa-mir-3178						0
AD Pancreas Logsdon	4					hsa-mir-22		0
MPC Prostate Dhanasekaran	30			hsa-mir-659				0
MPC Prostate Dhanasekaran	29					hsa-mir-663b hsa-mir-663		0
MPC Prostate Dhanasekaran	26			hsa-mir-935		hsa-mir-548j		0
MPC Prostate Dhanasekaran	27					hsa-mir-1271		0
MPC Prostate Dhanasekaran	21			hsa-mir-498	Dysregulated			0
MPC Prostate Dhanasekaran	48					hsa-mir-625		0
MPC Prostate Dhanasekaran	44			hsa-mir-1323 hsa-mir-548o		hsa-mir-576-3p		0
MPC Prostate Dhanasekaran	45			hsa-mir-490-3p				0
MPC Prostate Dhanasekaran	42	hsa-mir-582-3p				hsa-mir-331-5p		0
MPC Prostate Dhanasekaran	0	hsa-mir-3074-5p		hsa-mir-1323 hsa-mir-548o		hsa-mir-200b	Causal	0
MPC Prostate Dhanasekaran	2					hsa-mir-548c-3p		0
MPC Prostate Dhanasekaran	5					hsa-mir-211		0
MPC Prostate Dhanasekaran	7			hsa-mir-330-5p hsa-mir-326	Causal	hsa-mir-296-5p	Dysregulated	0
MPC Prostate Dhanasekaran	9			hsa-mir-190b hsa-mir-190				0
MPC Prostate Dhanasekaran	8					hsa-mir-219-1-3p		0
MPC Prostate Dhanasekaran	13			hsa-mir-1257				0
MPC Prostate Dhanasekaran	12			hsa-mir-139-5p		hsa-mir-340		0
MPC Prostate Dhanasekaran	14			hsa-mir-133b hsa-mir-133a		hsa-mir-502-5p		0
MPC Prostate Dhanasekaran	11					hsa-mir-34a	Causal	0
MPC Prostate Dhanasekaran	10					hsa-mir-554		0
MPC Prostate Dhanasekaran	22			hsa-mir-105		hsa-mir-382		0
MPC Prostate Dhanasekaran	17					hsa-mir-1266		0
MPC Prostate Dhanasekaran	16			hsa-mir-944		hsa-mir-101	Causal	0
MPC Prostate Dhanasekaran	19			hsa-mir-661				0
MPC Prostate Dhanasekaran	23					hsa-mir-302f		0
GCT Seminoma Korkola	32					hsa-mir-608		0
MPC Prostate Dhanasekaran	34			hsa-mir-544 hsa-mir-544b		hsa-mir-1279		0
MPC Prostate Dhanasekaran	18					hsa-mir-1263		0
PPC Prostate Dhanasekaran	29					hsa-mir-509-3p hsa-mir-509-3-5p		0
PPC Prostate Dhanasekaran	27			hsa-mir-654-3p		hsa-mir-1279		0
PPC Prostate Dhanasekaran	20					hsa-mir-1207-5p		0
PPC Prostate Dhanasekaran	22			hsa-mir-802		hsa-mir-561		0
PPC Prostate Dhanasekaran	23			hsa-mir-376a hsa-mir-376b hsa-mir-376c		hsa-mir-518a-5p		0
PPC Prostate Dhanasekaran	28			hsa-mir-544 hsa-mir-544b		hsa-mir-944		0
PPC Prostate Dhanasekaran	41			hsa-mir-18a hsa-mir-18b		hsa-mir-369-3p		0
PPC Prostate Dhanasekaran	1			hsa-mir-520d-5p hsa-mir-524-5p		hsa-mir-561		0
PPC Prostate Dhanasekaran	0			hsa-mir-558				0
PPC Prostate Dhanasekaran	3			hsa-mir-624		hsa-mir-578		0
PPC Prostate Dhanasekaran	2			hsa-mir-217		hsa-mir-641		0
PPC Prostate Dhanasekaran	4			hsa-mir-760		hsa-mir-939		0
PPC Prostate Dhanasekaran	7					hsa-mir-1202		0
PPC Prostate Dhanasekaran	9			hsa-mir-153		hsa-mir-661		0
PPC Prostate Dhanasekaran	8					hsa-mir-340		0
PPC Prostate Dhanasekaran	12					hsa-mir-342-3p		0
PPC Prostate Dhanasekaran	11			hsa-mir-628-3p				0
PPC Prostate Dhanasekaran	10			hsa-mir-421		hsa-mir-889		0
PPC Prostate Dhanasekaran	39					hsa-mir-139-3p		0
PPC Prostate Dhanasekaran	38					hsa-mir-607		0
PPC Prostate Dhanasekaran	14			hsa-mir-34a hsa-mir-34c-5p hsa-mir-449a hsa-mir-449b	Causal	hsa-mir-1202		0
PPC Prostate Dhanasekaran	17					hsa-mir-34a	Causal	0
PPC Prostate Dhanasekaran	19	hsa-mir-101*		hsa-mir-548e		hsa-mir-144		0
PPC Prostate Dhanasekaran	31					hsa-mir-515-3p		0
PPC Prostate Dhanasekaran	37					hsa-mir-553		0
PPC Prostate Dhanasekaran	35					hsa-mir-663b hsa-mir-663		0
PPC Prostate Dhanasekaran	34					hsa-mir-149	Dysregulated	0
PPC Prostate Dhanasekaran	33					hsa-mir-548e		0
PPC Prostate Dhanasekaran	32					hsa-mir-296-5p	Dysregulated	0
BPH Prostate Dhanasekaran	20					hsa-mir-1224-3p		0
BPH Prostate Dhanasekaran	1					hsa-mir-579		0
BPH Prostate Dhanasekaran	5			hsa-mir-1283		hsa-mir-1290		0
BPH Prostate Dhanasekaran	4			hsa-mir-543		hsa-mir-1278		0
BPH Prostate Dhanasekaran	7			hsa-mir-508-5p		hsa-mir-380		0
BPH Prostate Dhanasekaran	6			hsa-mir-648				0
BPH Prostate Dhanasekaran	9					hsa-mir-574-5p		0
BPH Prostate Dhanasekaran	8			hsa-mir-891b		hsa-mir-1246		0
BPH Prostate Dhanasekaran	11			hsa-mir-520d-5p hsa-mir-524-5p		hsa-mir-369-3p		0
BPH Prostate Dhanasekaran	10			hsa-mir-1290		hsa-mir-624		0
BPH Prostate Dhanasekaran	13	hsa-mir-423-3p				hsa-mir-922		0
BPH Prostate Dhanasekaran	12			hsa-mir-33b hsa-mir-33a		hsa-mir-939		0
BPH Prostate Dhanasekaran	15			hsa-mir-770-5p				0
BPH Prostate Dhanasekaran	16			hsa-mir-548e		hsa-mir-302f		0
BPH Prostate Dhanasekaran	18					hsa-mir-513a-3p		0
TU Prostate Lapointe	24	hsa-mir-487b		hsa-mir-496		hsa-mir-548g		0
TU Prostate Lapointe	25					hsa-mir-130a		0
TU Prostate Lapointe	26	hsa-mir-566				hsa-mir-663b hsa-mir-663		0
TU Prostate Lapointe	21					hsa-mir-608		0
TU Prostate Lapointe	23					hsa-mir-25	Dysregulated	0
TU Prostate Lapointe	29					hsa-mir-522		0
TU Prostate Lapointe	40	hsa-mir-369-5p						0
TU Prostate Lapointe	1			hsa-mir-1297 hsa-mir-26a hsa-mir-26b	Dysregulated	hsa-mir-590-3p		0
TU Prostate Lapointe	0			hsa-mir-874		hsa-mir-219-2-3p		0
OD Brain Bredel	14					hsa-mir-296-5p	Causal	0
TU Prostate Lapointe	4			hsa-mir-532-3p		hsa-mir-185		0
TU Prostate Lapointe	7					hsa-mir-579		0
TU Prostate Lapointe	6					hsa-mir-876-3p		0
TU Prostate Lapointe	9			hsa-mir-208a hsa-mir-208b				0
