# Supplementary material for: A miRNA-regulatory network explains how dysregulated miRNAs perturb oncogenic processes across diverse cancers
Source: HighWire-hosted journal article supplement (doi:10.1101/gr.133991.111), 2012-06-28
Supplement: SuppTab8.xlsx [file SuppTab8.xlsx]

## Sheet: jinConrath_hallmarks
Supplementary Table 8.
Co-expression Signature	GO Terms	Mature Seqeunce IDs	Hallmarks of Cancer	Self Sufficiency In Growth Signals	Insensitivity To Antigrowth Signals	Evading Apoptosis	Limitless Replicative Potential	Sustained Angiogenesis	Tissue Invasion And Metastasis	Genome Instability And Mutation	Tumor Promoting Inflammation	Reprogramming Energy Metabolism	Evading Immune Detection
COID Lung Bhattacharjee_24	GO:0051384|GO:0050896|GO:0030155|GO:0007596|GO:0030036|GO:0006928|GO:0007160|GO:0030041|GO:0050900|GO:0001889|GO:0007411|GO:0008219|GO:0001525|GO:0042981|GO:0007275|GO:0007517|GO:0009653|GO:0000902|GO:0008064|GO:0045785|GO:0009966|GO:0031670|GO:0001568|GO:0001569|GO:0009611|GO:0050769|GO:0048812|GO:0048514|GO:0045765|GO:0016477|GO:0033144|GO:0009887|GO:0030154|GO:0030182|GO:0007584|GO:0006915|GO:…	MIMAT0004694	9	0.928014	0.928014	0.904092	0.8114	1	1	0.807256	0.85325	0.369747	0.85325
SMCL Lung Bhattacharjee_61	GO:0019226|GO:0007599|GO:0042127|GO:0007596|GO:0048468|GO:0007610|GO:0045765|GO:0001501|GO:0007165|GO:0007166|GO:0007167|GO:0030182|GO:0007169|GO:0042445|GO:0001666|GO:0009611|GO:0048511|GO:0019058|GO:0048514|GO:0030323|GO:0019725|GO:0030595|GO:0031016|GO:0006935|GO:0031100|GO:0031960|GO:0042221|GO:0046649|GO:0043434|GO:0010033|GO:0030168|GO:0016192|GO:0021930|GO:0006082|GO:0009605|GO:0048870|GO:…	MIMAT0000760	9	1	1	1	0.8114	1	1	0.850327	1	0.79023	1
AC Brain Sun_5	GO:0019730|GO:0050867|GO:0042110|GO:0006928|GO:0045580|GO:0050900|GO:0002925|GO:0008219|GO:0042981|GO:0002443|GO:0001568|GO:0043304|GO:0043065|GO:0002367|GO:0042508|GO:0032729|GO:0042108|GO:0030217|GO:0006917|GO:0045087|GO:0006915|GO:0050870|GO:0002710|GO:0006950|GO:0051249|GO:0050863|GO:0006954|GO:0006955|GO:0042088|GO:0006959|GO:0006952|GO:0050777|GO:0050776|GO:0009607|GO:0050731|GO:0050896|GO:…	MIMAT0003307|MIMAT0002840	8	0.928014	0.928014	0.904092	0.507188	0.87861	0.986717	0.828371	1	0.481695	1
GCT Seminoma Korkola_4	GO:0030301|GO:0042127|GO:0006631|GO:0045907|GO:0019221|GO:0048589|GO:0042493|GO:0007596|GO:0046022|GO:0007610|GO:0006928|GO:0006940|GO:0050900|GO:0050901|GO:0007165|GO:0007166|GO:0019915|GO:0050829|GO:0045444|GO:0032496|GO:0001525|GO:0050651|GO:0007275|GO:0034097|GO:0032091|GO:0050728|GO:0050729|GO:0016044|GO:0009617|GO:0000165|GO:0009611|GO:0009612|GO:0002687|GO:0048514|GO:0045765|GO:0016477|GO:…	MIMAT0000729|MIMAT0002172|MIMAT0000720	8	1	1	0.939943	0.516106	1	1	0.828371	0.952832	0.481858	0.952832
ME Melanoma Hoek_50	GO:0019226|GO:0008104|GO:0007599|GO:0019221|GO:0051234|GO:0015721|GO:0007596|GO:0048468|GO:0048771|GO:0007610|GO:0007611|GO:0008064|GO:0001501|GO:0001502|GO:0001503|GO:0050920|GO:0007165|GO:0007166|GO:0007167|GO:0007169|GO:0055082|GO:0048665|GO:0042445|GO:0042446|GO:0009968|GO:0009966|GO:0009611|GO:0018193|GO:0048513|GO:0048514|GO:0010720|GO:0014075|GO:0006171|GO:0042127|GO:0030154|GO:0015844|GO:…	MIMAT0003285	8	1	1	0.871787	0.53089	0.916996	1	0.828371	0.952832	0.785769	0.952832
CA Bladder Dyrskjot_82	GO:0019221|GO:0050867|GO:0042982|GO:0030335|GO:0042110|GO:0006928|GO:0050900|GO:0001503|GO:0007166|GO:0060326|GO:0001525|GO:0006935|GO:0009653|GO:0009615|GO:0001568|GO:0001944|GO:0009611|GO:0051270|GO:0048514|GO:0016477|GO:0031295|GO:0042127|GO:0007626|GO:0009887|GO:0030334|GO:0030593|GO:0006629|GO:0008283|GO:0050793|GO:0060337|GO:0009987|GO:0042060|GO:0006952|GO:0006950|GO:0046649|GO:0050863|GO:…	MIMAT0003332|MIMAT0002853	7	0.943964	0.928014	0.594385	0.507188	0.916996	1	0.828371	1	0.488619	1
CA Colon Graudens_40	GO:0042127|GO:0008285|GO:0002756|GO:0034138|GO:0008283|GO:0043687|GO:0006915|GO:0009611|GO:0006464|GO:0006950|GO:0007165|GO:0034142|GO:0008063|GO:0002224|GO:0044267|GO:0008219|GO:0042981	MIMAT0002879|MIMAT0003221|MIMAT0000721	7	1	1	0.904092	0.507188	0.457063	0.959839	0.828371	0.932605	0.481695	0.932605
COID Lung Bhattacharjee_92	GO:0032502|GO:0031018|GO:0030336|GO:0019083|GO:0006928|GO:0030334|GO:0007165|GO:0007166|GO:0042221|GO:0001525|GO:0007275|GO:0042273|GO:0044267|GO:0042446|GO:0042274|GO:0042127|GO:0001568|GO:0009611|GO:0016043|GO:0019058|GO:0048514|GO:0006364|GO:0016477|GO:0048646|GO:0008284|GO:0008285|GO:0009887|GO:0006700|GO:0048608|GO:0008283|GO:0050793|GO:0007584|GO:0050790|GO:0042060|GO:0042254|GO:0006950|GO:…	MIMAT0004970	7	1	1	0.613804	0.507188	0.916996	1	0.850327	0.952832	0.488619	0.952832
MPM Mesothelioma Gordon_5	GO:0042127|GO:0051384|GO:0045765|GO:0045428|GO:0032494|GO:0032496|GO:0001525|GO:0044245|GO:0034097|GO:0009617|GO:0009611|GO:0009612|GO:0002687|GO:0016477|GO:0048644|GO:0008284|GO:0006935|GO:0006916|GO:0060055|GO:0045597|GO:0006954|GO:0006955|GO:0006952|GO:0010574|GO:0002690|GO:0010759	MIMAT0003271	7	1	0.913373	0.939943	0.420235	1	1	0.741418	0.952832	0.394741	0.952832
AD Lung Beer_32	GO:0010574|GO:0007599|GO:0048568|GO:0007596|GO:0030335|GO:0006928|GO:0001501|GO:0050900|GO:0030334|GO:0007165|GO:0007166|GO:0019915|GO:0045444|GO:0048870|GO:0001525|GO:0007275|GO:0014070|GO:0032091|GO:0050728|GO:0009653|GO:0001568|GO:0043410|GO:0009611|GO:0002687|GO:0048514|GO:0016477|GO:0042127|GO:0008285|GO:0009887|GO:0030154|GO:0006935|GO:0008283|GO:0008015|GO:0007585|GO:0050727|GO:0050873|GO:…	MIMAT0003332	6	1	1	0.613804	0.428802	1	1	0.749984	0.952832	0.403308	0.952832
AD Ovarian Welsh_16	GO:0000084|GO:0000082|GO:0006805|GO:0009410|GO:0009411|GO:0051439|GO:0006091|GO:0051436|GO:0042981|GO:0008219|GO:0007049|GO:0007346|GO:0043161|GO:0006521|GO:0006520|GO:0055114|GO:0000278|GO:0009308|GO:0006915|GO:0006725|GO:0000216|GO:0031145|GO:0006974|GO:0006950|GO:0006977|GO:0030163|GO:0008152|GO:0043627|GO:0046100|GO:0008202|GO:0051603|GO:0000718|GO:0006576|GO:0051726|GO:0046390|GO:0034641|GO:…	MIMAT0005889	6	0.816067	0.961157	0.904092	0.577611	0.314416	0.845215	0.969259	0.648171	0.81073	0.648171
AD Ovarian Welsh_26	GO:0006968|GO:0019221|GO:0007596|GO:0030889|GO:0042110|GO:0006928|GO:0050900|GO:0007165|GO:0007166|GO:0044419|GO:0008219|GO:0042981|GO:0002474|GO:0009615|GO:0009617|GO:0043065|GO:0002690|GO:0019882|GO:0008283|GO:0009306|GO:0006917|GO:0006915|GO:0042100|GO:0006952|GO:0060333|GO:0060337|GO:0006954|GO:0006955|GO:0006959|GO:0030168|GO:0050776|GO:0051607|GO:0045672|GO:0001916|GO:0001915	MIMAT0000267	6	1	1	0.904092	0.428802	0.495084	0.987424	0.749984	1	0.481858	1
B-CLL Leukemia Haslinger_9	GO:0006952|GO:0045086|GO:0042089|GO:0050863|GO:0007596|GO:0009611|GO:0042060|GO:0001816|GO:0006950|GO:0050776|GO:0007165|GO:0007166|GO:0006955|GO:0030193|GO:0031295|GO:0030168|GO:0042108	MIMAT0005897|MIMAT0019950	6	1	1	0.584385	0.507188	0.495084	1	0.828371	1	0.481695	1
END Ovarian Hendrix_58	GO:0006968|GO:0042110|GO:0050862|GO:0045580|GO:0050900|GO:0007165|GO:0007166|GO:0051249|GO:0030217|GO:0048535|GO:0031295|GO:0050851|GO:0050852|GO:0050853|GO:0006935|GO:0019722|GO:0006874|GO:0042100|GO:0050870|GO:0006952|GO:0006950|GO:0046649|GO:0050863|GO:0006954|GO:0006955|GO:0007154|GO:0050776|GO:0007204|GO:0030097	MIMAT0003290	6	1	1	0.584385	0.507188	0.552288	0.897776	0.828371	1	0.481695	1
GL Brain Rickman_15	GO:0042127|GO:0008285|GO:0042089|GO:0050896|GO:0042493|GO:0009611|GO:0042060|GO:0006950|GO:0007165|GO:0006955	MIMAT0002178	6	1	1	0.613804	0.507188	0.421959	1	0.828371	0.952832	0.481695	0.952832
IDC Breast Radvanyi_24	GO:0006922|GO:0050863|GO:0007596|GO:0046633|GO:0018108|GO:0050862|GO:0050900|GO:0007165|GO:0007166|GO:0045058|GO:0045059|GO:0002286|GO:0009615|GO:0050849|GO:0019722|GO:0031295|GO:0050850|GO:0050851|GO:0050852|GO:0050776|GO:0030217|GO:0045086|GO:0050690|GO:0042102|GO:0006952|GO:0006950|GO:0046649|GO:0042110|GO:0006954|GO:0006955|GO:0007154|GO:0045060|GO:0050896|GO:0051249|GO:0045730|GO:0050870|GO:…	MIMAT0005881	6	1	1	0.584385	0.507188	0.516654	0.987424	0.828371	1	0.481695	1
AD Lung Bhattacharjee_41	GO:0051384|GO:0016337|GO:0030036|GO:0006928|GO:0007155|GO:0050900|GO:0042744|GO:0007165|GO:0009653|GO:0000902|GO:0001568|GO:0009611|GO:0048513|GO:0016477|GO:0002040|GO:0002042|GO:0042127|GO:0008285|GO:0009887|GO:0030334|GO:0008283|GO:0006461|GO:0051492|GO:0060055|GO:0003007|GO:0006950|GO:0032956|GO:0030041|GO:0051259|GO:0007015|GO:0042542|GO:0009725|GO:0050896|GO:0048870|GO:0042493|GO:0048545|GO:…	MIMAT0000690	5	1	1	0.613804	0.53089	0.87861	1	0.828371	0.760119	0.481695	0.760119
AD Lung Stearman_19	GO:0042127|GO:0030154|GO:0009887|GO:0006928|GO:0050900|GO:0007165|GO:0007166|GO:0007167|GO:0001525|GO:0007275|GO:0009653|GO:0000902|GO:0001568|GO:0008283|GO:0000165|GO:0009611|GO:0048513|GO:0048514|GO:0016477|GO:0008284|GO:0030336|GO:0006468|GO:0006937|GO:0008015|GO:0042325|GO:0017015|GO:0042060|GO:0006950|GO:0042221|GO:0007154|GO:0007179|GO:0040011|GO:0001570|GO:0051271|GO:0042326|GO:0048870|GO:…	MIMAT0000722	5	1	1	0.584385	0.507188	1	1	0.828371	0.760119	0.488619	0.760119
AD Ovarian Welsh_1	GO:0008584|GO:0030509|GO:0010628|GO:0051412|GO:0007275|GO:0014070|GO:0045941|GO:0009636|GO:0006979|GO:0043066|GO:0006366|GO:0032569|GO:0043069|GO:0010468|GO:0042127|GO:0008285|GO:0048662|GO:0008283|GO:0042060|GO:0048168|GO:0006950|GO:0045893|GO:0008152|GO:0030041|GO:0007611|GO:0010033|GO:0007179|GO:0001300|GO:0009725|GO:0050896|GO:0060213|GO:0006355|GO:0006357|GO:0060395	MIMAT0003323	5	0.943964	1	1	0.616657	0.599829	1	0.828371	0.760119	0.481695	0.760119
AD Ovarian Welsh_4	GO:0002504|GO:0019882|GO:0050776|GO:0007166|GO:0002540|GO:0009611|GO:0050778|GO:0006952|GO:0060333|GO:0050852|GO:0007165|GO:0006954|GO:0006955|GO:0019372|GO:0031295|GO:0019221	MIMAT0001341	5	1	1	0.584385	0.428802	0.503192	0.959839	0.749984	1	0.481858	1
B-CLL Leukemia Haslinger_27	GO:0006986|GO:0009607|GO:0008283|GO:0000079|GO:0006915|GO:0006950|GO:0051726|GO:0045926|GO:0006334|GO:0007049	MIMAT0004957	5	0.915823	0.975519	0.871271	0.507188	0.238026	0.845215	0.828371	0.648171	0.481695	0.648171
CA Renal Higgins_20	GO:0002504|GO:0019882|GO:0050776|GO:0019221|GO:0009615|GO:0050896|GO:0009611|GO:0042110|GO:0006952|GO:0060333|GO:0051249|GO:0050870|GO:0007165|GO:0006955|GO:0060337|GO:0031295|GO:0044419	MIMAT0005913	5	1	1	0.584385	0.428802	0.421959	0.959839	0.749984	1	0.481858	1
GL Brain Rickman_8	GO:0051384|GO:0008285|GO:0007613|GO:0007611|GO:0007165|GO:0032496|GO:0001661|GO:0014070|GO:0009636|GO:0007626|GO:0006935|GO:0031622|GO:0008283|GO:0006874|GO:0050806|GO:0006952|GO:0060213|GO:0008306|GO:0006954|GO:0006955|GO:0007154|GO:0006959|GO:0032225|GO:0009607|GO:0007243|GO:0009725|GO:0010243|GO:0010574|GO:0017085|GO:0010575	MIMAT0003304	5	1	1	0.613804	0.62783	0.516654	0.886385	0.749984	0.952832	0.403308	0.952832
HSCC Head-Neck Chung_9	GO:0006935|GO:0060326|GO:0009611|GO:0006928|GO:0006952|GO:0050900|GO:0007165|GO:0007166|GO:0006955|GO:0007154|GO:0010759|GO:0016477|GO:0048246	MIMAT0004926	5	1	1	0.584385	0.428802	0.516654	1	0.749984	0.952832	0.403308	0.952832
HSCC Head-Neck Cromer_10	GO:0044419|GO:0019221|GO:0009615|GO:0006334|GO:0006952|GO:0060333|GO:0006977|GO:0007165|GO:0007166|GO:0006955|GO:0060337|GO:0051607	MIMAT0002833	5	1	1	0.584385	0.428802	0.495084	0.758261	0.806555	0.952832	0.481858	0.952832
SMCL Lung Bhattacharjee_41	GO:0002504|GO:0050776|GO:0050896|GO:0006952|GO:0060333|GO:0006954|GO:0006955|GO:0031295|GO:0006740	MIMAT0002823	5	0.928014	0.928014	0.425286	0.420235	0.395429	0.853949	0.741418	1	0.394741	1
AD Lung Beer_35	GO:0042127|GO:0030324|GO:0022601|GO:0048146|GO:0048145|GO:0006928|GO:0001501|GO:0009653|GO:0007275|GO:0001525|GO:0000902|GO:0001568|GO:0009611|GO:0048514|GO:0010463|GO:0008284|GO:0006936|GO:0008283|GO:0008015|GO:0042063|GO:0042060|GO:0006956|GO:0007155|GO:0006958|GO:0031069|GO:0040007|GO:0050678|GO:0030539|GO:0001837|GO:0030198|GO:0043627|GO:0002576	MIMAT0000279	4	1	0.913373	0.415328	0.416224	0.916996	1	0.713746	0.794641	0.36707	0.794641
GL Brain Rickman_31	GO:0060346|GO:0048630|GO:0031017|GO:0030154|GO:0006928|GO:0032964|GO:0001501|GO:0001503|GO:0060324|GO:0009653|GO:0007275|GO:0008544|GO:0010560|GO:0008645|GO:0001568|GO:0015758|GO:0016477|GO:0043588|GO:0008284|GO:0009887|GO:0030238|GO:0007584|GO:0070208|GO:0051291|GO:0001957|GO:0043491|GO:0030199|GO:0030198|GO:0001934	MIMAT0000063|MIMAT0000064|MIMAT0000062|MIMAT0000067|MIMAT0000414|MIMAT0000065|MIMAT0000066|MIMAT0000415|MIMAT0000096	4	1	0.857337	0.369319	0.416224	0.87861	1	0.546689	0.444622	0.218005	0.444622
AD Lung Beer_24	GO:0050766|GO:0006935|GO:0002576|GO:0009611|GO:0007610|GO:0006950	MIMAT0003948	4	0.816067	0.816067	0.313339	0.507188	0.238026	0.959839	0.828371	0.648171	0.481695	0.648171
AD Lung Bhattacharjee_49	GO:0002504|GO:0019882|GO:0050776|GO:0019221|GO:0050852|GO:0060333|GO:0007165|GO:0007166|GO:0006955|GO:0031295	MIMAT0003231	4	1	1	0.584385	0.428802	0.495084	0.661281	0.749984	1	0.481858	1
B-CLL Leukemia Haslinger_23	GO:0060334|GO:0000084|GO:0051603|GO:0000082|GO:0051439|GO:0044237|GO:0050434|GO:0051436|GO:0051437|GO:0006139|GO:0043161|GO:0006521|GO:0044419|GO:0010467|GO:0006367|GO:0006366|GO:0006369|GO:0006508|GO:0008380|GO:0006915|GO:0030330|GO:0009987|GO:0000216|GO:0031145|GO:0006974|GO:0000375|GO:0006977|GO:0030163|GO:0008152|GO:0006368|GO:0022904|GO:0016925|GO:0042770|GO:0016070|GO:0016071|GO:0051443|GO:…	MIMAT0005919	4	0.837583	0.837583	0.871271	0.577611	0.378622	0.704327	0.969259	0.630577	0.69764	0.630577
CA Breast Sorlie_17	GO:0002474|GO:0019060|GO:0050776|GO:0009607|GO:0019221|GO:0044419|GO:0060333|GO:0051607|GO:0009615|GO:0050896|GO:0019882|GO:0006952|GO:0006513|GO:0060337|GO:0016032|GO:0006955|GO:0032020	MIMAT0003310	4	0.928014	0.928014	0.425286	0.420235	0.395429	0.758261	0.741418	1	0.481858	1
COID Lung Bhattacharjee_36	GO:0042127|GO:0030336|GO:0030334|GO:0000902|GO:0006936|GO:0006937|GO:0001568|GO:0008283|GO:0017015|GO:0001822|GO:0008277|GO:0048513|GO:0007165|GO:0007166|GO:0007155|GO:0007275	MIMAT0004912	4	1	1	0.584385	0.428802	0.87861	1	0.749984	0.688133	0.403308	0.688133
END Ovarian Hendrix_6	GO:0007517|GO:0031589|GO:0001568|GO:0030154|GO:0017015|GO:0001822|GO:0006928|GO:0001501|GO:0030199|GO:0001503|GO:0007167|GO:0007155|GO:0030512|GO:0009653|GO:0007275|GO:0007179|GO:0030198	MIMAT0004912|MIMAT0000100|MIMAT0000681|MIMAT0000086	4	0.835987	0.835987	0.420373	0.416224	0.87861	1	0.585972	0.551715	0.239295	0.551715
GCT Seminoma Korkola_102	GO:0050776|GO:0050863|GO:0045087|GO:0050670|GO:0042110|GO:0042102|GO:0006952|GO:0046649|GO:0045954|GO:0007165|GO:0007166|GO:0006955|GO:0007154|GO:0043366|GO:0001909	MIMAT0000443|MIMAT0000423|MIMAT0000255	4	1	1	0.584385	0.428802	0.516654	0.758261	0.749984	1	0.403308	1
GL Brain Rickman_26	GO:0006950	MIMAT0007347	4	0.816067	0.816067	0.313339	0.507188	0.238026	0.845215	0.828371	0.648171	0.481695	0.648171
HSCC Head-Neck Chung_1	GO:0042127|GO:0033138|GO:0030325|GO:0060346|GO:0030154|GO:0048705|GO:0030335|GO:0006928|GO:0007160|GO:0001501|GO:0001503|GO:0060325|GO:0060324|GO:0007166|GO:0031175|GO:0007411|GO:0009653|GO:0030178|GO:0008544|GO:0009968|GO:0001568|GO:0007275|GO:0016477|GO:0008218|GO:0008284|GO:0009887|GO:0030334|GO:0030182|GO:0008283|GO:0007155|GO:0030514|GO:0030512|GO:0032964|GO:0042327|GO:0050678|GO:0050679|GO:…	MIMAT0004909|MIMAT0000100|MIMAT0000681|MIMAT0003882|MIMAT0000086	4	1	1	0.628128	0.416224	0.87861	1	0.711515	0.73211	0.330182	0.73211
MM Myeloma Zhan_29	GO:0044419|GO:0019221|GO:0009615|GO:0006334|GO:0006952|GO:0060333|GO:0007165|GO:0007166|GO:0065004|GO:0042981|GO:0060337	MIMAT0004957	4	1	1	0.904092	0.428802	0.495084	0.758261	0.806555	0.688133	0.481858	0.688133
MM Myeloma Zhan_47	GO:0034641|GO:0006950|GO:0006520|GO:0051384|GO:0007584	MIMAT0004923|MIMAT0003325	4	0.816067	0.816067	0.467879	0.507188	0.252115	0.845215	0.828371	0.648171	0.481695	0.648171
MM Myeloma Zhan_49	GO:0009887|GO:0009605|GO:0048870|GO:0050896|GO:0007202|GO:0009611|GO:0006928|GO:0006950|GO:0048513|GO:0007166|GO:0014070	MIMAT0000430	4	0.928014	0.928014	0.51126	0.507188	0.599464	1	0.828371	0.760119	0.481695	0.760119
MPM Mesothelioma Gordon_7	GO:0044419|GO:0019060|GO:0009607|GO:0019221|GO:0051603|GO:0009615|GO:0060337|GO:0019941|GO:0006952|GO:0060333|GO:0032480|GO:0007165|GO:0007166|GO:0006955|GO:0032020	MIMAT0002835	4	1	1	0.584385	0.428802	0.495084	0.758261	0.749984	0.952832	0.559092	0.952832
SMCL Lung Bhattacharjee_36	GO:0045444|GO:0051384|GO:0030154|GO:0031589|GO:0030036|GO:0006928|GO:0030509|GO:0031175|GO:0007411|GO:0009653|GO:0007275|GO:0002009|GO:0007517|GO:0001822|GO:0042127|GO:0009887|GO:0032507|GO:0006936|GO:0017015|GO:0045595|GO:0048041|GO:0010038|GO:0001657|GO:0007155|GO:0045807|GO:0007179|GO:0042325|GO:0051271|GO:0007010|GO:0010269|GO:0010886|GO:0034394|GO:0001933|GO:0043116	MIMAT0000690	4	0.943964	0.913373	0.479341	0.474255	0.734896	1	0.807256	0.551715	0.260094	0.551715
SQ Lung Bhattacharjee_13	GO:0051384|GO:0007599|GO:0007596|GO:0030036|GO:0006928|GO:0008064|GO:0007155|GO:0007411|GO:0009653|GO:0007275|GO:0000902|GO:0030837|GO:0002576|GO:0009611|GO:0016043|GO:0016477|GO:0042127|GO:0008285|GO:0030334|GO:0008283|GO:0051017|GO:0042060|GO:0008154|GO:0032956|GO:0030041|GO:0042632|GO:0055088|GO:0051271|GO:0007010|GO:0016192|GO:0048870|GO:0042493|GO:0010884	MIMAT0000690	4	0.943964	1	0.613804	0.53089	0.698206	1	0.850327	0.533547	0.36707	0.533547
SRS Ovarian Hendrix_14	GO:0048705|GO:0030154|GO:0006928|GO:0001501|GO:0001503|GO:0009653|GO:0007275|GO:0000904|GO:0001568|GO:0009611|GO:0048514|GO:0030855|GO:0010761|GO:0008218|GO:0051918|GO:0042127|GO:0008285|GO:0009887|GO:0008283|GO:0017015|GO:0007155|GO:0030512|GO:0007179|GO:0031638|GO:0016477|GO:0048870|GO:0001957|GO:0002544|GO:0030198|GO:0010757|GO:0001525|GO:0030195	MIMAT0005880	4	0.943964	1	0.613804	0.416224	0.916996	1	0.713746	0.551715	0.36707	0.551715
TU Prostate Lapointe_25	GO:0006468|GO:0006915|GO:0009611|GO:0007165|GO:0008219|GO:0007263	MIMAT0000425	4	1	1	0.871271	0.428802	0.421959	0.959839	0.749984	0.688133	0.403308	0.688133
SRS Ovarian Hendrix_24	GO:0009611|GO:0006952|GO:0006954|GO:0006955|GO:0006958|GO:0006959	MIMAT0003305	3	0.7353	0.7353	0.232572	0.420235	0.237163	0.959839	0.741418	0.952832	0.394741	0.952832
AD Lung Stearman_36	GO:0050896|GO:0006935	MIMAT0005923|MIMAT0019059	3	0.928014	0.928014	0.425286	0.395241	0.349973	0.886385	0.716424	0.760119	0.369747	0.760119
AD Ovarian Welsh_14	GO:0016071|GO:0000387|GO:0006457|GO:0000278|GO:0000075|GO:0006521|GO:0008334|GO:0051716|GO:0000398|GO:0006974|GO:0000375|GO:0044237|GO:0008152|GO:0006369|GO:0034660|GO:0008380|GO:0006396|GO:0006397	MIMAT0004701	3	0.980787	0.980787	0.584335	0.577611	0.402746	0.704327	0.969259	0.707345	0.552117	0.707345
AD Ovarian Welsh_20	GO:0018149|GO:0030154|GO:0048771|GO:0006928|GO:0007160|GO:0001501|GO:0001503|GO:0031175|GO:0007411|GO:0009653|GO:0007275|GO:0000904|GO:0001568|GO:0009611|GO:0009612|GO:0016477|GO:0043588|GO:0009887|GO:0030334|GO:0001525|GO:0009888|GO:0042060|GO:0031214|GO:0007155|GO:0051128|GO:0032964|GO:0001957|GO:0007229|GO:0042246|GO:0030199|GO:0030198|GO:0048545	MIMAT0003882	3	0.754298	0.803689	0.374483	0.545924	0.916996	1	0.713746	0.533547	0.36707	0.533547
CA Bladder Dyrskjot_18	GO:0048666|GO:0030182|GO:0030814|GO:0007268|GO:0007520|GO:0031175|GO:0030252|GO:0007411|GO:0007267|GO:0007154|GO:0007186|GO:0021984	MIMAT0005881	3	0.873241	0.853335	0.381349	0.248976	0.516654	0.832692	0.711515	0.485096	0.366275	0.485096
CA Breast Sorlie_23	GO:0014829|GO:0051384|GO:0034372|GO:0007497|GO:0051246|GO:0030155|GO:0043491|GO:0048469|GO:0006928|GO:0042592|GO:0046888|GO:0008217|GO:0007165|GO:0007166|GO:0019915|GO:0042310|GO:0007169|GO:0007275|GO:0043268|GO:0007517|GO:0042127|GO:0002576|GO:0006641|GO:0000165|GO:0010828|GO:0045725|GO:0016477|GO:0008284|GO:0030334|GO:0006629|GO:0006936|GO:0008283|GO:0008015|GO:0046326|GO:0032870|GO:0007155|GO:…	MIMAT0004748	3	1	1	0.584385	0.520496	0.620193	1	0.749984	0.688133	0.605469	0.688133
CA Colon Graudens_35	GO:0060192|GO:0034375|GO:0034372|GO:0006869|GO:0007596|GO:0030300|GO:0030301|GO:0006805|GO:0034641|GO:0010903|GO:0010873|GO:0002740|GO:0014070|GO:0042157|GO:0019441|GO:0016064|GO:0050667|GO:0009750|GO:0032375|GO:0002576|GO:0034370|GO:0009611|GO:0002682|GO:0006508|GO:0051918|GO:0033700|GO:0043691|GO:0042632|GO:0045087|GO:0031000|GO:0048261|GO:0006952|GO:0006953|GO:0008228|GO:0006956|GO:0006957|GO:…	MIMAT0000771	3	0.754437	0.754437	0.467879	0.420235	0.395429	0.987424	0.7525	1	0.785769	1
END Ovarian Hendrix_41	GO:0008284|GO:0030335|GO:0000904|GO:0050678|GO:0030182|GO:0008283|GO:0009725|GO:0007584|GO:0030154|GO:0048468|GO:0007267|GO:0002062|GO:0043434|GO:0009653|GO:0009790|GO:0007275|GO:0001649	MIMAT0004701	3	1	0.885232	0.369319	0.416224	0.698206	0.874168	0.660004	0.489695	0.337067	0.489695
GCT Seminoma Korkola_93	GO:0008284|GO:0009887|GO:0001568|GO:0048771|GO:0042221|GO:0009653	MIMAT0003310|MIMAT0004614	3	1	0.857337	0.359292	0.317847	0.87861	0.652662	0.597552	0.641247	0.488619	0.641247
GL Brain Rickman_16	GO:0034134|GO:0034138|GO:0016310|GO:0007268|GO:0007612|GO:0034130|GO:0007611|GO:0048011|GO:0001505|GO:0042428|GO:0008063|GO:0006091|GO:0030073|GO:0033572|GO:0003056|GO:0060402|GO:0046034|GO:0016188|GO:0070296|GO:0000165|GO:0006540|GO:0051209|GO:0048812|GO:0006812|GO:0019550|GO:0048489|GO:0031175|GO:0006119|GO:0008286|GO:0014808|GO:0010881|GO:0030182|GO:0006874|GO:0006811|GO:0006810|GO:0006816|GO:…	MIMAT0003252	3	1	1	0.584385	0.557947	0.550227	0.780438	0.749984	0.798229	0.81073	0.798229
GL Brain Rickman_2	GO:0019835|GO:0002474|GO:0019060|GO:0050776|GO:0019885|GO:0019882|GO:0046633|GO:0009611|GO:0006952|GO:0010886|GO:0050900|GO:0006957|GO:0006954|GO:0006955|GO:0046967|GO:0006959	MIMAT0012735	3	0.752016	0.7353	0.458484	0.420235	0.395429	0.959839	0.741418	1	0.394741	1
IDC Breast Radvanyi_39	GO:0060347|GO:0042127|GO:0006869|GO:0030154|GO:0030301|GO:0015833|GO:0019915|GO:0009653|GO:0007275|GO:0001525|GO:0006641|GO:0045638|GO:0046879|GO:0048513|GO:0048514|GO:0010742|GO:0032502|GO:0009887|GO:0019216|GO:0050727|GO:0055088|GO:0045595|GO:0001655|GO:0009266|GO:0042632|GO:0046486|GO:0007548|GO:0042493|GO:0019433|GO:0033344|GO:0048646|GO:0030099	MIMAT0004602	3	0.943964	0.913373	0.415328	0.433716	0.916996	0.744053	0.497959	0.647467	0.311687	0.647467
IDC Breast Radvanyi_59	GO:0034080|GO:0045842|GO:0007094|GO:0045840|GO:0000086|GO:0000087|GO:0000084|GO:0007079|GO:0000082|GO:0000083|GO:0008608|GO:0000226|GO:0000022|GO:0051303|GO:0007067|GO:0007049|GO:0031577|GO:0008283|GO:0051329|GO:0007080|GO:0006260|GO:0051301|GO:0007088|GO:0006310|GO:0000278|GO:0006281|GO:0000216|GO:0031145|GO:0006974|GO:0007051|GO:0007052|GO:0010458|GO:0000236|GO:0007076|GO:0007059|GO:0051987|GO:…	MIMAT0007347	3	0.915823	0.961157	0.584335	0.590427	0.218526	0.704327	1	0.507284	0.552117	0.507284
SMCL Lung Bhattacharjee_28	GO:0045087|GO:0009611|GO:0006956|GO:0006957|GO:0006954|GO:0006955|GO:0006958|GO:0006959	MIMAT0004945	3	0.7353	0.7353	0.232572	0.392564	0.319099	0.959839	0.713746	0.952832	0.36707	0.952832
SMCL Lung Bhattacharjee_51	GO:0008064|GO:0016044|GO:0050896|GO:0007596|GO:0006928|GO:0006952|GO:0008154	MIMAT0015017|MIMAT0015090|MIMAT0018079|MIMAT0020601|MIMAT0020602|MIMAT0005926	3	0.928014	0.928014	0.425286	0.486363	0.349973	0.987424	0.741418	0.760119	0.394741	0.760119
SQ Lung Bhattacharjee_23	GO:0007596|GO:0030183|GO:0034392|GO:0042102|GO:0045579|GO:0050776|GO:0006955|GO:0045588|GO:0045577	MIMAT0003252	3	0.789678	0.7353	0.544183	0.339827	0.395429	0.987424	0.661009	1	0.314333	1
AD Lung Beer_31	GO:0060346|GO:0030154|GO:0030335|GO:0006928|GO:0007160|GO:0001501|GO:0007162|GO:0001503|GO:0060324|GO:0031175|GO:0007411|GO:0001525|GO:0007275|GO:0001568|GO:0009611|GO:0048812|GO:0016477|GO:0043588|GO:0009887|GO:0030182|GO:0048678|GO:0009404|GO:0007155|GO:0032964|GO:0001957|GO:0030199|GO:0030198	MIMAT0000100|MIMAT0000681|MIMAT0000086	2	0.701442	0.701442	0.439792	0.416224	0.916996	1	0.713746	0.533547	0.36707	0.533547
AD Lung Bhattacharjee_0	GO:0000723|GO:0006139|GO:0000278|GO:0000075|GO:0006281|GO:0000087|GO:0051726|GO:0044237|GO:0006974|GO:0051301|GO:0006260|GO:0006261|GO:0006367|GO:0006259|GO:0007067|GO:0008152|GO:0007049|GO:0006283	MIMAT0004701	2	0.788229	0.961157	0.584335	0.712994	0.314416	0.704327	1	0.530672	0.552117	0.530672
CCC Ovarian Hendrix_33	GO:0000723|GO:0000722|GO:0006297|GO:0006283|GO:0006281|GO:0006271|GO:0032201|GO:0006974|GO:0006259|GO:0007049	MIMAT0004604|MIMAT0003948	2	0.780725	0.849208	0.343525	0.712994	0.202684	0.704327	1	0.507284	0.552117	0.507284
GL Brain Bredel_30	GO:0016079|GO:0006810|GO:0014047|GO:0007269|GO:0007268|GO:0007267|GO:0048489|GO:0017157	MIMAT0004694	2	0.809356	0.809356	0.340966	0.0912693	0.448435	0.780438	0.407236	0.416269	0.161134	0.416269
HSCC Head-Neck Cromer_18	GO:0048011|GO:0007169	MIMAT0000271|MIMAT0003283	2	0.801766	0.801766	0.386151	0.230568	0.620193	0.463047	0.55175	0.489899	0.205074	0.489899
AC Brain Sun_22	GO:0019226|GO:0006812|GO:0006811|GO:0006810|GO:0007268|GO:0006836|GO:0007267|GO:0007186	MIMAT0000455	2	0.809356	0.809356	0.381349	0.225765	0.448435	0.780438	0.546948	0.485096	0.200271	0.485096
AC Brain Sun_44	GO:0007267|GO:0050877|GO:0007269|GO:0007268	MIMAT0004982	2	0.809356	0.809356	0.269055	0.0912693	0.448435	0.395236	0.335325	0.301324	0.0892225	0.301324
AD Lung Beer_43	GO:0008284|GO:0007588|GO:0006936|GO:0006937|GO:0008015|GO:0060047|GO:0003014|GO:0007165|GO:0007166|GO:0007268|GO:0007267|GO:0008217|GO:0007186|GO:0007187|GO:0002125	MIMAT0005929	2	1	1	0.584385	0.428802	0.495084	0.661281	0.749984	0.688133	0.403308	0.688133
AD Lung Beer_5	GO:0030534|GO:0007588|GO:0050896|GO:0035094|GO:0007610|GO:0010033|GO:0048511|GO:0048878|GO:0007165|GO:0006814|GO:0007275|GO:0014070	MIMAT0005943	2	1	1	0.584385	0.480996	0.599829	0.733267	0.749984	0.760119	0.433913	0.760119
AD Lung Beer_6	GO:0016070|GO:0006139|GO:0050658|GO:0016071|GO:0000398|GO:0006974|GO:0000375|GO:0010467|GO:0044237|GO:0016032|GO:0051028|GO:0044249|GO:0007049|GO:0006397	MIMAT0003285	2	0.780725	0.849208	0.517939	0.577611	0.302175	0.704327	0.969259	0.514573	0.552117	0.514573
AD Lung Beer_9	GO:0032825|GO:0007165|GO:0046544	MIMAT0005882	2	1	1	0.584385	0.428802	0.421959	0.661281	0.749984	0.688133	0.403308	0.688133
AD Lung Bhattacharjee_30	GO:0008015|GO:0050896|GO:0008016|GO:0007610|GO:0060047|GO:0007268|GO:0007267	MIMAT0003275|MIMAT0003285	2	0.928014	0.928014	0.425286	0.395241	0.448435	0.733267	0.716424	0.760119	0.369747	0.760119
AD Lung Bhattacharjee_42	GO:0006739|GO:0019322|GO:0006081|GO:0005999|GO:0019430|GO:0006334|GO:0006520|GO:0034641|GO:0006534|GO:0006805|GO:0009410|GO:0006098|GO:0055114|GO:0006749|GO:0015949|GO:0051409|GO:0045454|GO:0051881|GO:0006979|GO:0055086|GO:0006740	MIMAT0004957	2	0.711077	0.711077	0.467879	0.344017	0.252115	0.571869	0.806555	0.464512	0.841677	0.464512
AD Lung Bhattacharjee_59	GO:0032964|GO:0016477|GO:0001568|GO:0007275|GO:0042060|GO:0006928|GO:0007160|GO:0001501|GO:0030199|GO:0018149|GO:0030198|GO:0007155|GO:0007411|GO:0001525|GO:0009611|GO:0007229	MIMAT0000100|MIMAT0000681|MIMAT0000086	2	0.701442	0.701442	0.369319	0.416224	0.916996	1	0.713746	0.533547	0.36707	0.533547
AD Lung Bhattacharjee_81	GO:0009887|GO:0051270|GO:0001568|GO:0030154|GO:0009888|GO:0048514|GO:0042312|GO:0016477|GO:0007275	MIMAT0002859	2	0.612517	0.612517	0.369319	0.416224	0.894978	1	0.435589	0.444622	0.189487	0.444622
AD Ovarian Welsh_22	GO:0008284|GO:0009725|GO:0050896|GO:0050892|GO:0035104|GO:0001934	MIMAT0005871	2	1	0.928014	0.425286	0.395241	0.349973	0.733267	0.716424	0.760119	0.369747	0.760119
AD Ovarian Welsh_7	GO:0050896	MIMAT0003320	2	0.928014	0.928014	0.425286	0.395241	0.349973	0.733267	0.716424	0.760119	0.369747	0.760119
AO Brain Bredel_22	GO:0007267|GO:0050877|GO:0007268|GO:0007269|GO:0006836	MIMAT0005867|MIMAT0003326	2	0.809356	0.809356	0.269055	0.0912693	0.448435	0.436766	0.335325	0.301324	0.0892225	0.301324
B-CLL Leukemia Haslinger_54	GO:0007267|GO:0009887|GO:0045165	MIMAT0005952|MIMAT0004980	2	0.809356	0.809356	0.269055	0.219105	0.599464	0.553919	0.335325	0.265688	0.0892225	0.265688
B-CLL Leukemia Haslinger_62	GO:0034134|GO:0044267|GO:0002756|GO:0007243|GO:0016310|GO:0043687|GO:0006468|GO:0006464|GO:0034130|GO:0006265|GO:0032870|GO:0006357|GO:0008152|GO:0006366|GO:0045588	MIMAT0002826|MIMAT0003285	2	0.820148	0.820148	0.455369	0.271649	0.376352	0.52811	0.68634	0.798229	0.4749	0.798229
CA Bladder Dyrskjot_40	GO:0008104|GO:0000086|GO:0000084|GO:0030433|GO:0000082|GO:0051439|GO:0044237|GO:0034660|GO:0008219|GO:0051436|GO:0042981|GO:0051028|GO:0006139|GO:0006487|GO:0043161|GO:0006886|GO:0042254|GO:0044419|GO:0006369|GO:0006508|GO:0008380|GO:0000278|GO:0051603|GO:0006915|GO:0000216|GO:0031145|GO:0006605|GO:0045184|GO:0000375|GO:0006977|GO:0030163|GO:0031167|GO:0001510|GO:0044257|GO:0016070|GO:0016071|GO:…	MIMAT0003323	2	0.761137	0.806727	0.904092	0.332544	0.302175	0.637999	0.76042	0.514573	0.625761	0.514573
CA Bladder Dyrskjot_49	GO:0007267|GO:0042738	MIMAT0002814	2	0.809356	0.809356	0.269055	0	0.448435	0.341795	0.335325	0.265688	0.186646	0.265688
CA Breast Richardson_29	GO:0007267|GO:0007268	MIMAT0005890	2	0.809356	0.809356	0.269055	0	0.448435	0.341795	0.335325	0.265688	0.0892225	0.265688
CA Breast Richardson_55	GO:0009887|GO:0001701|GO:0009605|GO:0009790|GO:0009653|GO:0009725|GO:0001568|GO:0009611|GO:0001501|GO:0048514|GO:0007155|GO:0001525|GO:0001955	MIMAT0003164|MIMAT0004958|MIMAT0015004|MIMAT0000688|MIMAT0003885|MIMAT0000425|MIMAT0000691	2	0.701999	0.701999	0.270942	0.392564	0.916996	1	0.713746	0.534104	0.36707	0.534104
CA Breast Sorlie_12	GO:0009887|GO:0016477|GO:0001568|GO:0007596|GO:0042060|GO:0006928|GO:0001775|GO:0030334|GO:0001525|GO:0030168	MIMAT0003285	2	0.661281	0.661281	0.333487	0.352403	0.916996	1	0.673585	0.493386	0.326909	0.493386
CA Colon Graudens_39	GO:0009263|GO:0006260|GO:0000278|GO:0007049	MIMAT0004953	2	0.676279	0.849208	0.343525	0.383243	0.127761	0.416265	0.811119	0.340158	0.163692	0.340158
GBM Brain Liang_18	GO:0044267|GO:0008104|GO:0019538|GO:0009987|GO:0044237|GO:0045184|GO:0008152	MIMAT0001621	2	0.837583	0.837583	0.594385	0.304811	0.378622	0.667126	0.70244	0.591019	0.491	0.591019
GCT Seminoma Korkola_68	GO:0007267|GO:0050877	MIMAT0005827	2	0.809356	0.809356	0.269055	0	0.448435	0.341795	0.335325	0.301324	0.0892225	0.301324
GCT Seminoma Korkola_75	GO:0048666|GO:0048699|GO:0030154|GO:0030182|GO:0007399|GO:0030817|GO:0006811|GO:0007268|GO:0007610|GO:0007611|GO:0046058|GO:0031113|GO:0001504|GO:0007158|GO:0007409|GO:0006836|GO:0007267|GO:0050804|GO:0007186|GO:0007275	MIMAT0000081|MIMAT0004926|MIMAT0000090|MIMAT0005949|MIMAT0000092|MIMAT0000719|MIMAT0003218|MIMAT0000707	2	0.809356	0.809356	0.381349	0.416224	0.605916	0.765737	0.687866	0.485096	0.377395	0.485096
GCT Seminoma Korkola_98	GO:0007155|GO:0001568|GO:0001525|GO:0048514	MIMAT0000264|MIMAT0000281	2	0.504709	0.504709	0.261511	0.137443	0.916996	1	0.327781	0.258145	0.081679	0.258145
GL Brain Bredel_38	GO:0007267|GO:0019226|GO:0007268	MIMAT0004762	2	0.809356	0.809356	0.269055	0	0.448435	0.341795	0.335325	0.265688	0.0892225	0.265688
GL Brain Bredel_79	GO:0044255|GO:0009987|GO:0044237|GO:0008152	MIMAT0004692	2	0.837583	0.837583	0.594385	0.304811	0.378622	0.667126	0.70244	0.591019	0.491	0.591019
GL Brain Rickman_23	GO:0007267|GO:0046883|GO:0019226|GO:0006810|GO:0007268	MIMAT0004764|MIMAT0004978	2	0.809356	0.809356	0.340966	0.152212	0.448435	0.780438	0.407236	0.416269	0.161134	0.416269
GLB Brain Sun_29	GO:0006813|GO:0007267|GO:0008105|GO:0007186|GO:0055085	MIMAT0005929|MIMAT0005826	2	0.809356	0.809356	0.381349	0.225765	0.448435	0.624587	0.546948	0.485096	0.200271	0.485096
GLB Brain Sun_36	GO:0007632|GO:0006836|GO:0007612|GO:0007613|GO:0007610|GO:0007611|GO:0048167|GO:0001505|GO:0019933|GO:0008542|GO:0002021|GO:0019233|GO:0007186|GO:0007187|GO:0017157|GO:0006813|GO:0006812|GO:0006811|GO:0006810|GO:0046903|GO:0007269|GO:0007268|GO:0007267|GO:0007154|GO:0050877|GO:0019226|GO:0007399|GO:0007018|GO:0006171	MIMAT0004748	2	0.873241	0.853335	0.381349	0.305066	0.533908	0.780438	0.546948	0.485096	0.371787	0.485096
GLB Brain Sun_73	GO:0043542|GO:0030336|GO:0009887|GO:0016477|GO:0010596|GO:0001568|GO:0048870|GO:0030334|GO:0032964|GO:0001501|GO:0030199|GO:0030198|GO:0048514|GO:0007155|GO:0035313|GO:0001525|GO:0043588	MIMAT0000262	2	0.541065	0.541065	0.47291	0.219105	0.916996	1	0.546689	0.348657	0.081679	0.348657
HSCC Head-Neck Cromer_25	GO:0006139|GO:0000278|GO:0010467|GO:0006260|GO:0000236|GO:0022402|GO:0051301|GO:0006397	MIMAT0002817|MIMAT0005791	2	0.703157	0.816286	0.459959	0.383243	0.244195	0.532699	0.811119	0.456592	0.436148	0.456592
IDC Breast Radvanyi_65	GO:0009987|GO:0044237|GO:0008152	MIMAT0004185	2	0.837583	0.837583	0.594385	0.304811	0.378622	0.667126	0.70244	0.591019	0.491	0.591019
ML Melanoma Talantov_8	GO:0009615|GO:0060337|GO:0032480|GO:0019221|GO:0006955	MIMAT0000263	2	0.736816	0.736816	0.343532	0.202527	0.325013	0.540554	0.52371	0.952832	0.481858	0.952832
MM Myeloma Zhan_26	GO:0050896|GO:0007610	MIMAT0005952	2	0.928014	0.928014	0.425286	0.395241	0.349973	0.733267	0.716424	0.760119	0.369747	0.760119
MM Myeloma Zhan_3	GO:0044267|GO:0006468|GO:0005975|GO:0034138|GO:0006486|GO:0043687|GO:0006464|GO:0048011|GO:0051403|GO:0007173|GO:0007167|GO:0015031|GO:0007264	MIMAT0004801|MIMAT0003285	2	0.835987	0.835987	0.420373	0.33149	0.585971	0.617663	0.652673	0.740926	0.742025	0.740926
MM Myeloma Zhan_50	GO:0045415|GO:0050896|GO:0030154|GO:0048635|GO:0042487|GO:0042592|GO:0007165|GO:0008544|GO:0007186|GO:0007275	MIMAT0000085	2	1	1	0.584385	0.520496	0.605916	0.733267	0.749984	0.760119	0.403308	0.760119
MPM Mesothelioma Gordon_44	GO:0000084|GO:0000082|GO:0034641|GO:0051439|GO:0051437|GO:0051436|GO:0007049|GO:0044267|GO:0006521|GO:0022904|GO:0006119|GO:0000278|GO:0051603|GO:0000216|GO:0031145|GO:0006974|GO:0006977|GO:0030163|GO:0008152|GO:0016071|GO:0000077|GO:0000075|GO:0006120|GO:0006511|GO:0016032	MIMAT0004701	2	0.780725	0.954084	0.584335	0.577611	0.314416	0.704327	0.969259	0.530672	0.69764	0.530672
MUC Ovarian Hendrix_3	GO:0007548|GO:0030334|GO:0001568|GO:0042446|GO:0046882|GO:0006694|GO:0001525|GO:0008202	MIMAT0005869	2	0.541065	0.541065	0.297866	0.137443	0.916996	0.920917	0.363329	0.348657	0.151889	0.348657
ODGL Brain Sun_2	GO:0007631|GO:0006813|GO:0006812|GO:0006811|GO:0006810|GO:0007268|GO:0007267|GO:0007186|GO:0050877	MIMAT0004982	2	0.809356	0.809356	0.381349	0.225765	0.448435	0.780438	0.546948	0.485096	0.200271	0.485096
ODGL Brain Sun_32	GO:0019226|GO:0006810|GO:0001505|GO:0007269|GO:0007268|GO:0007267|GO:0006836	MIMAT0000439	2	0.809356	0.809356	0.340966	0.1328	0.448435	0.780438	0.407236	0.416269	0.161134	0.416269
RCCC Renal Boer_8	GO:0002504|GO:0019882|GO:0050776|GO:0019221|GO:0002768|GO:0050852|GO:0060333|GO:0042632|GO:0031295	MIMAT0005870	2	0.752016	0.736816	0.391978	0.232361	0.395429	0.493386	0.4868	1	0.481858	1
SMCL Lung Bhattacharjee_25	GO:0006139|GO:0007049|GO:0006260|GO:0000278|GO:0000075	MIMAT0000099	2	0.70347	0.954084	0.584335	0.383243	0.244195	0.532699	0.811119	0.456592	0.436148	0.456592
SMCL Lung Bhattacharjee_35	GO:0007094|GO:0000086|GO:0000087|GO:0000085|GO:0022900|GO:0000226|GO:0007067|GO:0051028|GO:0007049|GO:0031018|GO:0007126|GO:0051084|GO:0010467|GO:0019058|GO:0051301|GO:0006366|GO:0008380|GO:0016070|GO:0000278|GO:0006281|GO:0000212|GO:0022904|GO:0007346|GO:0031145|GO:0006974|GO:0007051|GO:0007017|GO:0000236|GO:0007059|GO:0051983|GO:0006310|GO:0016071|GO:0000070|GO:0051276|GO:0000075|GO:0000375|GO:…	MIMAT0000269	2	0.788229	0.961157	0.584335	0.577611	0.266797	0.704327	1	0.507284	0.71621	0.507284
SQ Lung Bhattacharjee_18	GO:0007166	MIMAT0002171|MIMAT0003882	2	0.926874	0.926874	0.51126	0.355676	0.495084	0.588156	0.676859	0.615007	0.330182	0.615007
SQ Lung Bhattacharjee_22	GO:0031018|GO:0019083|GO:0051103|GO:0051028|GO:0006308|GO:0045767|GO:0006265|GO:0010467|GO:0019058|GO:0006405|GO:0016070|GO:0006284|GO:0006281|GO:0006288|GO:0008152|GO:0006310|GO:0016071|GO:0050658|GO:0000398|GO:0016032|GO:0006259|GO:0006415|GO:0006414|GO:0006397	MIMAT0005916|MIMAT0003275	2	0.749984	0.749984	0.981758	0.54687	0.314416	0.673585	1	0.530672	0.521376	0.530672
SQ Lung Bhattacharjee_30	GO:0007154|GO:0008217|GO:0007165	MIMAT0005588	2	1	1	0.584385	0.428802	0.516654	0.661281	0.749984	0.688133	0.403308	0.688133
TU Prostate Lapointe_23	GO:0000087|GO:0000084|GO:0000085|GO:0000082|GO:0051439|GO:0007067|GO:0051301|GO:0000722|GO:0006260|GO:0006261|GO:0000278|GO:0006139|GO:0000216|GO:0031145|GO:0007059|GO:0006310|GO:0007049|GO:0051276|GO:0000075|GO:0051726|GO:0006271|GO:0032201|GO:0006259|GO:0007093	MIMAT0000081	2	0.788229	0.961157	0.584335	0.548839	0.244195	0.532699	1	0.456592	0.448735	0.456592
TU Prostate Lapointe_40	GO:0051603|GO:0019538|GO:0006521|GO:0009987|GO:0044237|GO:0006511|GO:0030163|GO:0008152|GO:0051436	MIMAT0001621	2	0.837583	0.837583	0.594385	0.304811	0.378622	0.667126	0.70244	0.591019	0.575111	0.591019
AD Lung Beer_11	GO:0034641|GO:0006106|GO:0055114|GO:0008152|GO:0022904|GO:0006091|GO:0009083	MIMAT0000441	1	0.711077	0.711077	0.467879	0.324624	0.314416	0.540619	0.7525	0.530672	0.81073	0.530672
AD Lung Bhattacharjee_64	GO:0007155|GO:0045995	MIMAT0000451|MIMAT0003945	1	0.504709	0.504709	0.261511	0	0.504688	1	0.327781	0.258145	0.081679	0.258145
CA Colon Graudens_38	GO:0007010	MIMAT0015072|MIMAT0006764|MIMAT0005793|MIMAT0005792|MIMAT0000510|MIMAT0000095	1	0.468629	0.468629	0.225431	0.344718	0.00966718	0.418275	0.807256	0.222065	0.0455988	0.222065
END Ovarian Hendrix_22	GO:0007548|GO:0048608|GO:0009605|GO:0008406|GO:0009611|GO:0042060|GO:0048511|GO:0008585	MIMAT0000068|MIMAT0000417|MIMAT0000069|MIMAT0002820|MIMAT0000461|MIMAT0004987	1	0.701999	0.701999	0.199271	0.392564	0.30186	1	0.713746	0.534104	0.36707	0.534104
ME Melanoma Hoek_35	GO:0007507|GO:0001568|GO:0009887|GO:0010629|GO:0000122	MIMAT0000318|MIMAT0000617|MIMAT0000682	1	0.616798	0.658061	0.654099	0.219105	0.87861	0.553919	0.490418	0.448903	0.186557	0.448903
AC Brain Sun_16	GO:0016070|GO:0006139|GO:0010467|GO:0044237|GO:0045449|GO:0016071|GO:0009303|GO:0000398|GO:0010468|GO:0000375|GO:0009058|GO:0006260|GO:0006351|GO:0008152|GO:0006350|GO:0008380|GO:0006396|GO:0006397	MIMAT0003331	1	0.777165	0.777165	0.533967	0.387837	0.380362	0.590679	0.811119	0.596618	0.491	0.596618
AC Brain Sun_51	GO:0000082|GO:0006120|GO:0022900|GO:0022904|GO:0006091|GO:0006412|GO:0055114	MIMAT0004972	1	0.474041	0.600573	0.230843	0.0434157	0.0384042	0.303583	0.471292	0.25466	0.81073	0.25466
AD Lung Beer_27	GO:0016070|GO:0006139|GO:0042254|GO:0010467|GO:0008152|GO:0022904|GO:0006091|GO:0006396	MIMAT0015072|MIMAT0006764|MIMAT0005793|MIMAT0005792|MIMAT0000510	1	0.703157	0.703157	0.459959	0.332544	0.314416	0.532699	0.76042	0.530672	0.81073	0.530672
AD Lung Beer_4	GO:0051603|GO:0000084|GO:0006511|GO:0006766|GO:0006928	MIMAT0005828	1	0.487009	0.572777	0.243811	0.00301598	0.0280469	0.986717	0.430892	0.240444	0.559092	0.240444
AD Lung Bhattacharjee_65	GO:0002576|GO:0009611|GO:0006936|GO:0006928	MIMAT0004762|MIMAT0019215	1	0.701442	0.701442	0.243811	0.392564	0.210837	0.986717	0.713746	0.533547	0.36707	0.533547
AD Ovarian Welsh_15	GO:0051186|GO:0006099|GO:0009060|GO:0045333|GO:0022904|GO:0010510|GO:0006091|GO:0006090|GO:0055114	MIMAT0005940	1	0.441407	0.441407	0.198209	0	0.0384042	0.270949	0.410328	0.25466	0.81073	0.25466
B-CLL Leukemia Haslinger_17	GO:0006091|GO:0022900|GO:0055114|GO:0022904	MIMAT0004801	1	0.441407	0.441407	0.198209	0	0.0384042	0.270949	0.410328	0.25466	0.81073	0.25466
CA Bladder Dyrskjot_51	GO:0006334	MIMAT0005930	1	0.304794	0.304794	0.0615963	0.344017	0	0.254441	0.806555	0.05823	0	0.05823
CA Breast Richardson_18	GO:0009888|GO:0001501|GO:0030199|GO:0030198|GO:0007155|GO:0043588	MIMAT0000428	1	0.504709	0.504709	0.261511	0.265256	0.461493	1	0.546689	0.293654	0.081679	0.293654
CA Breast Richardson_61	GO:0006334	MIMAT0005796	1	0.304794	0.304794	0.0615963	0.344017	0	0.254441	0.806555	0.05823	0	0.05823
CA Colon Graudens_17	GO:0006104|GO:0006099|GO:0009060|GO:0022904|GO:0006091|GO:0006119	MIMAT0003265|MIMAT0003312|MIMAT0018444	1	0.441407	0.441407	0.198209	0	0	0.270949	0.38271	0.194843	0.81073	0.194843
CA Colon Graudens_4	GO:0006091	MIMAT0000436	1	0.441407	0.441407	0.198209	0	0	0.270949	0.38271	0.194843	0.81073	0.194843
CCC Ovarian Hendrix_11	GO:0009887|GO:0007399|GO:0048812|GO:0006928|GO:0030198|GO:0007411|GO:0009653	MIMAT0003308|MIMAT0003270|MIMAT0000100|MIMAT0000681|MIMAT0000086	1	0.580617	0.580617	0.270942	0.317847	0.698206	0.986717	0.697251	0.412722	0.260094	0.412722
COID Lung Bhattacharjee_87	GO:0043627|GO:0007584|GO:0043369|GO:0030335	MIMAT0005826	1	0.538528	0.538528	0.251118	0.098447	0.235639	0.874168	0.326938	0.370633	0.218005	0.370633
END Ovarian Hendrix_32	GO:0015031|GO:0006886|GO:0007049	MIMAT0004185|MIMAT0003323	1	0.676279	0.849208	0.343525	0.0539499	0.127761	0.617663	0.409795	0.340158	0.163692	0.340158
END Ovarian Hendrix_35	GO:0006334	MIMAT0005930	1	0.304794	0.304794	0.0615963	0.344017	0	0.254441	0.806555	0.05823	0	0.05823
GCT Seminoma Korkola_106	GO:0022904|GO:0006091|GO:0006520|GO:0042773|GO:0006120	MIMAT0005788	1	0.448407	0.448407	0.205209	0.0619536	0	0.277949	0.48983	0.201842	0.81073	0.201842
GCT Seminoma Korkola_107	GO:0009887|GO:0001525|GO:0048514|GO:0045765	MIMAT0004563|MIMAT0000232	1	0.41892	0.41892	0.175722	0.219105	1	0.553919	0.23847	0.251025	0	0.251025
GCT Seminoma Korkola_45	GO:0035108|GO:0030326|GO:0030154|GO:0060348|GO:0001501|GO:0001503|GO:0007411|GO:0009653|GO:0007275|GO:0007417|GO:0014032|GO:0007389|GO:0000904|GO:0000902|GO:0000122|GO:0048843|GO:0001843|GO:0048762|GO:0009887|GO:0048706|GO:0030182|GO:0003007|GO:0014031|GO:0045892|GO:0002090|GO:0007155|GO:0050771|GO:0016481|GO:0007507|GO:0030825|GO:0051216|GO:0030509|GO:0007420|GO:0007399|GO:0009790|GO:0030900	MIMAT0000261	1	0.630761	0.778166	0.672666	0.416224	0.748682	1	0.673466	0.444622	0.260094	0.444622
GL Brain Bredel_11	GO:0006120|GO:0022900|GO:0022904|GO:0006091|GO:0055114|GO:0006119	MIMAT0003389	1	0.441407	0.441407	0.198209	0	0.0384042	0.270949	0.410328	0.25466	0.81073	0.25466
GL Brain Bredel_15	GO:0006139|GO:0006260|GO:0008152|GO:0006401	MIMAT0004814|MIMAT0000445	1	0.703157	0.703157	0.459959	0.383243	0.314416	0.532699	0.811119	0.530672	0.4749	0.530672
GL Brain Bredel_32	GO:0015986|GO:0046034|GO:0010243|GO:0034220|GO:0006164|GO:0006091|GO:0006754|GO:0055086	MIMAT0000068	1	0.519833	0.519833	0.276635	0.14922	0.0608709	0.511593	0.577096	0.301461	0.81073	0.301461
GLB Brain Sun_27	GO:0016070|GO:0006139|GO:0016071|GO:0044237|GO:0045449|GO:0000398|GO:0010467|GO:0006260|GO:0006351|GO:0006353|GO:0006259|GO:0006350|GO:0008380|GO:0006396|GO:0006397	MIMAT0004801|MIMAT0004921	1	0.777165	0.777165	0.533967	0.505982	0.368502	0.590679	0.933858	0.584758	0.491	0.584758
GLB Brain Sun_41	GO:0006334|GO:0010757|GO:0042742	MIMAT0004957	1	0.495063	0.495063	0.19409	0.344017	0	0.524211	0.806555	0.417855	0.160691	0.463123
IDC Breast Radvanyi_16	GO:0000084|GO:0006520|GO:0000216|GO:0031145|GO:0034641|GO:0006977|GO:0051439|GO:0016032|GO:0051437|GO:0051436|GO:0006521	MIMAT0000441	1	0.711077	0.806727	0.467879	0.32595	0.252115	0.540619	0.7525	0.464512	0.474193	0.464512
MM Myeloma Zhan_33	GO:0016070|GO:0016032|GO:0006352|GO:0016071|GO:0045449|GO:0006928|GO:0010467|GO:0006350|GO:0008152|GO:0006366|GO:0006368|GO:0010468	MIMAT0002879	1	0.777165	0.777165	0.533967	0.387837	0.380362	0.986717	0.734523	0.596618	0.4749	0.596618
MPM Mesothelioma Gordon_28	GO:0044267|GO:0006457|GO:0044237|GO:0022900|GO:0022904|GO:0006091|GO:0006412	MIMAT0004801	1	0.761137	0.761137	0.517939	0.274563	0.302175	0.590679	0.70244	0.514573	0.81073	0.514573
MPM Mesothelioma Gordon_36	GO:0043162|GO:0006120|GO:0022900|GO:0045333|GO:0022904|GO:0006091|GO:0042773|GO:0006119	MIMAT0002178	1	0.441407	0.441407	0.198209	0	0	0.270949	0.38271	0.194843	0.81073	0.194843
MUC Ovarian Hendrix_54	GO:0030206|GO:0007517|GO:0001957|GO:0030154|GO:0046022|GO:0006928|GO:0030198|GO:0007155|GO:0009653|GO:0007275	MIMAT0004971	1	0.612517	0.612517	0.369319	0.416224	0.698206	1	0.546689	0.444622	0.321327	0.444622
OD Brain Bredel_15	GO:0006091|GO:0022900|GO:0007268	MIMAT0003945	1	0.755948	0.755948	0.215646	0	0.395027	0.288387	0.38271	0.21228	0.81073	0.21228
OD Brain Bredel_57	GO:0006091	MIMAT0000759|MIMAT0004748|MIMAT0000438	1	0.441407	0.441407	0.198209	0	0	0.270949	0.38271	0.194843	0.81073	0.194843
SQ Lung Bhattacharjee_16	GO:0009060|GO:0051084|GO:0022900|GO:0022904|GO:0006457|GO:0006091|GO:0055114|GO:0006119	MIMAT0004185	1	0.441407	0.441407	0.198209	0	0.0384042	0.270949	0.410328	0.25466	0.81073	0.25466
SQ Lung Bhattacharjee_29	GO:0007596|GO:0042060|GO:0030036	MIMAT0004762	1	0.661281	0.661281	0.333487	0.352403	0.295423	1	0.74357	0.493386	0.326909	0.493386
SQ Lung Bhattacharjee_44	GO:0009888|GO:0006928|GO:0030199|GO:0030198|GO:0008544|GO:0043588	MIMAT0003882|MIMAT0016913	1	0.487009	0.487009	0.243811	0.265256	0.461493	0.986717	0.546689	0.293654	0.0639784	0.293654
SQ Lung Bhattacharjee_45	GO:0006334	MIMAT0003330	1	0.304794	0.304794	0.0615963	0.344017	0	0.254441	0.806555	0.05823	0	0.05823
SRS Ovarian Hendrix_72	GO:0006334	MIMAT0005930	1	0.304794	0.304794	0.0615963	0.344017	0	0.254441	0.806555	0.05823	0	0.05823
TU Prostate Lapointe_37	GO:0040012	MIMAT0004975|MIMAT0002881|MIMAT0004563|MIMAT0000232	1	0.530527	0.530527	0.287329	0	0.146376	0.835559	0.147026	0.362632	0	0.362632
TU Prostate Lapointe_7	GO:0007517|GO:0030154|GO:0048701|GO:0006936|GO:0009725|GO:0001568|GO:0006461|GO:0048468|GO:0009887|GO:0048514|GO:0043627|GO:0050678|GO:0009653|GO:0060174	MIMAT0003244	1	0.762848	0.732257	0.367091	0.335327	0.894978	0.715528	0.653174	0.489695	0.337067	0.489695
AC Brain Sun_34	GO:0016070	MIMAT0000280	0	0.651754	0.651754	0.408556	0.306646	0.192792	0.481296	0.734523	0.405189	0.384745	0.405189
AD Lung Beer_52	GO:0006703|GO:0007188|GO:0019933|GO:0001952|GO:0007187	MIMAT0000724	0	0.661941	0.661941	0.246327	0.0907431	0.230151	0.766426	0.411926	0.350074	0.0652492	0.350074
CA Breast Richardson_68	GO:0034660	MIMAT0005867|MIMAT0003326	0	0.399756	0.399756	0.156558	0.0546485	0	0.229298	0.482525	0.153192	0.132748	0.153192
CCC Ovarian Hendrix_20	GO:0001501|GO:0001503|GO:0030237	MIMAT0002817	0	0.336227	0.336227	0.0930286	0.139933	0.368775	0.32323	0.159299	0.168331	0	0.168331
CCC Ovarian Hendrix_23	GO:0044267|GO:0031018|GO:0019083|GO:0019058|GO:0016032|GO:0006415|GO:0006414|GO:0006412	MIMAT0000102|MIMAT0002840	0	0.644236	0.644236	0.401037	0.213611	0.266797	0.473778	0.641487	0.397671	0.377227	0.397671
CLL Lymphoma Alizadeh_10	GO:0044267|GO:0042110|GO:0033598	MIMAT0003258|MIMAT0000076	0	0.644236	0.644236	0.401037	0.213611	0.185274	0.473778	0.641487	0.708024	0.377227	0.708024
END Ovarian Hendrix_18	GO:0006139|GO:0031018|GO:0019083|GO:0010467|GO:0019058|GO:0006350|GO:0016032|GO:0006415|GO:0006414|GO:0006412	MIMAT0004912|MIMAT0003180	0	0.703157	0.703157	0.459959	0.332544	0.266797	0.532699	0.76042	0.456592	0.436148	0.456592
GLB Brain Sun_76	GO:0006355|GO:0048709|GO:0048663|GO:0021530	MIMAT0003225|MIMAT0000250	0	0.739843	0.739843	0.496645	0.350514	0.33118	0.416969	0.670195	0.547436	0.320418	0.547436
MPM Mesothelioma Gordon_19	GO:0008104|GO:0015031|GO:0006886|GO:0006890|GO:0048205	MIMAT0004748|MIMAT0004804	0	0.441725	0.441725	0.198527	0	0.057574	0.637999	0.419596	0.27383	0.0186953	0.27383
PPC Prostate Dhanasekaran_32	GO:0001947	MIMAT0000690	0	0.105376	0.105376	0	0	0.51344	0.349078	0	0	0	0
PPC Prostate Dhanasekaran_34	GO:0006936	MIMAT0000450	0	0.30459	0.30459	0.0613915	0	0.210837	0.165292	0.127662	0.136694	0	0.136694
SRS Ovarian Hendrix_30	GO:0006702|GO:0007548|GO:0048608|GO:0042445|GO:0009725|GO:0008585|GO:0048511|GO:0032870|GO:0008207	MIMAT0003247|MIMAT0001341	0	0.688322	0.688322	0.229709	0.177706	0.30186	0.462844	0.476732	0.489695	0.47179	0.489695
AC Brain Sun_19	GO:0006629	MIMAT0002175|MIMAT0000275	0	0.473495	0.473495	0.230297	0.0687193	0.0893436	0.303037	0.496596	0.3056	0.285156	0.3056
AD Lung Beer_44	GO:0007186	MIMAT0001635|MIMAT0002174	0	0.796963	0.796963	0.381349	0.225765	0.365173	0.458245	0.546948	0.485096	0.200271	0.485096
AD Lung Beer_46	GO:0007275	MIMAT0004911|MIMAT0003274	0	0.612517	0.612517	0.369319	0.416224	0.599829	0.554284	0.435589	0.444622	0.189487	0.444622
AD Lung Beer_53	GO:0060213|GO:0006979|GO:0010467|GO:0034405|GO:0000302|GO:0010468	MIMAT0003323|MIMAT0003246	0	0.764513	0.764513	0.521315	0.345425	0.380362	0.571869	0.66312	0.596618	0.383483	0.596618
AD Lung Bhattacharjee_35	GO:0006636	MIMAT0000427	0	0.219977	0.219977	0	0	0	0.049519	0.164408	0	0.245763	0
AD Lung Bhattacharjee_39	GO:0042445	MIMAT0002839|MIMAT0002850	0	0.472907	0.472907	0.229709	0.177706	0.0887561	0.11494	0.273171	0.305012	0.0617309	0.305012
AD Lung Bhattacharjee_50	GO:0019835	MIMAT0003312|MIMAT0018444	0	0.162169	0.162169	0.458484	0	0	0	0	0.0622156	0	0
AD Lung Bhattacharjee_53	GO:0006116	MIMAT0000449|MIMAT0002809	0	0	0	0	0	0	0	0	0	0	0
AD Lung Bhattacharjee_58	GO:0016071|GO:0008380	MIMAT0003331	0	0.484712	0.484712	0.241513	0.139604	0.0257497	0.314254	0.56748	0.238147	0.217703	0.238147
AD Lung Bhattacharjee_60	GO:0016071|GO:0050658|GO:0000398|GO:0000375|GO:0008380|GO:0006396|GO:0006397	MIMAT0002817|MIMAT0004929|MIMAT0000458	0	0.511911	0.511911	0.268713	0.166803	0.0529492	0.437367	0.59468	0.265347	0.244903	0.265347
AD Lung Bhattacharjee_69	GO:0016070|GO:0006139|GO:0010467|GO:0016071	MIMAT0002868|MIMAT0000078|MIMAT0000418	0	0.703157	0.703157	0.459959	0.332544	0.244195	0.532699	0.76042	0.456592	0.436148	0.456592
AD Lung Bhattacharjee_82	GO:0007283|GO:0007276	MIMAT0003317	0	0.348086	0.348086	0.104887	0	0.254333	0.208788	0.171158	0.18019	0	0.18019
AD Lung Stearman_13	GO:0007389|GO:0009952	MIMAT0000078|MIMAT0003150	0	0.361976	0.361976	0.118778	0.165683	0.349288	0.303743	0.185048	0.194081	0	0.194081
AD Lung Stearman_6	GO:0007548|GO:0045778|GO:0032349|GO:0008585|GO:0001503|GO:0030501	MIMAT0000735	0	0.31195	0.31195	0.0687517	0.0984052	0.491492	0.315873	0.119711	0.144054	0	0.144054
AD Lung Stearman_9	GO:0042053|GO:0001661	MIMAT0005912	0	0.224048	0.224048	0	0	0	0	0.113055	0.0316413	0.391033	0.0316413
AD Ovarian Welsh_0	GO:0010033	MIMAT0000318|MIMAT0002882	0	0.754437	0.754437	0.251709	0.221664	0.176396	0.55969	0.542846	0.586541	0.433913	0.586541
AD Ovarian Welsh_9	GO:0016071|GO:0008380	MIMAT0002849	0	0.484712	0.484712	0.241513	0.139604	0.0257497	0.314254	0.56748	0.238147	0.217703	0.238147
AD Pancreas Logsdon_12	GO:0045777|GO:0002027|GO:0003079|GO:0002125|GO:0042713	MIMAT0000063|MIMAT0000064|MIMAT0000062|MIMAT0000067|MIMAT0000414|MIMAT0000065|MIMAT0000066|MIMAT0004976|MIMAT0000415|MIMAT0000096	0	0.295613	0.295613	0.0524145	0.530473	0.293405	0.0918799	0	0.127717	0	0.127717
AO Brain Bredel_33	GO:0046330|GO:0010820	MIMAT0004909	0	0.724613	0.550136	0.0875442	0.261619	0.368025	0.567969	0.582801	0.476629	0.236125	0.476629
B-CLL Leukemia Haslinger_12	GO:0016071	MIMAT0005890	0	0.484712	0.484712	0.241513	0.139604	0.0257497	0.314254	0.56748	0.238147	0.217703	0.238147
B-CLL Leukemia Haslinger_31	GO:0006874	MIMAT0005952	0	0.478194	0.478194	0.234996	0.374645	0.094043	0.198896	0.192426	0.310299	0	0.310299
B-CLL Leukemia Haslinger_34	GO:0006952|GO:0042742|GO:0015670	MIMAT0002812	0	0.729113	0.729113	0.226385	0.420235	0.151072	0.758261	0.741418	0.561218	0.394741	0.561218
B-CLL Leukemia Haslinger_35	GO:0045449|GO:0006350	MIMAT0004762|MIMAT0005884	0	0.777165	0.777165	0.533967	0.387837	0.368502	0.479943	0.73317	0.584758	0.383392	0.584758
B-CLL Leukemia Haslinger_37	GO:0016071|GO:0000398|GO:0000375|GO:0008380|GO:0006406|GO:0006397	MIMAT0000755|MIMAT0003165	0	0.484712	0.484712	0.241513	0.139604	0.0257497	0.378305	0.56748	0.238147	0.217703	0.238147
B-CLL Leukemia Haslinger_38	GO:0016070|GO:0006139|GO:0016071|GO:0010827|GO:0006913|GO:0000398|GO:0010467|GO:0051028|GO:0008380|GO:0006396|GO:0006397	MIMAT0005912	0	0.703157	0.703157	0.459959	0.332544	0.244195	0.532699	0.76042	0.456592	0.436148	0.456592
B-CLL Leukemia Haslinger_41	GO:0030218|GO:0006778	MIMAT0004761	0	0.354311	0.354311	0.111113	0.250762	0.241097	0.270363	0.294959	0.544305	0	0.544305
B-CLL Leukemia Haslinger_43	GO:0048011|GO:0019915	MIMAT0002173	0	0.679724	0.679724	0.26411	0.108526	0.498151	0.341199	0.429709	0.367857	0.0830323	0.367857
BPH Prostate Dhanasekaran_15	GO:0051028	MIMAT0003948	0	0.229601	0.229601	0	0	0	0.425875	0.052673	0.0617057	0	0.0617057
BPH Prostate Dhanasekaran_6	GO:0042327|GO:0042326|GO:0046325|GO:0043619	MIMAT0003318	0	0.534539	0.512395	0.45618	0.293012	0.253718	0.269681	0.37875	0.319988	0.0898417	0.319988
BPH Prostate Dhanasekaran_8	GO:0002504|GO:0031295	MIMAT0004913|MIMAT0005898	0	0.426697	0.404553	0.161355	0.00868409	0.145876	0.081679	0.0752088	0.67166	0	0.67166
CA Bladder Dyrskjot_0	GO:0000398	MIMAT0003275|MIMAT0003313	0	0.38754	0.38754	0.144342	0.0424329	0	0.217083	0.470309	0.140976	0.120532	0.140976
CA Bladder Dyrskjot_13	GO:0019550|GO:0019551|GO:0006532|GO:0008380|GO:0006396|GO:0006397	MIMAT0003285|MIMAT0005882	0	0.511911	0.511911	0.268713	0.166803	0.0529492	0.341453	0.59468	0.265347	0.244903	0.265347
CA Bladder Dyrskjot_29	GO:0030198|GO:0006069	MIMAT0003285	0	0.294268	0.294268	0.0510699	0.0841505	0	0.243914	0.546689	0.0477036	0.44202	0.0477036
CA Bladder Dyrskjot_37	GO:0010467|GO:0065004	MIMAT0005916	0	0.60715	0.60715	0.363952	0.235243	0.222999	0.436692	0.66312	0.439255	0.383483	0.439255
CA Bladder Dyrskjot_39	GO:0051056|GO:0007265|GO:0007264|GO:0035023	MIMAT0004762	0	0.784792	0.784792	0.369177	0.213594	0.403349	0.446074	0.534776	0.714418	0.1881	0.714418
CA Bladder Dyrskjot_54	GO:0031032|GO:0006936	MIMAT0002807	0	0.30459	0.30459	0.0613915	0.0883548	0.210837	0.165292	0.550893	0.136694	0	0.136694
CA Bladder Dyrskjot_64	GO:0016567	MIMAT0004801	0	0.458219	0.458219	0.215021	0.0275941	0	0.287761	0.45547	0.211655	0.191211	0.211655
CA Bladder Dyrskjot_79	GO:0006805	MIMAT0004928|MIMAT0000251|MIMAT0002880	0	0.606169	0.606169	0.0765638	0.0733966	0.0281281	0.305876	0.394579	0.332727	0.389637	0.332727
CA Bladder Dyrskjot_9	GO:0008152	MIMAT0001635|MIMAT0003285	0	0.698567	0.698567	0.455369	0.258464	0.314416	0.52811	0.68634	0.530672	0.4749	0.530672
CA Breast Richardson_15	GO:0060338	MIMAT0002816|MIMAT0004484	0	0.522147	0.503159	0.0875442	0.0503085	0.165559	0.388335	0.371491	0.671054	0.248201	0.671054
CA Breast Richardson_23	GO:0032411	MIMAT0015004|MIMAT0003164	0	0.250524	0.250524	0.00732629	0	0.016359	0.240225	0	0.082629	0	0.082629
CA Breast Richardson_65	GO:0007389|GO:0009952	MIMAT0005905	0	0.361976	0.361976	0.118778	0.165683	0.349288	0.303743	0.185048	0.194081	0	0.194081
CA Breast Sorlie_16	GO:0016071|GO:0000398|GO:0000375|GO:0006368|GO:0050434|GO:0008380|GO:0006397	MIMAT0003244	0	0.484712	0.484712	0.241513	0.237401	0.117334	0.314254	0.56748	0.238147	0.217703	0.238147
CA Breast Sorlie_8	GO:0019827|GO:0031581|GO:0007044|GO:0048247|GO:0007275	MIMAT0002816|MIMAT0005906	0	0.612517	0.612517	0.383739	0.416224	0.599829	0.636488	0.460565	0.444622	0.189487	0.444622
CA Colon Graudens_10	GO:0006892	MIMAT0005572	0	0.239751	0.239751	0	0	0	0.357356	0.0628233	0	0	0
CA Colon Graudens_41	GO:0016070|GO:0042273|GO:0016032|GO:0042274|GO:0019083|GO:0010467|GO:0019058|GO:0006350|GO:0006364|GO:0008152|GO:0044267|GO:0006415|GO:0006414|GO:0006412|GO:0006396|GO:0031018	MIMAT0005894	0	0.698567	0.698567	0.455369	0.306646	0.314416	0.52811	0.734523	0.530672	0.4749	0.530672
CA Colon Graudens_5	GO:0000375|GO:0000398|GO:0016071	MIMAT0005928	0	0.484712	0.484712	0.241513	0.139604	0.0257497	0.314254	0.56748	0.238147	0.217703	0.238147
CA Renal Higgins_4	GO:0006413	MIMAT0004676	0	0.297405	0.297405	0.0542072	0	0	0.126947	0.294657	0.0508409	0.0303968	0.0508409
CCC Ovarian Hendrix_42	GO:0006367|GO:0006352	MIMAT0004801	0	0.334104	0.334104	0.090906	0	0	0.163646	0.416873	0.0875397	0.0670956	0.0875397
CLL Lymphoma Alizadeh_7	GO:0009615|GO:0009607|GO:0019221|GO:0060337	MIMAT0005915	0	0.736816	0.736816	0.321201	0.165618	0.305026	0.490483	0.4868	0.678868	0.481858	0.678868
COID Lung Bhattacharjee_12	GO:0015031	MIMAT0002816|MIMAT0004779|MIMAT0004975|MIMAT0002881	0	0.421389	0.421389	0.178191	0	0.0372376	0.617663	0.244461	0.253494	0	0.253494
COID Lung Bhattacharjee_2	GO:0016071|GO:0000245|GO:0000398|GO:0000375|GO:0008380|GO:0006397	MIMAT0003323	0	0.484712	0.484712	0.241513	0.139604	0.0257497	0.314254	0.56748	0.238147	0.217703	0.238147
COID Lung Bhattacharjee_41	GO:0042311|GO:0050880|GO:0007588	MIMAT0005891	0	0.678705	0.728096	0.167555	0.115551	0.129491	0.377131	0.0463152	0.242857	0	0.242857
COID Lung Bhattacharjee_45	GO:0007389	MIMAT0004804	0	0.361976	0.361976	0.118778	0.165683	0.349288	0.303743	0.185048	0.194081	0	0.194081
COID Lung Bhattacharjee_74	GO:0016070|GO:0016071|GO:0000398|GO:0010468|GO:0000375|GO:0010467|GO:0006350|GO:0008152|GO:0045449|GO:0008380|GO:0006396|GO:0006397	MIMAT0004777	0	0.777165	0.777165	0.533967	0.387837	0.380362	0.52811	0.734523	0.596618	0.4749	0.596618
COID Lung Bhattacharjee_75	GO:0010903	MIMAT0004911	0	0.26429	0.313681	0.164975	0.0559158	0.146456	0	0.202184	0	0	0
COID Lung Bhattacharjee_84	GO:0046882	MIMAT0004804	0	0.391486	0.371579	0.19409	0	0.146456	0.117374	0	0	0	0
DLBCL Lymphoma Alizadeh_3	GO:0016310|GO:0006468	MIMAT0004945	0	0.542624	0.542624	0.299426	0.0994851	0.0836623	0.372166	0.527361	0.29606	0.272487	0.29606
DLBCL Lymphoma Alizadeh_5	GO:0042493	MIMAT0004594|MIMAT0000228	0	0.562347	0.562347	0.059619	0.0295744	0	0.3676	0.350757	0.394452	0.241824	0.394452
DLBCL Lymphoma Alizadeh_7	GO:0016070|GO:0032495|GO:0006357|GO:0006366	MIMAT0004780|MIMAT0005797	0	0.660978	0.660978	0.417779	0.306646	0.252314	0.481296	0.734523	0.46857	0.384745	0.46857
END Ovarian Hendrix_38	GO:0000910|GO:0006139|GO:0051252|GO:0006355|GO:0010467|GO:0006350|GO:0008152|GO:0045449	MIMAT0004987	0	0.777165	0.777165	0.533967	0.387837	0.368502	0.532699	0.76042	0.584758	0.4749	0.584758
END Ovarian Hendrix_52	GO:0008652|GO:0006564|GO:0006563	MIMAT0007400	0	0.312269	0.312269	0.0690704	0	0	0.141811	0.353692	0.0657041	0.338054	0.0657041
END Ovarian Hendrix_66	GO:0006024	MIMAT0000099	0	0.09032	0.09032	0	0	0	0	0.20804	0	0.400901	0
END Ovarian Hendrix_75	GO:0006357|GO:0007610|GO:0006366	MIMAT0002805	0	0.660978	0.660978	0.417779	0.271649	0.252314	0.429324	0.622888	0.46857	0.273111	0.46857
END Ovarian Hendrix_76	GO:0016070|GO:0006139|GO:0006350	MIMAT0004916	0	0.703157	0.703157	0.459959	0.332544	0.244195	0.532699	0.76042	0.456592	0.436148	0.456592
END Ovarian Hendrix_8	GO:0016070|GO:0031018|GO:0019083|GO:0000060|GO:0010467|GO:0019058|GO:0006350|GO:0006364|GO:0016032|GO:0006415|GO:0006414|GO:0006412	MIMAT0000682|MIMAT0000432	0	0.651754	0.651754	0.408556	0.306646	0.266797	0.481296	0.734523	0.439255	0.384745	0.439255
GCT Seminoma Korkola_0	GO:0032230|GO:0007389|GO:0045165|GO:0009952|GO:0007399|GO:0001705|GO:0016055|GO:0009790|GO:0009653|GO:0007275	MIMAT0005903	0	0.733146	0.733146	0.369319	0.416224	0.698206	0.652662	0.48313	0.444622	0.189487	0.444622
GCT Seminoma Korkola_100	GO:0022900|GO:0022904	MIMAT0004762	0	0.346887	0.346887	0.103689	0	0	0.176429	0.28819	0.100323	0.71621	0.100323
GCT Seminoma Korkola_109	GO:0008380|GO:0000398	MIMAT0005934	0	0.44966	0.44966	0.206462	0.104552	0	0.279202	0.532429	0.203096	0.182651	0.203096
GCT Seminoma Korkola_112	GO:0006613|GO:0006612|GO:0000398|GO:0034660|GO:0051028|GO:0000288|GO:0006520|GO:0010467|GO:0006401|GO:0006402|GO:0008380|GO:0045184|GO:0000375|GO:0045333|GO:0008152|GO:0016070|GO:0016071|GO:0044237|GO:0006396|GO:0015031|GO:0009083|GO:0006397	MIMAT0004801|MIMAT0005916	0	0.761137	0.761137	0.517939	0.306646	0.314416	0.620209	0.734523	0.530672	0.724616	0.530672
GCT Seminoma Korkola_32	GO:0008015|GO:0016539|GO:0007186|GO:0048314	MIMAT0003276	0	0.796963	0.796963	0.381349	0.225765	0.365173	0.458245	0.546948	0.485096	0.200271	0.485096
GCT Seminoma Korkola_35	GO:0044255|GO:0006695|GO:0006629|GO:0055114|GO:0008203	MIMAT0000072	0	0.505596	0.505596	0.262398	0.0687193	0.0893436	0.335138	0.496596	0.3056	0.625602	0.3056
GCT Seminoma Korkola_36	GO:0007389|GO:0021570|GO:0007275|GO:0030902|GO:0009790	MIMAT0000226|MIMAT0001080	0	0.612517	0.612517	0.369319	0.416224	0.599829	0.554284	0.435589	0.444622	0.189487	0.444622
GCT Seminoma Korkola_38	GO:0016070|GO:0010467|GO:0000085	MIMAT0000722	0	0.651754	0.651754	0.408556	0.306646	0.222999	0.481296	0.734523	0.439255	0.384745	0.439255
GCT Seminoma Korkola_42	GO:0016070|GO:0006139|GO:0006270|GO:0042254|GO:0006364|GO:0006396	MIMAT0003307|MIMAT0000450|MIMAT0005826	0	0.703157	0.703157	0.459959	0.332544	0.244195	0.532699	0.76042	0.456592	0.436148	0.456592
GCT Seminoma Korkola_48	GO:0051970|GO:0007268	MIMAT0003150	0	0.755948	0.755948	0.378367	0	0.395027	0.288387	0.281917	0.21228	0.0358143	0.21228
GCT Seminoma Korkola_56	GO:0008595	MIMAT0005917|MIMAT0004772	0	0.00229984	0.00229984	0	0	0	0	0	0	0	0
GCT Seminoma Korkola_69	GO:0007517|GO:0006936	MIMAT0000690	0	0.30459	0.30459	0.0613915	0.100025	0.328867	0.367205	0.127662	0.136694	0	0.136694
GCT Seminoma Korkola_70	GO:0022008|GO:0007399	MIMAT0004982	0	0.520208	0.520208	0.27701	0.305066	0.533908	0.5451	0.34328	0.333464	0.0971774	0.333464
GCT Seminoma Korkola_85	GO:0006703|GO:0042445|GO:0042446|GO:0007565|GO:0008210|GO:0006694|GO:0008202	MIMAT0002821|MIMAT0000256|MIMAT0000257|MIMAT0000258	0	0.472907	0.472907	0.229709	0.177706	0.0887561	0.16977	0.363329	0.305012	0.151889	0.305012
GCT Seminoma Korkola_89	GO:0030154|GO:0048468|GO:0045449|GO:0007275|GO:0007417|GO:0007389|GO:0045664|GO:0045666|GO:0021954|GO:0021871|GO:0030182|GO:0048593|GO:0048709|GO:0051593|GO:0001654|GO:0022008|GO:0009952|GO:0007420|GO:0007399|GO:0006355|GO:0030900|GO:0043010	MIMAT0003232|MIMAT0005908	0	0.777165	0.777165	0.533967	0.416224	0.656295	0.715528	0.707518	0.584758	0.357741	0.584758
GCT Seminoma Korkola_92	GO:0009298	MIMAT0003228	0	0.0195435	0.0195435	0	0	0	0	0.076807	0	0.470717	0
GCT Seminoma Korkola_95	GO:0016070|GO:0006139|GO:0010467|GO:0006350|GO:0010468|GO:0006396	MIMAT0003285|MIMAT0005799	0	0.764513	0.764513	0.521315	0.345425	0.380362	0.532699	0.76042	0.596618	0.436148	0.596618
GL Brain Bredel_72	GO:0070373	MIMAT0004957	0	0.472686	0.647162	0.27529	0	0.116099	0.0887921	0.155786	0.379272	0	0.379272
GL Brain Bredel_75	GO:0006415|GO:0006414|GO:0019083|GO:0031018	MIMAT0004921	0	0.317334	0.317334	0.0741357	0.0703568	0.266797	0.305135	0.532895	0.0707694	0.0503254	0.0707694
GL Brain Rickman_1	GO:0016071|GO:0031123|GO:0000398|GO:0000375|GO:0006396|GO:0008152|GO:0008380|GO:0006406|GO:0006397	MIMAT0005799|MIMAT0003161	0	0.698567	0.698567	0.455369	0.258464	0.314416	0.52811	0.68634	0.530672	0.4749	0.530672
GL Brain Rickman_11	GO:0044237|GO:0000398|GO:0008152|GO:0016254|GO:0008380|GO:0006397	MIMAT0003328	0	0.761137	0.761137	0.517939	0.274563	0.314416	0.590679	0.70244	0.530672	0.491	0.530672
GL Brain Rickman_17	GO:0015844	MIMAT0004766	0	0.170861	0.170861	0	0	0	0.367135	0	0.00296582	0	0.00296582
GL Brain Rickman_34	GO:0007187|GO:0006972	MIMAT0004602	0	0.661941	0.661941	0.246327	0.0907431	0.230151	0.326909	0.411926	0.350074	0.0652492	0.350074
GL Brain Rickman_9	GO:0006370|GO:0019083|GO:0050434	MIMAT0005871	0	0.398154	0.376011	0.132813	0.237401	0.117334	0.146876	0.400103	0.183604	0.0503254	0.183604
GLB Brain Sun_18	GO:0016070|GO:0006139|GO:0006355|GO:0010467|GO:0006350|GO:0008152|GO:0045449	MIMAT0003331|MIMAT0002824	0	0.777165	0.777165	0.533967	0.387837	0.368502	0.532699	0.76042	0.584758	0.4749	0.584758
GLB Brain Sun_37	GO:0060338	MIMAT0005907	0	0.522147	0.503159	0.0875442	0.0503085	0.165559	0.388335	0.371491	0.671054	0.248201	0.671054
GLB Brain Sun_50	GO:0006412	MIMAT0003285|MIMAT0005949	0	0.474041	0.474041	0.230843	0.0434157	0.015079	0.303583	0.471292	0.227476	0.207032	0.227476
GLB Brain Sun_57	GO:0009887|GO:0001707|GO:0007369|GO:0048339|GO:0001501|GO:0001756	MIMAT0004971	0	0.415398	0.415398	0.1722	0.219105	0.599464	0.553919	0.23847	0.247503	0	0.247503
GLB Brain Sun_63	GO:0009653	MIMAT0004982	0	0.51414	0.51414	0.270942	0.317847	0.698206	0.652662	0.337212	0.346245	0.0911099	0.346245
GLB Brain Sun_71	GO:0016070|GO:0044267|GO:0048856|GO:0016032|GO:0042274|GO:0019083|GO:0042254|GO:0007275|GO:0010467|GO:0019058|GO:0006350|GO:0006364|GO:0008152|GO:0006415|GO:0006414|GO:0006413|GO:0006412|GO:0006396|GO:0031018	MIMAT0005827	0	0.698567	0.698567	0.455369	0.416224	0.606145	0.5606	0.734523	0.530672	0.4749	0.530672
GLB Brain Sun_8	GO:0016070|GO:0006355|GO:0010467|GO:0045449|GO:0006351|GO:0006350	MIMAT0004597|MIMAT0002872	0	0.777165	0.777165	0.533967	0.387837	0.368502	0.481296	0.734523	0.584758	0.384745	0.584758
HSCC Head-Neck Chung_6	GO:0006139	MIMAT0004801	0	0.703157	0.703157	0.459959	0.332544	0.244195	0.532699	0.76042	0.456592	0.436148	0.456592
HSCC Head-Neck Cromer_4	GO:0006396	MIMAT0003325	0	0.511911	0.511911	0.268713	0.166803	0.0529492	0.341453	0.59468	0.265347	0.244903	0.265347
ILC Breast Radvanyi_11	GO:0048863	MIMAT0004761	0	0.228758	0.228758	0	0	0.224385	0.25365	0.05183	0	0	0
ME Melanoma Hoek_26	GO:0043473|GO:0006767|GO:0030318|GO:0006582|GO:0048066|GO:0046326	MIMAT0003242	0	0.286456	0.286456	0.0432579	0	0.161271	0.276156	0.209539	0.118561	0.326221	0.118561
ML Melanoma Talantov_21	GO:0006631|GO:0006629|GO:0006082|GO:0046168|GO:0016051|GO:0006111|GO:0044255	MIMAT0004909	0	0.512932	0.512932	0.269734	0.0687193	0.0893436	0.342475	0.496596	0.3056	0.595615	0.3056
ML Melanoma Talantov_29	GO:0016070|GO:0006139|GO:0031018|GO:0042274|GO:0019083|GO:0010467|GO:0019058|GO:0006350|GO:0006351|GO:0016032|GO:0006415|GO:0006414|GO:0006412	MIMAT0005908	0	0.703157	0.703157	0.459959	0.332544	0.266797	0.532699	0.76042	0.456592	0.436148	0.456592
MM Myeloma Zhan_10	GO:0016071|GO:0000398|GO:0000375|GO:0010467|GO:0044237|GO:0008152|GO:0006412	MIMAT0005893	0	0.761137	0.761137	0.517939	0.274563	0.314416	0.590679	0.70244	0.530672	0.491	0.530672
MM Myeloma Zhan_16	GO:0009725|GO:0051384|GO:0048545	MIMAT0000447	0	0.65759	0.65759	0.154862	0.124818	0.0795493	0.462844	0.446	0.489695	0.337067	0.489695
MM Myeloma Zhan_17	GO:0016071	MIMAT0002817|MIMAT0015072|MIMAT0006764|MIMAT0005793|MIMAT0005792|MIMAT0000510	0	0.484712	0.484712	0.241513	0.139604	0.0257497	0.314254	0.56748	0.238147	0.217703	0.238147
MM Myeloma Zhan_21	GO:0048705|GO:0001501|GO:0001503|GO:0060349|GO:0060348	MIMAT0000261	0	0.336227	0.336227	0.0930286	0.139933	0.427522	0.381978	0.159299	0.168331	0	0.168331
MM Myeloma Zhan_43	GO:0016071|GO:0050658|GO:0000398|GO:0006396|GO:0051028|GO:0008380|GO:0006406|GO:0006397	MIMAT0000422|MIMAT0000078|MIMAT0000418	0	0.511911	0.511911	0.268713	0.166803	0.0529492	0.437367	0.59468	0.265347	0.244903	0.265347
MM Myeloma Zhan_9	GO:0006805	MIMAT0000441|MIMAT0000455	0	0.606169	0.606169	0.0765638	0.0733966	0.0281281	0.305876	0.394579	0.332727	0.389637	0.332727
MPC Prostate Dhanasekaran_35	GO:0051603|GO:0030163	MIMAT0000264	0	0.433641	0.433641	0.190443	0.00301598	0	0.263183	0.430892	0.203096	0.575111	0.203096
MPM Mesothelioma Gordon_21	GO:0006369|GO:0031124|GO:0006406	MIMAT0003285	0	0.266346	0.266346	0.023148	0	0	0.378305	0.349115	0.0197817	0	0.0197817
MPM Mesothelioma Gordon_41	GO:0060213|GO:0009612|GO:0010467|GO:0051591|GO:0009416|GO:0009649|GO:0051789	MIMAT0002829|MIMAT0000736	0	0.60715	0.60715	0.363952	0.235243	0.222999	0.436692	0.66312	0.439255	0.383483	0.439255
MPM Mesothelioma Gordon_48	GO:0016070|GO:0031016|GO:0031018|GO:0019083|GO:0044237|GO:0010467|GO:0006350|GO:0008152|GO:0006415|GO:0006414|GO:0006412	MIMAT0003225|MIMAT0003274	0	0.761137	0.761137	0.517939	0.306646	0.314416	0.590679	0.734523	0.530672	0.491	0.530672
MPM Mesothelioma Gordon_51	GO:0001501|GO:0001503|GO:0030512|GO:0060348	MIMAT0003273|MIMAT0000729	0	0.597725	0.772201	0.40033	0.139933	0.368775	0.32323	0.280825	0.504311	0	0.504311
MPM Mesothelioma Gordon_52	GO:0006040	MIMAT0003274	0	0.194483	0.194483	0	0	0	0.0240251	0.138914	0	0.619717	0
MPM Mesothelioma Gordon_53	GO:0042110	MIMAT0005827	0	0.40919	0.40919	0.165992	0	0	0.238732	0.232262	0.708024	0	0.708024
MPM Mesothelioma Gordon_56	GO:0044255|GO:0006629	MIMAT0004801|MIMAT0003263	0	0.505596	0.505596	0.262398	0.0687193	0.0893436	0.335138	0.496596	0.3056	0.285156	0.3056
MPM Mesothelioma Gordon_63	GO:0016070|GO:0010467	MIMAT0019013|MIMAT0018990|MIMAT0004798|MIMAT0018972|MIMAT0019079|MIMAT0019076|MIMAT0019024|MIMAT0018938|MIMAT0018928|MIMAT0018447|MIMAT0005928|MIMAT0018969|MIMAT0018989|MIMAT0018954|MIMAT0018946|MIMAT0004812|MIMAT0004803|MIMAT0003285|MIMAT0004806|MIMAT0005935|MIMAT0005875	0	0.651754	0.651754	0.408556	0.306646	0.222999	0.481296	0.734523	0.439255	0.384745	0.439255
MUC Ovarian Hendrix_15	GO:0006139|GO:0010467	MIMAT0004987|MIMAT0004692	0	0.703157	0.703157	0.459959	0.332544	0.244195	0.532699	0.76042	0.456592	0.436148	0.456592
MUC Ovarian Hendrix_24	GO:0007186	MIMAT0004682	0	0.796963	0.796963	0.381349	0.225765	0.365173	0.458245	0.546948	0.485096	0.200271	0.485096
MUC Ovarian Hendrix_30	GO:0045454	MIMAT0003305	0	0.403259	0.403259	0.160061	0.256134	0	0.0803853	0.0739151	0.210852	0	0.210852
MUC Ovarian Hendrix_44	GO:0032465	MIMAT0000274	0	0.213611	0.213611	0	0	0	0	0	0.0212036	0	0.0212036
OD Brain Bredel_21	GO:0006412	MIMAT0003285|MIMAT0000721	0	0.474041	0.474041	0.230843	0.0434157	0.015079	0.303583	0.471292	0.227476	0.207032	0.227476
ODGL Brain Sun_10	GO:0016070|GO:0045449|GO:0010467|GO:0006350|GO:0008152	MIMAT0000241	0	0.777165	0.777165	0.533967	0.387837	0.368502	0.52811	0.734523	0.584758	0.4749	0.584758
ODGL Brain Sun_28	GO:0009615|GO:0009607	MIMAT0004675	0	0.646885	0.646885	0.144157	0.114112	0.0688438	0.452138	0.435295	0.569676	0.0886184	0.614945
ODGL Brain Sun_38	GO:0031018|GO:0021530|GO:0019083|GO:0007275|GO:0042273|GO:0044267|GO:0042274|GO:0042254|GO:0010467|GO:0019058|GO:0006364|GO:0048663|GO:0008152|GO:0021779|GO:0016070|GO:0048856|GO:0006350|GO:0016032|GO:0006415|GO:0006414|GO:0006413|GO:0006412|GO:0006396	MIMAT0007347	0	0.698567	0.698567	0.455369	0.416224	0.606145	0.5606	0.734523	0.530672	0.4749	0.530672
ODGL Brain Sun_50	GO:0016070|GO:0006139|GO:0010467|GO:0008152|GO:0006418	MIMAT0000274|MIMAT0003285	0	0.703157	0.703157	0.459959	0.332544	0.314416	0.532699	0.76042	0.530672	0.4749	0.530672
ODGL Brain Sun_7	GO:0016071	MIMAT0005882	0	0.484712	0.484712	0.241513	0.139604	0.0257497	0.314254	0.56748	0.238147	0.217703	0.238147
PPC Prostate Dhanasekaran_37	GO:0042273|GO:0031018|GO:0019083|GO:0042254|GO:0010467|GO:0019058|GO:0006350|GO:0016032|GO:0006415|GO:0006414|GO:0006412	MIMAT0003216	0	0.650401	0.650401	0.407203	0.305293	0.266797	0.479943	0.73317	0.439255	0.383483	0.439255
PPC Prostate Dhanasekaran_41	GO:0006417	MIMAT0001412|MIMAT0000072|MIMAT0000721	0	0.499304	0.499304	0.256105	0.0557034	0.0906404	0.176429	0.344139	0.306896	0.0798788	0.306896
RCCC Renal Lenburg_2	GO:0031018|GO:0019083|GO:0042255|GO:0019058|GO:0006415|GO:0006414	MIMAT0019897|MIMAT0002870|MIMAT0003180	0	0.317334	0.317334	0.0741357	0.0703568	0.266797	0.305135	0.532895	0.137856	0.0503254	0.137856
SMCL Lung Bhattacharjee_20	GO:0051028	MIMAT0004748	0	0.229601	0.229601	0	0	0	0.425875	0.052673	0.0617057	0	0.0617057
SMCL Lung Bhattacharjee_22	GO:0016070|GO:0006139|GO:0050658|GO:0046907|GO:0016071|GO:0006613|GO:0006288|GO:0008380|GO:0044419|GO:0000375|GO:0010467|GO:0000398|GO:0046796|GO:0051028|GO:0006405|GO:0006396|GO:0006397	MIMAT0005916	0	0.703157	0.703157	0.459959	0.332544	0.244195	0.615684	0.76042	0.456592	0.436148	0.456592
SMCL Lung Bhattacharjee_34	GO:0006370	MIMAT0005871	0	0.184045	0.184045	0	0	0	0.0135874	0.266814	0	0	0
SMCL Lung Bhattacharjee_47	GO:0001942|GO:0048699	MIMAT0005931	0	0.512661	0.512661	0.269463	0.237699	0.508288	0.537553	0.335733	0.266097	0.0896309	0.266097
SMCL Lung Bhattacharjee_55	GO:0007631|GO:0050804	MIMAT0004801	0	0.71671	0.696804	0.234212	0	0.47168	0.257768	0.240925	0.285003	0	0.285003
SMCL Lung Bhattacharjee_59	GO:0045627	MIMAT0004692	0	0.21902	0.199113	0	0	0.314926	0	0	0.467003	0	0.467003
SQ Lung Bhattacharjee_46	GO:0016070|GO:0006139|GO:0016032|GO:0019083|GO:0010467|GO:0009058|GO:0019058|GO:0008152|GO:0031573|GO:0006415|GO:0006414|GO:0006412|GO:0031018	MIMAT0003320	0	0.703157	0.703157	0.459959	0.332544	0.314416	0.532699	0.76042	0.530672	0.4749	0.530672
SQ Lung Bhattacharjee_52	GO:0008544|GO:0030216	MIMAT0003329	0	0.301615	0.301615	0.0584174	0.105322	0.334164	0.545317	0.124687	0.13372	0	0.13372
SRS Ovarian Hendrix_1	GO:0006139|GO:0010467|GO:0045449	MIMAT0003311|MIMAT0001639	0	0.777165	0.777165	0.533967	0.387837	0.368502	0.532699	0.76042	0.584758	0.436148	0.584758
SRS Ovarian Hendrix_11	GO:0019058|GO:0019083|GO:0031018	MIMAT0004801|MIMAT0000703	0	0.317334	0.317334	0.0741357	0.0379554	0.266797	0.305135	0.400103	0.137856	0.0503254	0.137856
SRS Ovarian Hendrix_26	GO:0008333	MIMAT0000771	0	0.142394	0.142394	0	0	0	0.259999	0	0	0	0
TU Prostate Lapointe_1	GO:0018243|GO:0018242|GO:0009100|GO:0006486	MIMAT0004801|MIMAT0000083|MIMAT0000082|MIMAT0005886	0	0.401915	0.401915	0.158717	0	0	0.231457	0.399166	0.15535	0.672303	0.15535
TU Prostate Lapointe_38	GO:0060333	MIMAT0003303|MIMAT0005791	0	0.597512	0.597512	0.181897	0.144661	0.165722	0.482687	0.465844	0.671072	0.342553	0.671072
