# Supplementary material for: A miRNA-regulatory network explains how dysregulated miRNAs perturb oncogenic processes across diverse cancers
Source: HighWire-hosted journal article supplement (doi:10.1101/gr.133991.111), 2012-06-28
Supplement: SuppTab9.xlsx [file SuppTab9.xlsx]

## Sheet: Sheet1
Supplementary Table 9.
GO Terms Mapping to the Hallmarks of Cancer
Self Sufficiency in Growth Signals
GO:0009967	Positive regulation of signal transduction
GO:0030307	Positive regulation of cell growth
GO:0008284	Positive regulation of cell proliferation
GO:0045787	Positivie regulation of cell cycle
GO:0007165	Signal transduction
Insensitivity to Antigrowth Signals
GO:0009968	Negative regulation of signal transduction
GO:0030308	Negative regulation of cell growth
GO:0008285	Negative regulation of cell proliferation
GO:0045786	Negative regulation of cell cycle
GO:0007165	Signal transduction
Evading Apoptosis
GO:0043069	Negative regulation of apoptosis
GO:0043066	Positive regulation of anti-apoptosis
GO:0045768	Negative regualtion of programmed cell death
Limitless Replicative Potential
GO:0001302	Replicative cell aging
GO:0032206	Positive regualtion of telomere maintenance
GO:0090398	Cellular senescence
Sustained Angiogenesis
GO:0045765	Positive regulation of angiogenesis
GO:0045766	Regulation of angiogenesis
GO:0030949	Positive regulation of vascular endothelial growth factor receptor signaling pathway
GO:0001570	Vasculogenesis
Tissue Invasion and Metastasis
GO:0042060	Wound healing
GO:0007162	Negative regulation of cell adhesion
GO:0033631	Cell-cell adhesion mediated by integrin
GO:0044331	Cell-cell adhesion mediated by cadherin
GO:0001837	Epithelial to mesenchymal transition
GO:0016477	Cell migration
GO:0048870	Cell motility
GO:0007155	Cell adhesion
Genome Instability and Mutation
GO:0051276	Chromosome organization
GO:0045005	Maintenance of fidelity involved in DNA-dependent DNA replication
GO:0006281	DNA repair
Tumor Promoting Inflammation
GO:0002419	T-cell mediated cytotoxicity directed against tumor cell target
GO:0002420	Natural killer cell mediated cytotoxicity directed against tumor cell target
GO:0002857	Positive regualtion of natural killer cell mediated immune response to tumor cell
GO:0002842	Positive regualtion of T-cell mediated immune response to tumor cell
GO:0002367	Cytokine production involved in immune response
GO:0050776	Regulation of immune response
Reprogramming Energy Metabolism
GO:0006096	Glycolysis
GO:0071456	Cellular response to hypoxia
Evading Immune Detection
GO:0002837	Regulation of immune response to tumor cell
GO:0002418	Immune response to tumor cells
GO:0002367	Cytokine production involved in immune response
GO:0050776	Regulation of immune response
