# Supplementary material for: A miRNA-regulatory network explains how dysregulated miRNAs perturb oncogenic processes across diverse cancers
Source: HighWire-hosted journal article supplement (doi:10.1101/gr.133991.111), 2012-06-28
Supplement: SuppTab10.xlsx [file SuppTab10.xlsx]

## Sheet: Sheet1
Supplementary Table 10.
Co-Expression Signature	miRvestigator miRNA	miRvestiagtor Validation	PITA miRNA	PITA Validation	TargetScan miRNA	TargetScan Validation	GO and miRNA Overlap
GL Brain Rickman.31	NA	NA	hsa-let-7e_hsa-let-7f_hsa-let-7g_hsa-let-7a_hsa-let-7b_hsa-let-7d_hsa-let-7i_hsa-mir-98_hsa-let-7c	dysregulated	NA	NA	hsa-let-7c_GO:0001501;hsa-let-7c_GO:0001503;hsa-let-7c_GO:0001934;hsa-let-7c_GO:0001944;hsa-let-7c_GO:0001957;hsa-let-7c_GO:0005979;hsa-let-7c_GO:0006928;hsa-let-7c_GO:0007275;hsa-let-7c_GO:0007530;hsa-let-7c_GO:0008284;hsa-let-7c_GO:0008544;hsa-let-7c_GO:0008645;hsa-let-7c_GO:0009653;hsa-let-7c_GO:0009887;hsa-let-7c_GO:0009888;hsa-let-7c_GO:0015749;hsa-let-7c_GO:0015758;hsa-let-7c_GO:0016477;hsa…
B-CLL Leukemia Haslinger.9	NA	NA	NA	NA	hsa-mir-1245b-5p_hsa-mir-1245	NA	hsa-mir-1245_GO:0042035;hsa-mir-1245_GO:0042089;hsa-mir-1245_GO:0042107;hsa-mir-1245_GO:0042108;hsa-mir-1245_GO:0045086
SRS Ovarian Hendrix.14	NA	NA	NA	NA	hsa-mir-1290	NA	hsa-mir-1290_GO:0030193;hsa-mir-1290_GO:0050818;hsa-mir-1290_GO:0051917;hsa-mir-1290_GO:0051918
IDC Breast Radvanyi.24	NA	NA	NA	NA	hsa-mir-1291	NA	hsa-mir-1291_GO:0001775;hsa-mir-1291_GO:0002252;hsa-mir-1291_GO:0002694;hsa-mir-1291_GO:0002696;hsa-mir-1291_GO:0002831;hsa-mir-1291_GO:0006950;hsa-mir-1291_GO:0007596;hsa-mir-1291_GO:0007599;hsa-mir-1291_GO:0009615;hsa-mir-1291_GO:0019932;hsa-mir-1291_GO:0031294;hsa-mir-1291_GO:0031295;hsa-mir-1291_GO:0050688;hsa-mir-1291_GO:0050690;hsa-mir-1291_GO:0050817;hsa-mir-1291_GO:0050848;hsa-mir-1291_GO…
TU Prostate Lapointe.37	NA	NA	hsa-mir-199b-3p_hsa-mir-199a-3p	causal	hsa-mir-509-3p_hsa-mir-509-3-5p	NA	hsa-mir-199a-3p_GO:0040012
AD Ovarian Welsh.26	NA	NA	hsa-mir-210	NA	NA	NA	hsa-mir-210_GO:0002521;hsa-mir-210_GO:0006917;hsa-mir-210_GO:0006928;hsa-mir-210_GO:0012502;hsa-mir-210_GO:0016477;hsa-mir-210_GO:0032943;hsa-mir-210_GO:0032944;hsa-mir-210_GO:0040012;hsa-mir-210_GO:0040017;hsa-mir-210_GO:0043065;hsa-mir-210_GO:0043068;hsa-mir-210_GO:0045321;hsa-mir-210_GO:0045672;hsa-mir-210_GO:0048518;hsa-mir-210_GO:0048870;hsa-mir-210_GO:0050789;hsa-mir-210_GO:0050794;hsa-mir-…
AD Lung Beer.35	NA	NA	hsa-mir-222	causal	NA	NA	hsa-mir-222_GO:0007155;hsa-mir-222_GO:0022610;hsa-mir-222_GO:0030029
AD Lung Bhattacharjee.41	NA	NA	NA	NA	hsa-mir-296-5p	NA	hsa-mir-296-5p_GO:0003007;hsa-mir-296-5p_GO:0006928;hsa-mir-296-5p_GO:0009653;hsa-mir-296-5p_GO:0016043;hsa-mir-296-5p_GO:0016477;hsa-mir-296-5p_GO:0040011;hsa-mir-296-5p_GO:0048518;hsa-mir-296-5p_GO:0048870;hsa-mir-296-5p_GO:0051674
SMCL Lung Bhattacharjee.36	NA	NA	NA	NA	hsa-mir-296-5p	NA	hsa-mir-296-5p_GO:0007517;hsa-mir-296-5p_GO:0009653;hsa-mir-296-5p_GO:0009887;hsa-mir-296-5p_GO:0010269;hsa-mir-296-5p_GO:0010562;hsa-mir-296-5p_GO:0030509;hsa-mir-296-5p_GO:0031960;hsa-mir-296-5p_GO:0042127;hsa-mir-296-5p_GO:0045937;hsa-mir-296-5p_GO:0051384
SQ Lung Bhattacharjee.13	NA	NA	NA	NA	hsa-mir-296-5p	NA	hsa-mir-296-5p_GO:0010884;hsa-mir-296-5p_GO:0016043;hsa-mir-296-5p_GO:0032879
AD Lung Bhattacharjee.59	NA	NA	hsa-mir-29b_hsa-mir-29c_hsa-mir-29a	causal	NA	NA	hsa-mir-29a_GO:0000904;hsa-mir-29a_GO:0001501;hsa-mir-29a_GO:0001568;hsa-mir-29a_GO:0001944;hsa-mir-29a_GO:0007229;hsa-mir-29a_GO:0007275;hsa-mir-29a_GO:0007409;hsa-mir-29a_GO:0007411;hsa-mir-29a_GO:0009611;hsa-mir-29a_GO:0009653;hsa-mir-29a_GO:0016477;hsa-mir-29a_GO:0022008;hsa-mir-29a_GO:0030199;hsa-mir-29a_GO:0032501;hsa-mir-29a_GO:0032502;hsa-mir-29a_GO:0032990;hsa-mir-29a_GO:0042060;hsa-mir-…
END Ovarian Hendrix.6	NA	NA	hsa-mir-29b_hsa-mir-29c_hsa-mir-29a	dysregulated	hsa-mir-890	NA	hsa-mir-29a_GO:0001501;hsa-mir-29a_GO:0001568;hsa-mir-29a_GO:0001944;hsa-mir-29a_GO:0007167;hsa-mir-29a_GO:0007178;hsa-mir-29a_GO:0007179;hsa-mir-29a_GO:0007275;hsa-mir-29a_GO:0009653;hsa-mir-29a_GO:0030154;hsa-mir-29a_GO:0030198;hsa-mir-29a_GO:0030199;hsa-mir-29a_GO:0032501;hsa-mir-29a_GO:0032502;hsa-mir-29a_GO:0043062;hsa-mir-29a_GO:0048513;hsa-mir-29a_GO:0048731;hsa-mir-29a_GO:0048856;hsa-mir-…
CCC Ovarian Hendrix.11	hsa-mir-638	NA	hsa-mir-29b_hsa-mir-29c_hsa-mir-29a	dysregulated	hsa-mir-602	NA	hsa-mir-29a_GO:0007409;hsa-mir-29a_GO:0007411;hsa-mir-29a_GO:0009887;hsa-mir-29a_GO:0030198;hsa-mir-29a_GO:0031175;hsa-mir-29a_GO:0032990;hsa-mir-29a_GO:0048513;hsa-mir-29a_GO:0048667;hsa-mir-29a_GO:0048812;hsa-mir-29a_GO:0048858
AD Lung Beer.31	hsa-mir-29b_hsa-mir-29c_hsa-mir-29a	causal	hsa-mir-29b_hsa-mir-29c_hsa-mir-29a	causal	hsa-mir-29b	causal	hsa-mir-29b_GO:0009404;hsa-mir-29b_GO:0030199;hsa-mir-29b_GO:0032963;hsa-mir-29b_GO:0032964;hsa-mir-29b_GO:0044236;hsa-mir-29b_GO:0044259
CA Colon Graudens.35	NA	NA	hsa-mir-325	NA	NA	NA	hsa-mir-325_GO:0006520;hsa-mir-325_GO:0051186
SMCL Lung Bhattacharjee.61	NA	NA	NA	NA	hsa-mir-331-3p	NA	hsa-mir-331-3p_GO:0000902;hsa-mir-331-3p_GO:0000904;hsa-mir-331-3p_GO:0001775;hsa-mir-331-3p_GO:0002376;hsa-mir-331-3p_GO:0002520;hsa-mir-331-3p_GO:0002682;hsa-mir-331-3p_GO:0002684;hsa-mir-331-3p_GO:0002694;hsa-mir-331-3p_GO:0002695;hsa-mir-331-3p_GO:0002696;hsa-mir-331-3p_GO:0006464;hsa-mir-331-3p_GO:0006468;hsa-mir-331-3p_GO:0006935;hsa-mir-331-3p_GO:0007154;hsa-mir-331-3p_GO:0007155;hsa-mir-3…
COID Lung Bhattacharjee.24	NA	NA	NA	NA	hsa-mir-342-5p	NA	hsa-mir-342-5p_GO:0007584;hsa-mir-342-5p_GO:0009991;hsa-mir-342-5p_GO:0010269;hsa-mir-342-5p_GO:0030198;hsa-mir-342-5p_GO:0031667;hsa-mir-342-5p_GO:0031960;hsa-mir-342-5p_GO:0043062;hsa-mir-342-5p_GO:0050900;hsa-mir-342-5p_GO:0051384
AD Lung Stearman.19	NA	NA	NA	NA	hsa-mir-370	NA	hsa-mir-370_GO:0001570
GCT Seminoma Korkola.4	NA	NA	NA	NA	hsa-mir-376a_hsa-mir-376b_hsa-mir-376c	NA	hsa-mir-376c_GO:0007157;hsa-mir-376c_GO:0007166;hsa-mir-376c_GO:0009605;hsa-mir-376c_GO:0016477;hsa-mir-376c_GO:0030595;hsa-mir-376c_GO:0032102;hsa-mir-376c_GO:0032501;hsa-mir-376c_GO:0032879;hsa-mir-376c_GO:0040011;hsa-mir-376c_GO:0040012;hsa-mir-376c_GO:0045123;hsa-mir-376c_GO:0048870;hsa-mir-376c_GO:0050900;hsa-mir-376c_GO:0050901;hsa-mir-376c_GO:0051270;hsa-mir-376c_GO:0051674
CA Breast Sorlie.23	NA	NA	NA	NA	hsa-mir-423-5p	NA	hsa-mir-423-5p_GO:0000165;hsa-mir-423-5p_GO:0006928;hsa-mir-423-5p_GO:0007165;hsa-mir-423-5p_GO:0007166;hsa-mir-423-5p_GO:0007167;hsa-mir-423-5p_GO:0007169;hsa-mir-423-5p_GO:0007243;hsa-mir-423-5p_GO:0007266;hsa-mir-423-5p_GO:0008283;hsa-mir-423-5p_GO:0008284;hsa-mir-423-5p_GO:0016043;hsa-mir-423-5p_GO:0016192;hsa-mir-423-5p_GO:0030334;hsa-mir-423-5p_GO:0032570;hsa-mir-423-5p_GO:0032879;hsa-mir-4…
HSCC Head-Neck Chung.1	hsa-mir-29b_hsa-mir-29c_hsa-mir-29a	dysregulated	hsa-mir-767-5p	NA	hsa-mir-450b-5p	NA	hsa-mir-450b-5p_GO:0001503;hsa-mir-450b-5p_GO:0001934;hsa-mir-450b-5p_GO:0030154;hsa-mir-450b-5p_GO:0030510;hsa-mir-450b-5p_GO:0030514;hsa-mir-450b-5p_GO:0033138;hsa-mir-450b-5p_GO:0048869
CA Breast Richardson.55	NA	NA	hsa-mir-130b_hsa-mir-301a_hsa-mir-301b_hsa-mir-130a_hsa-mir-454	NA	hsa-mir-544_hsa-mir-544b	NA	hsa-mir-454_GO:0001701;hsa-mir-454_GO:0009653;hsa-mir-454_GO:0009790;hsa-mir-454_GO:0048514
MM Myeloma Zhan.33	NA	NA	NA	NA	hsa-mir-507	NA	hsa-mir-507_GO:0006350;hsa-mir-507_GO:0010556;hsa-mir-507_GO:0031326;hsa-mir-507_GO:0044237;hsa-mir-507_GO:0044238;hsa-mir-507_GO:0045449
CA Bladder Dyrskjot.82	NA	NA	hsa-mir-519d	NA	hsa-mir-656	NA	hsa-mir-519d_GO:0030514;hsa-mir-519d_GO:0046631;hsa-mir-519d_GO:0048518;hsa-mir-519d_GO:0048583;hsa-mir-519d_GO:0050789;hsa-mir-519d_GO:0065007
ME Melanoma Hoek.50	NA	NA	hsa-mir-548c-3p	NA	NA	NA	hsa-mir-548c-3p_GO:0000902;hsa-mir-548c-3p_GO:0000904;hsa-mir-548c-3p_GO:0001525;hsa-mir-548c-3p_GO:0001568;hsa-mir-548c-3p_GO:0001944;hsa-mir-548c-3p_GO:0006357;hsa-mir-548c-3p_GO:0006366;hsa-mir-548c-3p_GO:0006464;hsa-mir-548c-3p_GO:0006886;hsa-mir-548c-3p_GO:0006913;hsa-mir-548c-3p_GO:0006928;hsa-mir-548c-3p_GO:0007154;hsa-mir-548c-3p_GO:0007167;hsa-mir-548c-3p_GO:0007169;hsa-mir-548c-3p_GO:00…
AD Ovarian Welsh.1	NA	NA	NA	NA	hsa-mir-548d-3p	NA	hsa-mir-548d-3p_GO:0006950;hsa-mir-548d-3p_GO:0007611;hsa-mir-548d-3p_GO:0009605;hsa-mir-548d-3p_GO:0009719;hsa-mir-548d-3p_GO:0009725;hsa-mir-548d-3p_GO:0009889;hsa-mir-548d-3p_GO:0010468;hsa-mir-548d-3p_GO:0010604;hsa-mir-548d-3p_GO:0019219;hsa-mir-548d-3p_GO:0019222;hsa-mir-548d-3p_GO:0031323;hsa-mir-548d-3p_GO:0031326;hsa-mir-548d-3p_GO:0031440;hsa-mir-548d-3p_GO:0031442;hsa-mir-548d-3p_GO:00…
AD Ovarian Welsh.16	NA	NA	NA	NA	hsa-mir-548l	NA	hsa-mir-548l_GO:0006066;hsa-mir-548l_GO:0008202;hsa-mir-548l_GO:0055114
CA Colon Graudens.40	NA	NA	hsa-mir-507_hsa-mir-557	NA	hsa-mir-369-3p	NA	hsa-mir-557_GO:0048519;hsa-mir-557_GO:0048523
SQ Lung Bhattacharjee.23	NA	NA	NA	NA	hsa-mir-586	NA	hsa-mir-586_GO:0001910;hsa-mir-586_GO:0001912;hsa-mir-586_GO:0031343;hsa-mir-586_GO:0042492;hsa-mir-586_GO:0045577;hsa-mir-586_GO:0045586;hsa-mir-586_GO:0045588;hsa-mir-586_GO:0046629;hsa-mir-586_GO:0046643;hsa-mir-586_GO:0046645
END Ovarian Hendrix.58	hsa-mir-621	NA	NA	NA	NA	NA	hsa-mir-621_GO:0006952;hsa-mir-621_GO:0006954;hsa-mir-621_GO:0009611
GL Brain Rickman.8	NA	NA	NA	NA	hsa-mir-634	NA	hsa-mir-634_GO:0001661;hsa-mir-634_GO:0007611;hsa-mir-634_GO:0007613;hsa-mir-634_GO:0014070;hsa-mir-634_GO:0031646;hsa-mir-634_GO:0032225;hsa-mir-634_GO:0050806;hsa-mir-634_GO:0051971
AC Brain Sun.5	hsa-mir-523	NA	NA	NA	hsa-mir-637	NA	hsa-mir-637_GO:0002292;hsa-mir-637_GO:0002293;hsa-mir-637_GO:0002294;hsa-mir-637_GO:0042093
AD Lung Beer.32	NA	NA	hsa-mir-656	NA	NA	NA	hsa-mir-656_GO:0001525;hsa-mir-656_GO:0001568;hsa-mir-656_GO:0001570;hsa-mir-656_GO:0001944;hsa-mir-656_GO:0003013;hsa-mir-656_GO:0006928;hsa-mir-656_GO:0007166;hsa-mir-656_GO:0007275;hsa-mir-656_GO:0007599;hsa-mir-656_GO:0008015;hsa-mir-656_GO:0008283;hsa-mir-656_GO:0009653;hsa-mir-656_GO:0016477;hsa-mir-656_GO:0030154;hsa-mir-656_GO:0030334;hsa-mir-656_GO:0030335;hsa-mir-656_GO:0032501;hsa-mir-…
GL Brain Rickman.2	hsa-mir-718	NA	NA	NA	NA	NA	hsa-mir-718_GO:0002699;hsa-mir-718_GO:0002703;hsa-mir-718_GO:0006957;hsa-mir-718_GO:0010886;hsa-mir-718_GO:0019060;hsa-mir-718_GO:0030581;hsa-mir-718_GO:0046719;hsa-mir-718_GO:0046967;hsa-mir-718_GO:0051708
B-CLL Leukemia Haslinger.27	NA	NA	hsa-mir-760	NA	NA	NA	hsa-mir-760_GO:0006323;hsa-mir-760_GO:0006333;hsa-mir-760_GO:0006334;hsa-mir-760_GO:0031497;hsa-mir-760_GO:0034728;hsa-mir-760_GO:0065004
AD Ovarian Welsh.20	NA	NA	hsa-mir-767-5p	NA	NA	NA	hsa-mir-767-5p_GO:0000902;hsa-mir-767-5p_GO:0000904;hsa-mir-767-5p_GO:0001501;hsa-mir-767-5p_GO:0001944;hsa-mir-767-5p_GO:0007229;hsa-mir-767-5p_GO:0007409;hsa-mir-767-5p_GO:0007411;hsa-mir-767-5p_GO:0009605;hsa-mir-767-5p_GO:0009888;hsa-mir-767-5p_GO:0016043;hsa-mir-767-5p_GO:0022008;hsa-mir-767-5p_GO:0030030;hsa-mir-767-5p_GO:0030198;hsa-mir-767-5p_GO:0030199;hsa-mir-767-5p_GO:0031175;hsa-mir-7…
SQ Lung Bhattacharjee.44	hsa-mir-4285	NA	hsa-mir-767-5p	NA	NA	NA	hsa-mir-767-5p_GO:0008544;hsa-mir-767-5p_GO:0009888;hsa-mir-767-5p_GO:0030198;hsa-mir-767-5p_GO:0030199;hsa-mir-767-5p_GO:0043062;hsa-mir-767-5p_GO:0043588
COID Lung Bhattacharjee.92	NA	NA	NA	NA	hsa-mir-920	NA	hsa-mir-920_GO:0007154;hsa-mir-920_GO:0030336;hsa-mir-920_GO:0050865;hsa-mir-920_GO:0051271
END Ovarian Hendrix.22	NA	NA	hsa-mir-15b_hsa-mir-15a_hsa-mir-16_hsa-mir-497_hsa-mir-195	dysregulated	hsa-mir-944	NA	hsa-mir-944_GO:0010817
