# Supplementary material for: A miRNA-regulatory network explains how dysregulated miRNAs perturb oncogenic processes across diverse cancers
Source: HighWire-hosted journal article supplement (doi:10.1101/gr.133991.111), 2012-06-28
Supplement: SuppTab11.xlsx [file SuppTab11.xlsx]

## Sheet: Sheet1
Supplementary Table 11.
miRNA	Gene Ontology (GO)			Co-Expression Cluster
	ID	Term		Tissue	Dataset	Number	Full Cancer Name	PubMed ID
hsa-miR-9	GO:0034641	Cellular nitrogen compound metabolic process		Breast	IDC Breast Radvanyi	16	Invasive Ductal Carcinoma (Radvanyi et al., 2005)	16043716
				Lung	AD Lung Beer	11	Adenocarcinoma (Beer et al., 2002)	12118244
hsa-miR-23a/b	GO:0016071	mRNA metabolic process		Lung	AD Lung Bhattacharjee	69	Adenocarcinoma (Bhattacharjee et al., 2001)	11707567
				Myeloma	MM Myeloma Zhan	43	Multiple Myeloma (Zhan et al., 2002)	11861292
hsa-miR-29a/b/c	GO:0006928	Cellular component movement		Head & Neck	HSCC Head-Neck Chung	1	Head-Neck Squamous Cell Carcinoma (Chung et al., 2004)	15144956
	GO:0030198	Extracellular matrix organization		Lung	AD Lung Beer	31	Adenocarcinoma (Beer et al., 2002)	12118244
				Lung	AD Lung Bhattacharjee	59	Adenocarcinoma (Bhattacharjee et al., 2001)	11707567
				Ovarian	CCC Ovarian HENDrix	11	Clear Cell Carcinoma (HENDrix et al., 2006)	16452189
				Ovarian	END Ovarian HENDrix	6	ENDometrioid Adenocarcinoma (HENDrix et al., 2006)	16452189
hsa-miR-130a	GO:0009611	Response to wounding		Breast	CA Breast Richardson	55	Carcinoma (Richardson et al., 2006)	16473279
				Prostate	TU Prostate Lapointe	25	Primary Tumor (Lapointe et al., 2004)	14711987
hsa-miR-183	GO:0001501	Skeletal system development		Myeloma	MM Myeloma Zhan	21	Multiple Myeloma (Zhan et al., 2002)	11861292
	GO:0001503	Ossification		Germ Cell	GCT Seminoma Korkola	45	Germ Cell Tumor (Korkola et al., 2006)	16424014
	GO:0060348	Bone development
hsa-miR-296-5p	GO:0006928	Cellular component movement		Germ Cell	GCT Seminoma Korkola	69	Germ Cell Tumor (Korkola et al., 2006)	16424014
	GO:0007155	Cell adhesion		Lung	AD Lung Bhattacharjee	41	Adenocarcinoma (Bhattacharjee et al., 2001)	11707567
	GO:0009653	Anatomical structure morphogenesis		Lung	SMCL Lung Bhattacharjee	36	Small Cell Lung Cancer (Bhattacharjee et al., 2001)	11707567
	GO:0030036	Actin cytoskeleton organization		Lung	SQ Lung Bhattacharjee	13	Squamous Cell Lung Carcinoma (Bhattacharjee et al., 2001)	11707567
	GO:0042127	Regulation of cell proliferation
	GO:0051384	Response to glucocorticoid stimulus
hsa-miR-338-5p	GO:0000075	Cell cycle checkpoint		Germ Cell	GCT Seminoma Korkola	88	Germ Cell Tumor (Korkola et al., 2006)	16424014
	GO:0000278	Mitotic cell cycle		Lung	AD Lung Bhattacharjee	0	Adenocarcinoma (Bhattacharjee et al., 2001)	11707567
	GO:0006974	Response to DNA damage stimulus		Mesothelioma	MPM Mesothelioma Gordon	44	Malignant Mesothelioma (Gordon et al., 2005)	15920167
	GO:0008152	Metabolic process		Ovarian	AD Ovarian Welsh	14	Adenocarcinoma (Welsh et al., 2001)	11158614
hsa-miR-369-5p	GO:0008152	Metabolic process		Brain	GBM Brain Liang	18	Glioblastoma Multiforme (Liang et al., 2005)	15827123
	GO:0019538	Protein metabolic process		Prostate	TU Prostate Lapointe	40	Primary Tumor (Lapointe et al., 2004)	14711987
	GO:0009987	Cellular process
	GO:0044237	Cellular metabolic process
hsa-miR-487b	GO:0031018	ENDocrine pancreas development		Ovarian	END Ovarian HENDrix	18	ENDometrioid Adenocarcinoma (HENDrix et al., 2006)	16452189
	GO:0019083	Viral transcription		Renal	RCCC Renal Lenburg	2	Clear Cell Renal Cell Carcinoma (Lenburg et al., 2003)	14641932
	GO:0019058	Viral infectious cycle
	GO:0006415	Translational termination
	GO:0006414	Translational elongation
hsa-miR-495	GO:0006397	mRNA processing		Head & Neck	HSCC Head-Neck Cromer	25	Head-Neck Squamous Cell Carcinoma(Cromer et al., 2004)	14676830
	GO:0016071	mRNA metabolic process		Lung	AD Lung Bhattacharjee	60	Adenocarcinoma (Bhattacharjee et al., 2001)	11707567
				Myeloma	MM Myeloma Zhan	17	Multiple Myeloma (Zhan et al., 2002)	11861292
hsa-miR-548c-3p	GO:0008152	Metabolic process		Bladder	CA Bladder Dyrskjot	9	Bladder Carcinoma (Dyrskjot et al., 2004)	15173019
	GO:0010467	Gene expression		Bladder	CA Bladder Dyrskjot	13	Bladder Carcinoma (Dyrskjot et al., 2004)	15173019
	GO:0016070	RNA metabolic process		Bladder	CA Bladder Dyrskjot	29	Bladder Carcinoma (Dyrskjot et al., 2004)	15173019
				Brain	GLB Brain Sun	50	Glioblastoma (Sun et al., 2006)	16616334
				Brain	OD Brain Bredel	21	OligodENDroglioma (Bredel et al., 2005)	16204036
				Brain	ODGL Brain Sun	50	OligodENDroglioma (Sun et al., 2006)	16616334
				Breast	CA Breast Sorlie	12	Carcinoma (Sorlie et al., 2001)	11553815
				Germ Cell	GCT Seminoma Korkola	95	Germ Cell Tumor (Korkola et al., 2006)	16424014
				Leukemia	B-CLL Leukemia Haslinger	62	Chronic Lymphocytic Leukemia (Haslinger et al., 2004)	15459216
				Lung	AD Lung Beer	6	Adenocarcinoma (Beer et al., 2002)	12118244
				Lung	AD Lung Bhattacharjee	30	Adenocarcinoma (Bhattacharjee et al., 2001)	11707567
				Melanoma	ME Melanoma Hoek	50	Cutaneous melanoma (Hoek et al., 2006)	16827748
				Mesothelioma	MPM Mesothelioma Gordon	63	Malignant Mesothelioma (Gordon et al., 2005)	15920167
				Myeloma	MM Myeloma Zhan	3	Multiple Myeloma (Zhan et al., 2002)	11861292
hsa-miR-548n	GO:0010467	Gene expression		Bladder	CA Bladder Dyrskjot	37	Bladder Carcinoma (Dyrskjot et al., 2004)	15173019
				Germ Cell	GCT Seminoma Korkola	40	Germ Cell Tumor (Korkola et al., 2006)	16424014
				Germ Cell	GCT Seminoma Korkola	112	Germ Cell Tumor (Korkola et al., 2006)	16424014
				Lung	SMCL Lung Bhattacharjee	22	Small Cell Lung Cancer (Bhattacharjee et al., 2001)	11707567
				Lung	SQ Lung Bhattacharjee	22	Squamous Cell Lung Carcinoma (Bhattacharjee et al., 2001)	11707567
				Melanoma	ML Melanoma Talantov	3	Melanoma (Talantov et al., 2005)	16825504
hsa-miR-590-3p	GO:0044237	Cellular metabolic process		Leukemia	B-CLL Leukemia Haslinger	17	Chronic Lymphocytic Leukemia (Haslinger et al., 2004)	15459216
				Bladder	CA Bladder Dyrskjot	64	Bladder Carcinoma (Dyrskjot et al., 2004)	15173019
				Ovarian	CCC Ovarian HENDrix	42	Clear Cell Carcinoma (HENDrix et al., 2006)	16452189
				Germ Cell	GCT Seminoma Korkola	112	Germ Cell Tumor (Korkola et al., 2006)	16424014
				Brain	GLB Brain Sun	27	Glioblastoma (Sun et al., 2006)	16616334
				Head & Neck	HSCC Head-Neck Chung	6	Head-Neck Squamous Cell Carcinoma (Chung et al., 2004)	15144956
				Myeloma	MM Myeloma Zhan	3	Multiple Myeloma (Zhan et al., 2002)	11861292
				Mesothelioma	MPM Mesothelioma Gordon	16	Malignant Mesothelioma (Gordon et al., 2005)	15920167
				Mesothelioma	MPM Mesothelioma Gordon	28	Malignant Mesothelioma (Gordon et al., 2005)	15920167
				Prostate	TU Prostate Lapointe	1	Primary Tumor (Lapointe et al., 2004)	14711987
hsa-miR-607	GO:0000398	Nuclear mRNA splicing, via spliceosome		Bladder	CA Bladder Dyrskjot	0	Bladder Carcinoma (Dyrskjot et al., 2004)	15173019
				Lung	SQ Lung Bhattacharjee	22	Squamous Cell Lung Carcinoma (Bhattacharjee et al., 2001)	11707567
hsa-miR-656	GO:0001525	Angiogenesis		Bladder	CA Bladder Dyrskjot	82	Bladder Carcinoma (Dyrskjot et al., 2004)	15173019
	GO:0001568	Blood vessel development		Lung	AD Lung Beer	32	Adenocarcinoma (Beer et al., 2002)	12118244
	GO:0001816	Cytokine production
	GO:0006928	Cellular component movement
	GO:0006935	Chemotaxis
	GO:0006952	Defense response
	GO:0006954	Inflammatory response
	GO:0006955	Immune response
	GO:0007166	Cell surface receptor linked signaling pathway
	GO:0008283	Cell proliferation
	GO:0009611	Response to wounding
	GO:0009653	Anatomical structure morphogenesis
	GO:0009887	Organ morphogenesis
	GO:0016477	Cell migration
	GO:0030334	Regulation of cell migration
	GO:0030335	Positive regulation of cell migration
	GO:0042060	Wound healing
	GO:0042127	Regulation of cell proliferation
	GO:0048514	Blood vessel morphogenesis
	GO:0048870	Cell motility
	GO:0050900	Leukocyte migration
	GO:0051272	Positive regulation of cellular component movement
hsa-miR-760	GO:0006334	Nucleosome assembly		Brain	GLB Brain Sun	41	Glioblastoma (Sun et al., 2006)	16616334
				Leukemia	B-CLL Leukemia Haslinger	27	Chronic Lymphocytic Leukemia (Haslinger et al., 2004)	15459216
				Lung	AD Lung Bhattacharjee	42	Adenocarcinoma (Bhattacharjee et al., 2001)	11707567
				Myeloma	MM Myeloma Zhan	29	Multiple Myeloma (Zhan et al., 2002)	11861292
hsa-miR-767-5p	GO:0006928	Cellular component movement		Head & Neck	HSCC Head-Neck Chung	1	Head-Neck Squamous Cell Carcinoma (Chung et al., 2004)	15144956
	GO:0030198	Extracellular matrix organization		Lung	SQ Lung Bhattacharjee	18	Squamous Cell Lung Carcinoma (Bhattacharjee et al., 2001)	11707567
	GO:0030199	Collagen fibril organization		Lung	SQ Lung Bhattacharjee	44	Squamous Cell Lung Carcinoma (Bhattacharjee et al., 2001)	11707567
				Ovarian	AD Ovarian Welsh	20	Adenocarcinoma (Welsh et al., 2001)	11158614
hsa-miR-890	GO:0001568	Blood vessel development		Lung	COID Lung Bhattacharjee	36	Carcinoid (Bhattacharjee et al., 2001)	11707567
	GO:0001822	Kidney development		Ovarian	END Ovarian HENDrix	6	ENDometrioid Adenocarcinoma (HENDrix et al., 2006)	16452189
	GO:0007155	Cell adhesion
	GO:0007275	Multicellular organismal development
	GO:0017015	Regulation of transforming growth factor beta receptor signaling pathway
hsa-miR-939	GO:0007267	Cell-cell signaling		Brain	AC Brain Sun	44	Astrocytoma (Sun et al., 2006)	16616334
	GO:0007268	Synaptic transmission		Brain	ODGL Brain Sun	2	OligodENDroglioma (Sun et al., 2006)	16616334
	GO:0050877	Neurological system process
hsa-miR-944	GO:0003676	Nucleic acid binding		Ovarian	END Ovarian HENDrix	38	ENDometrioid Adenocarcinoma (HENDrix et al., 2006)	16452189
	GO:0006139	Nucleobase, nucleoside, nucleotide and nucleic acid metabolic process		Ovarian	MUC Ovarian HENDrix	15	Mucinous Adenocarcinoma (HENDrix et al., 2006)	16452189
	GO:0010467	Gene expression
hsa-miR-1207-5p	GO:0006370	mRNA capping		Brain	GL Brain Rickman	9	Glioma (Rickman et al., 2001)	11559565
				Lung	SMCL Lung Bhattacharjee	34	Small Cell Lung Cancer (Bhattacharjee et al., 2001)	11707567
hsa-miR-1275	GO:0007186	G-protein coupled receptor protein signaling pathway		Brain	GLB Brain Sun	29	Glioblastoma (Sun et al., 2006)	16616334
	GO:0007267	Cell-cell signaling		Lung	AD Lung Beer	43	Adenocarcinoma (Beer et al., 2002)	12118244
hsa-miR-1276	GO:0006334	Nucleosome assembly		Bladder	CA Bladder Dyrskjot	51	Bladder Carcinoma (Dyrskjot et al., 2004)	15173019
				Ovarian	END Ovarian HENDrix	35	ENDometrioid Adenocarcinoma (HENDrix et al., 2006)	16452189
				Ovarian	SRS Ovarian HENDrix	72	Serous Adenocarcinoma (HENDrix et al., 2006)	16452189
hsa-miR-1291	GO:0007154	Cell communication		Bladder	CA Bladder Dyrskjot	18	Bladder Carcinoma (Dyrskjot et al., 2004)	15173019
				Breast	IDC Breast Radvanyi	24	Invasive Ductal Carcinoma (Radvanyi et al., 2005)	16043716
