# Supplementary material for: A miRNA-regulatory network explains how dysregulated miRNAs perturb oncogenic processes across diverse cancers
Source: HighWire-hosted journal article supplement (doi:10.1101/gr.133991.111), 2012-06-28
Supplement: SuppTab12.xlsx [file SuppTab12.xlsx]

## Sheet: Sheet1
Supplementary Table 12.
Gene	Forward Primer	Reverse Primer	PCR Fragment Size	Chr	Start	Stop	miRNA Binding Site in Amplicon
COL3A1	TCCATATGTGTTCCTCTTGTTCT	TTATGGGTGTCTGTAAGGAAAAA	912	2	189584785	189585696	Y
COL4A1	CCTGACTCAGCTAATGTCACAA	GCAGCTTGTGCAGTAAGTTTCTT	1366	13	109599362	109600565	Y
COL4A2	GGCCATTTTGGTGCTTATTC	CAGAACCAAGTTTTATTTTGTAGTCG	805	13	109962559	109963363	Y
COL5A2	CAATGAGCACCACCATCAAT	TTGGAAGTCAAACAAAACTCACA	2000	2	189604886	189607040	Y
COL10A1	TCTAAATCTTGTGCTAGAAAAAGCA	CTTTGAACAATGAAAAGCCTTG	1107	6	116546778	116547928	Y
FBN1	TCACCATCCAGAGACCAAATA	CAAAGTGATTTTGGCTGAGTAAA	2593	15	46487885	46490477	Y
LOX	ATAAATCAGTGCCTGGTGTTCTG	ATGAGAATGCAAAGAGGAACA	3450	5	121426789	121430336	Y
MMP2	CCTCTCCACTGCCTTCGATA	CCTCGAACAGATGCCACAAT	1017	16	54096882	54097898	Y
PDGFRB	TTTCTGCTCCTGACGTGTTG	TGAGTGAGAAGCACCAGGTTT	1797	5	149473597	149475393	Y
SERPINH1	CTCAGGGTGCACACAGGAT	CACGCTCCAACAAAATGTCA	712	11	74960780	74961491	Y
SPARC	CTCTTTAACCCTCCCCTTCG	GAGGGGAAATGACATCTGGA	2039	15	151021258	151023296	Y
Recombinant PCR Primers
MMP2_recomb_F	GCCACACTTCAGGCTCTTCTC
MMP2_bubble_del_R	GAGAAGAGCCTGAAGTGTGGCcgacaacGGGCAGCCCAAAGCAGGGCTG
SPARC_recomb_del_F	CATAGATTTAAGTGAATACATTAACatgcggtAAAATGAAAATTCTAACCC
SPARC_recomb_del_R	TGTATTCACTTAAATCTATGTaccgcatTTGTCTCCAGGCAGAACAAC
